# Supplementary material for: Controllable stereoselective synthesis of trisubstituted alkenes by a catalytic three-component reaction of terminal alkynes, benzylic alcohols, and simple arenes
Source: Royal Society of Chemistry journal article supplement (doi:10.1039/b911954j), 2009-01-01

# Controllable stereoselective synthesis of trisubstituted alkenes by a catalytic three-component reaction of terminal alkynes, benzylic alcohols, and simple arenes

Hai-Hua Li, Yin-Huan Jin, Jie-Qi Wang, and Shi-Kai Tian\*

*Department of Chemistry, University of Science and Technology of China, Hefei,  
Anhui 230026, China*

## Supporting information

### Table of contents

|                                                                                                                           |    |
|---------------------------------------------------------------------------------------------------------------------------|----|
| General information.....                                                                                                  | 1  |
| General procedure for the optimization of reaction conditions (Table 1).....                                              | 2  |
| General procedure for the controllable stereoselective three-component synthesis of trisubstituted alkenes (Table 2)..... | 2  |
| Analytical data for the products shown in Table 2.....                                                                    | 2  |
| Reaction of ( <i>R</i> )-1-phenylethanol with phenylacetylene ( <b>1a</b> ) and mesitylene ( <b>3a</b> ).....             | 14 |
| Copies of <sup>1</sup> H and <sup>13</sup> C NMR spectra.....                                                             | 15 |

### General information

The <sup>1</sup>H and <sup>13</sup>C NMR spectra were recorded on a Bruker AC-300 FT spectrometer (300 MHz and 75 MHz, respectively) using tetramethylsilane as internal reference, and the chemical shifts ( $\delta$ ) and coupling constants ( $J$ ) were expressed in ppm and Hz, respectively. The 2D NOESY spectra were recorded on a Bruker AC-400 FT spectrometer (400 MHz). The high resolution mass spectra were recorded on a LC-TOF spectrometer (Micromass). High pressure liquid chromatography (HPLC) analyses were performed on an instrument equipped with an isostatic pump and a Chiralpak OD column (250 x 4.6 mm), and the UV detection was monitored at 254 nm. The melting points were uncorrected.

The chemicals were purchased from Acros, Alfa Aesar, AstaTech Pharmaceutical Co., Meryer, Sigma-Aldrich, TCI, and the Sinopharm Chemical Reagent Co., and used as received. All the solvents were untreated before use.

### General procedure for the optimization of reaction conditions (Table 1)

To a stirred solution of phenylacetylene (**1a**, 20.4 mg, 22  $\mu$ L, 0.20 mmol) in a solvent (0.20 mL) were added successively mesitylene (**3a**, 48.0 mg, 55  $\mu$ L, 0.40 mmol), benzhydrol (**2a**, 55.2 mg, 0.30 mmol), and catalyst (10-20 mol %). The resulting mixture was stirred at an ambient temperature of 10  $^{\circ}$ C for 21 h. The mixture was directly purified by silica gel column chromatography, eluting with petroleum ether, to give alkene product **4Aa**.

### General procedure for the controllable stereoselective three-component synthesis of trisubstituted alkenes (Table 2)

To a stirred solution of terminal alkyne **1** (0.20 mmol) in nitromethane (0.20 mL, precooled if the reaction was carried out at below ambient temperature) were added successively simple arene **3** (0.40 mmol), benzylic alcohol **2** (0.30 mmol), AgNO<sub>3</sub> (6.8 mg, 20 mol %), FeCl<sub>3</sub> (6.6 mg, 20 mol %), and Tf<sub>2</sub>O (11.3 mg, 20 mol %). For entries 26, 29, 30 and 32-36, FeCl<sub>3</sub> (16.3 mg, 50 mol %) was used as the catalyst instead of Tf<sub>2</sub>O/FeCl<sub>3</sub>/AgNO<sub>3</sub> (1:1:1, 20 mol %). The resulting mixture was stirred at the temperature specified in Table 2 until no further transformation was observed by TLC analysis. The mixture was directly purified by silica gel column chromatography, eluting with petroleum ether, to give trisubstituted alkene **4A** and its isomer **4B** (if any).

The stereochemistry of trisubstituted alkenes **4Aa**, **4Bd**, **4Ak**, **4Al**, **4An**, **4Aq**, **4Au**, **4Ax**, **4Ba**, **4Bc**, **4Bm**, **4Bn**, and **4Bx** was determined by 2D NOESY analysis (*vide infra*), and the stereochemistry of the rest of trisubstituted alkenes shown in Table 2 was determined by analogy. The *E/Z* ratios were determined by integrating the vinyl proton signals in the <sup>1</sup>H NMR spectra.

### Analytical data for the products shown in Table 2

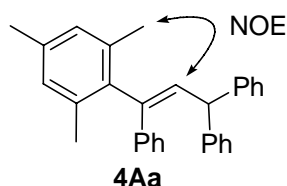

**4Aa**, obtained as a 96:4 mixture of *E/Z* isomers, white solid; m.p. 85  $^{\circ}$ C; <sup>1</sup>H NMR (300 MHz, CDCl<sub>3</sub>):  $\delta$  7.33-7.05 (m, 15H), 6.84 (s, 2H), 5.95 (d, *J* = 10.5 Hz, 1H), 5.28 (d, *J* = 10.5 Hz, 1H), 2.26 (s, 3H), 2.06 (s, 6H); Partial <sup>1</sup>H NMR for the minor *Z*-isomer: 4.44 (d, *J* = 10.5 Hz, 1H); <sup>13</sup>C NMR (75 MHz, CDCl<sub>3</sub>):  $\delta$  144.9, 139.2, 136.5, 133.4, 129.0, 128.7, 128.5, 128.2, 127.1, 126.4, 50.6, 21.1, 20.6; HRMS (EI): Calcd for C<sub>30</sub>H<sub>28</sub> (M): 388.2191. Found: 388.2188.

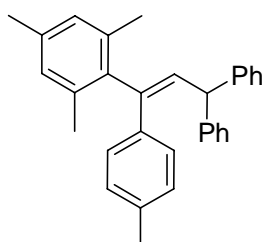

**4Ab**

**4Ab**, obtained as a 98:2 mixture of *E/Z* isomers, white solid; m.p. 97 °C;  $^1\text{H}$  NMR (300 MHz,  $\text{CDCl}_3$ ):  $\delta$  7.33-7.10 (m, 10H), 7.10-6.95 (m, 4H), 6.83 (s, 2H), 5.91 (d,  $J = 10.5$  Hz, 1H), 5.28 (d,  $J = 10.5$  Hz, 1H), 2.31 (s, 3H), 2.26 (s, 3H), 2.05 (s, 6H); Partial  $^1\text{H}$  NMR for the minor *Z*-isomer: 6.81 (d,  $J = 10.8$  Hz, 1H), 4.42 (d,  $J = 10.8$  Hz, 1H);  $^{13}\text{C}$  NMR (75 MHz,  $\text{CDCl}_3$ ):  $\delta$  145.0, 140.6, 139.1, 136.8, 136.4, 136.2, 132.8, 130.3, 129.5, 128.9, 128.6, 128.5, 128.4, 126.4, 126.0, 50.7, 21.3, 21.1, 20.6; HRMS (EI): Calcd for  $\text{C}_{31}\text{H}_{30}$  (M): 402.2348. Found: 402.2345.

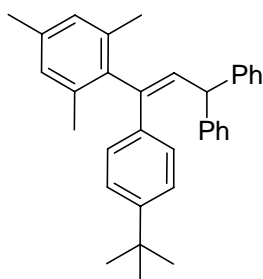

**4Ac**

**4Ac**, white solid; m.p. 136 °C;  $^1\text{H}$  NMR (300 MHz,  $\text{CDCl}_3$ ):  $\delta$  7.33-7.12 (m, 12H), 7.12-7.02 (m, 2H), 6.83 (s, 2H), 5.92 (d,  $J = 10.5$  Hz, 1H), 5.32 (d,  $J = 10.5$  Hz, 1H), 2.25 (s, 3H), 2.07 (s, 6H), 1.28 (s, 9H);  $^{13}\text{C}$  NMR (75 MHz,  $\text{CDCl}_3$ ):  $\delta$  149.9, 145.1, 140.7, 139.0, 136.4, 136.0, 132.8, 128.6, 128.5, 128.4, 126.3, 125.0, 50.6, 34.6, 31.4, 21.1, 20.6; HRMS (EI): Calcd for  $\text{C}_{34}\text{H}_{36}$  (M): 444.2817. Found: 444.2813.

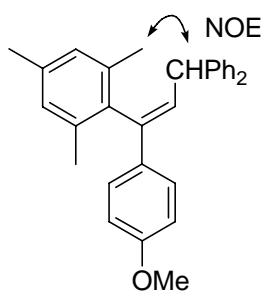

**4Bd**

**4Bd**, obtained as a 98:2 mixture of *Z/E* isomers, white solid; m.p. 110 °C;  $^1\text{H}$  NMR (300 MHz,  $\text{CDCl}_3$ ):  $\delta$  7.30-6.99 (m, 12H), 6.88 (s, 2H), 6.82-6.65 (m, 3H), 4.40 (d,  $J = 10.2$  Hz, 1H), 3.77 (s, 3H), 2.33 (s, 3H), 1.85 (s, 6H); Partial  $^1\text{H}$  NMR for the minor *E*-isomer: 5.85 (d,  $J = 10.2$  Hz, 1H), 5.25 (d,  $J = 10.2$  Hz, 1H);  $^{13}\text{C}$  NMR (75 MHz,  $\text{CDCl}_3$ ):  $\delta$  159.1, 144.7, 139.1, 136.7, 135.4, 132.8, 128.5, 128.4, 127.2, 126.2, 113.9, 55.4, 50.7, 21.2, 20.0; HRMS (EI): Calcd for  $\text{C}_{31}\text{H}_{30}\text{O}$  (M): 418.2297. Found: 418.2293.

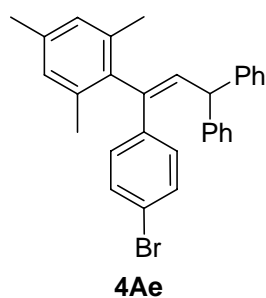

**4Ae**, obtained as a 97:3 mixture of *E/Z* isomers, white solid; m.p. 130 °C;  $^1\text{H}$  NMR (300 MHz,  $\text{CDCl}_3$ ):  $\delta$  7.40-7.12 (m, 12H), 7.03-6.95 (m, 2H), 6.83 (s, 2H), 5.97 (d,  $J = 10.5$  Hz, 1H), 5.19 (d,  $J = 10.5$  Hz, 1H), 2.26 (s, 3H), 2.03 (s, 6H); Partial  $^1\text{H}$  NMR for the minor *Z*-isomer: 4.40 (d,  $J = 10.5$  Hz, 1H);  $^{13}\text{C}$  NMR (75 MHz,  $\text{CDCl}_3$ ):  $\delta$  144.6, 138.1, 136.8, 136.4, 134.1, 131.4, 130.6, 128.8, 128.5, 128.4, 126.6, 121.2, 50.7, 21.1, 20.6; HRMS (EI): Calcd for  $\text{C}_{30}\text{H}_{27}\text{Br}$  (M): 466.1296. Found: 466.1288.

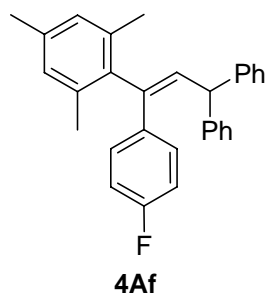

**4Af**, obtained as a 98:2 mixture of *E/Z* isomers, white solid; m.p. 90 °C;  $^1\text{H}$  NMR (300 MHz,  $\text{CDCl}_3$ ):  $\delta$  7.33-7.03 (m, 12H), 6.98-6.88 (m, 2H), 6.84 (s, 2H), 5.94 (d,  $J = 10.8$  Hz, 1H), 5.20 (d,  $J = 10.8$  Hz, 1H), 2.26 (s, 3H), 2.00 (s, 6H); Partial  $^1\text{H}$  NMR for the minor *Z*-isomer: 6.77 (d,  $J = 10.8$  Hz, 1H), 4.41 (d,  $J = 10.8$  Hz, 1H);  $^{13}\text{C}$  NMR (75 MHz,  $\text{CDCl}_3$ ):  $\delta$  161.8 (d,  $^1J_{\text{CF}} = 254$  Hz), 144.7, 140.1, 138.2, 136.7, 136.4, 135.2, 133.5, 130.7, 130.6, 128.8, 128.5, 128.4, 126.5, 115.1 (d,  $^2J_{\text{CF}} = 21$  Hz), 50.7, 21.1, 20.5; HRMS (EI): Calcd for  $\text{C}_{30}\text{H}_{27}\text{F}$  (M): 406.2097. Found: 406.2093.

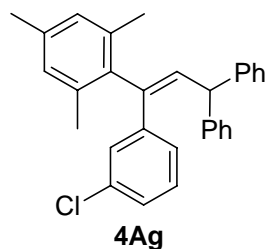

**4Ag**, obtained as a 95:5 mixture of *E/Z* isomers, white solid; m.p. 92 °C;  $^1\text{H}$  NMR (300 MHz,  $\text{CDCl}_3$ ):  $\delta$  7.35-7.01 (m, 14H), 6.84 (s, 2H), 6.01 (d,  $J = 10.5$  Hz, 1H), 5.20 (d,  $J = 10.5$  Hz, 1H), 2.27 (s, 3H), 2.05 (s, 6H); Partial  $^1\text{H}$  NMR for the minor *Z*-isomer: 4.41 (d,  $J = 10.5$  Hz, 1H); HRMS (EI): Calcd for  $\text{C}_{30}\text{H}_{27}\text{Cl}$  (M): 422.1801. Found: 422.1802.

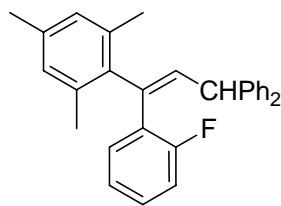

**4Ah**

**4Ah**, obtained as a 97:3 mixture of *Z/E* isomers, white solid; m.p. 102 °C;  $^1\text{H}$  NMR (300 MHz,  $\text{CDCl}_3$ ):  $\delta$  7.38-6.94 (m, 14H), 6.82 (s, 2H), 6.10 (d,  $J = 10.8$  Hz, 1H), 4.99 (d,  $J = 10.8$  Hz, 1H), 2.25 (s, 3H), 2.05 (s, 6H); Partial  $^1\text{H}$  NMR for the minor *E*-isomer: 6.52 (d,  $J = 10.5$  Hz, 1H), 4.55 (d,  $J = 10.5$  Hz, 1H);  $^{13}\text{C}$  NMR (75 MHz,  $\text{CDCl}_3$ ):  $\delta$  160.0 (d,  $^1J_{\text{CF}} = 246$  Hz), 144.1, 136.8, 133.1, 131.6, 131.0, 129.0, 128.6, 128.5, 126.4, 123.9, 116.0 (d,  $^2J_{\text{CF}} = 23$  Hz), 51.0, 21.1, 20.6; HRMS (EI): Calcd for  $\text{C}_{30}\text{H}_{27}\text{F}$  (M): 406.2097. Found: 406.2090.

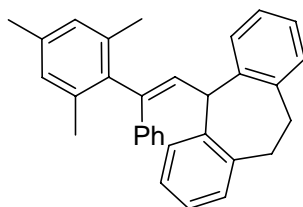

**4Ai**

**4Ai**, obtained as a 98:2 mixture of *E/Z* isomers, white solid; m.p. 112 °C;  $^1\text{H}$  NMR (300 MHz,  $\text{CDCl}_3$ ):  $\delta$  7.33-7.18 (m, 6H), 7.18-7.05 (m, 7H), 6.88 (s, 2H), 6.55 (d,  $J = 10.5$  Hz, 1H), 5.65 (d,  $J = 10.5$  Hz, 1H), 3.33-3.05 (m, 4H), 2.29 (s, 3H), 2.16 (s, 6H); Partial  $^1\text{H}$  NMR for the minor *Z*-isomer: 4.45 (d,  $J = 10.5$  Hz, 1H);  $^{13}\text{C}$  NMR (75 MHz,  $\text{CDCl}_3$ ):  $\delta$  142.5, 140.7, 140.1, 139.5, 138.8, 136.6, 136.4, 131.3, 130.3, 129.2, 128.5, 128.1, 127.2, 127.0, 126.6, 126.3, 45.9, 32.9, 21.1, 20.7; HRMS (EI): Calcd for  $\text{C}_{32}\text{H}_{30}$  (M): 414.2348. Found: 414.2350.

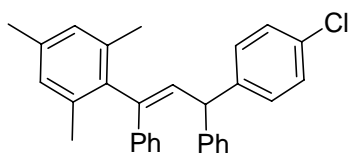

**4Aj**

**4Aj**, obtained as a 97:3 mixture of *E/Z* isomers, white solid; m.p. 122 °C;  $^1\text{H}$  NMR (300 MHz,  $\text{CDCl}_3$ ):  $\delta$  7.38-7.08 (m, 14H), 6.84 (s, 2H), 5.90 (d,  $J = 10.5$  Hz, 1H), 5.24 (d,  $J = 10.5$  Hz, 1H), 2.27 (s, 3H), 2.06 (s, 6H); Partial  $^1\text{H}$  NMR for the minor *Z*-isomer: 6.78 (d,  $J = 10.5$  Hz, 1H), 4.40 (d,  $J = 10.5$  Hz, 1H);  $^{13}\text{C}$  NMR (75 MHz,  $\text{CDCl}_3$ ):  $\delta$  144.4, 143.4, 140.2, 139.7, 139.0, 136.7, 136.3, 132.8, 132.2, 129.8, 129.0, 128.8, 128.5, 128.4, 128.3, 127.3, 126.6, 50.0, 21.1, 20.6; HRMS (EI): Calcd for  $\text{C}_{30}\text{H}_{27}\text{Cl}$  (M): 422.1801. Found: 422.1797.

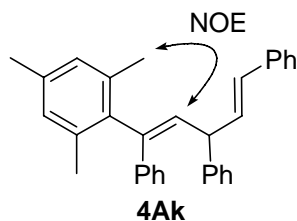

**4Ak**, obtained as a 93:7 mixture of *E/Z* isomers, yellow oil;  $^1\text{H}$  NMR (300 MHz,  $\text{CDCl}_3$ ):  $\delta$  7.41-7.11 (m, 15H), 6.86 (s, 2H), 6.60 (d,  $J = 15.9$  Hz, 1H), 6.47 (dd,  $J = 15.9, 5.4$  Hz, 1H), 5.75 (d,  $J = 10.2$  Hz, 1H), 4.87-4.74 (m, 1H), 2.27 (s, 3H), 2.20 (s, 3H), 2.05 (s, 3H); Partial  $^1\text{H}$  NMR for the minor *Z*-isomer: 5.25 (d,  $J = 10.2$  Hz, 1H); HRMS (EI): Calcd for  $\text{C}_{32}\text{H}_{30}$  (M): 414.2348. Found: 414.2343.

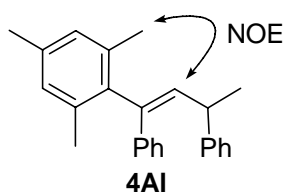

**4Al**, obtained as a 97:3 mixture of *E/Z* isomers, yellow oil;  $^1\text{H}$  NMR (300 MHz,  $\text{CDCl}_3$ ):  $\delta$  7.36-7.10 (m, 10H), 6.90 (s, 1H), 6.80 (s, 1H), 5.70 (d,  $J = 10.5$  Hz, 1H), 4.14-3.98 (m, 1H), 2.30 (s, 3H), 2.27 (s, 3H), 1.96 (s, 3H), 1.41 (d,  $J = 6.9$  Hz, 3H); Partial  $^1\text{H}$  NMR for the minor *Z*-isomer: 6.45 (d,  $J = 10.5$  Hz, 1H);  $^{13}\text{C}$  NMR (75 MHz,  $\text{CDCl}_3$ ):  $\delta$  146.8, 139.6, 137.9, 136.6, 136.4, 136.3, 129.1, 128.7, 128.5, 128.4, 128.3, 128.1, 127.0, 126.9, 126.7, 126.1, 38.8, 23.3, 21.1, 20.7, 20.5; HRMS (EI): Calcd for  $\text{C}_{25}\text{H}_{26}$  (M): 326.2035. Found: 326.2031.

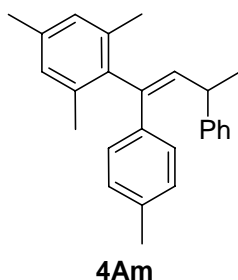

**4Am**, obtained as a 93:7 mixture of *E/Z* isomers, yellow oil;  $^1\text{H}$  NMR (300 MHz,  $\text{CDCl}_3$ ):  $\delta$  7.35-7.14 (m, 5H), 7.08-6.99 (m, 4H), 6.90 (s, 1H), 6.79 (s, 1H), 5.66 (d,  $J = 10.5$  Hz, 1H), 4.13-3.98 (m, 1H), 2.31 (s, 3H), 2.30 (s, 3H), 2.27 (s, 3H), 1.95 (s, 3H), 1.40 (d,  $J = 6.6$  Hz, 3H); Partial  $^1\text{H}$  NMR for the minor *Z*-isomer: 6.41 (d,  $J = 10.5$  Hz, 1H); HRMS (EI): Calcd for  $\text{C}_{26}\text{H}_{28}$  (M): 340.2191. Found: 340.2192.

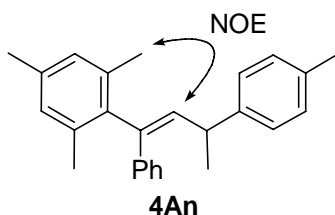

**4An**, obtained as a 96:4 mixture of *E/Z* isomers, yellow oil;  $^1\text{H}$  NMR (300 MHz,  $\text{CDCl}_3$ ):  $\delta$  7.32-7.09 (m, 9H), 6.91 (s, 1H), 6.80 (s, 1H), 5.69 (d,  $J = 10.5$  Hz, 1H), 4.10-3.94 (m, 1H), 2.33 (s, 3H), 2.31 (s, 3H), 2.27 (s, 3H), 1.96 (s, 3H), 1.39 (d,  $J = 6.9$  Hz, 3H); Partial  $^1\text{H}$  NMR for the minor *Z*-isomer: 6.43 (d,  $J = 10.5$  Hz, 1H);  $^{13}\text{C}$  NMR (75 MHz,  $\text{CDCl}_3$ ):  $\delta$  143.8, 140.7, 139.7, 137.6, 136.5, 136.4, 135.5, 129.4, 129.1, 128.9, 128.5, 128.4, 128.1, 126.9, 126.8, 38.4, 23.5, 21.2, 20.7, 20.6; HRMS (EI): Calcd for  $\text{C}_{26}\text{H}_{28}$  (M): 340.2191. Found: 340.2185.

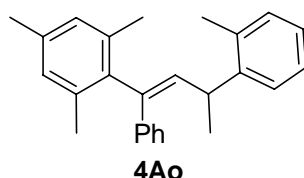

**4Ao**, obtained as a 95:5 mixture of *E/Z* isomers, white solid; m.p. 118 °C;  $^1\text{H}$  NMR (300 MHz,  $\text{CDCl}_3$ ):  $\delta$  7.34-7.05 (m, 9H), 6.90 (s, 1H), 6.81 (s, 1H), 5.74 (d,  $J = 10.2$  Hz, 1H), 4.25-4.10 (m, 1H), 2.28 (s, 6H), 2.16 (s, 3H), 1.90 (s, 3H), 1.38 (d,  $J = 6.9$  Hz, 3H); Partial  $^1\text{H}$  NMR for the minor *Z*-isomer: 6.64 (d,  $J = 10.2$  Hz, 1H); HRMS (EI): Calcd for  $\text{C}_{26}\text{H}_{28}$  (M): 340.2191. Found: 340.2192.

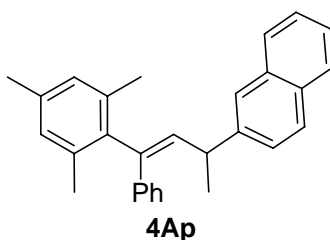

**4Ap**, obtained as a 93:7 mixture of *E/Z* isomers, yellow oil;  $^1\text{H}$  NMR (300 MHz,  $\text{CDCl}_3$ ):  $\delta$  7.88-7.67 (m, 4H), 7.50-7.34 (m, 3H), 7.30-7.10 (m, 5H), 6.92 (s, 1H), 6.81 (s, 1H), 5.81 (d,  $J = 10.5$  Hz, 1H), 4.30-4.10 (m, 1H), 2.33 (s, 3H), 2.28 (s, 3H), 1.96 (s, 3H), 1.50 (d,  $J = 6.9$  Hz, 3H); Partial  $^1\text{H}$  NMR for the minor *Z*-isomer: 6.54 (d,  $J = 10.5$  Hz, 1H); HRMS (EI): Calcd for  $\text{C}_{29}\text{H}_{28}$  (M): 376.2191. Found: 376.2187.

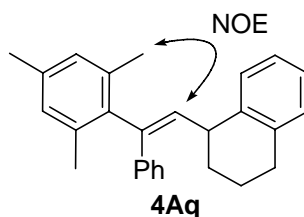

**4Aq**, obtained as a 98:2 mixture of *E/Z* isomers, white solid; m.p. 114 °C;  $^1\text{H}$  NMR (300 MHz,  $\text{CDCl}_3$ ):  $\delta$  7.36-7.04 (m, 9H), 6.87 (s, 1H), 6.85 (s, 1H), 5.56-5.50 (m, 1H), 4.20-4.05 (m, 1H), 2.87-2.72 (m, 2H), 2.27 (s, 3H), 2.24 (s, 3H), 2.23 (s, 3H), 2.10-2.00 (m, 1H), 2.00-1.85 (m, 1H), 1.84-1.60 (m, 2H); Partial  $^1\text{H}$  NMR for the minor *Z*-isomer: 6.40 (d,  $J = 10.5$  Hz, 1H);  $^{13}\text{C}$  NMR (75 MHz,  $\text{CDCl}_3$ ):  $\delta$  140.8, 139.6, 139.4, 138.8, 137.1, 136.3, 135.9, 129.3, 129.1, 128.8, 128.5, 128.2, 126.9, 126.1, 126.0, 125.8, 38.9, 30.8, 30.0, 29.7, 21.8, 21.1, 20.7; HRMS (EI): Calcd for

C<sub>27</sub>H<sub>28</sub> (M): 352.2191. Found: 352.2186.

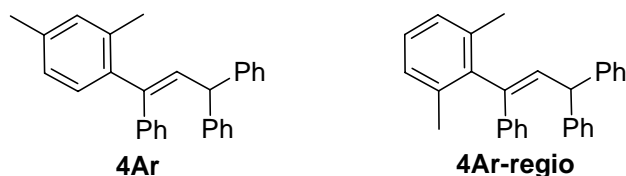

**4Ar**, obtained as a 85:15 mixture of regioisomers (**4Ar-regio** is the minor one) and as a 97:3 mixture of *E/Z* isomers, yellow oil; <sup>1</sup>H NMR (300 MHz, CDCl<sub>3</sub>): δ 7.34-7.03 (m, 16H), 7.03-6.88 (m, 2H), 6.14 (d, *J* = 10.8 Hz, 1H), 5.09 (d, *J* = 10.8 Hz, 1H), 2.30 (s, 3H), 1.96 (s, 3H); Partial <sup>1</sup>H NMR for the minor regioisomer: 5.94 (d, *J* = 10.8 Hz, 1H), 5.29 (d, *J* = 10.8 Hz, 1H), 2.10 (s, 6H); Partial <sup>1</sup>H NMR for the minor *Z*-isomer: 6.62 (d, *J* = 10.8 Hz, 1H), 4.60 (d, *J* = 10.8 Hz, 1H); HRMS (EI): Calcd for C<sub>29</sub>H<sub>26</sub> (M): 374.2035. Found: 374.2037.

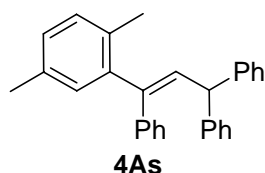

**4As**, obtained as a 96:4 mixture of *E/Z* isomers, white solid; m.p. 90 °C; <sup>1</sup>H NMR (300 MHz, CDCl<sub>3</sub>): δ 7.36-7.11 (m, 15H), 7.04-6.96 (m, 3H), 6.14 (d, *J* = 10.5 Hz, 1H), 5.10 (d, *J* = 10.5 Hz, 1H), 2.28 (s, 3H), 1.96 (s, 3H); Partial <sup>1</sup>H NMR for the minor *Z*-isomer: 6.67 (d, *J* = 10.5 Hz, 1H), 4.56 (d, *J* = 10.5 Hz, 1H); <sup>13</sup>C NMR (75 MHz, CDCl<sub>3</sub>): δ 144.9, 143.4, 141.9, 140.0, 135.1, 133.1, 130.8, 130.3, 129.3, 128.7, 128.5, 128.2, 128.1, 127.1, 126.4, 50.3, 21.0, 20.1; HRMS (EI): Calcd for C<sub>29</sub>H<sub>26</sub> (M): 374.2035. Found: 374.2028.

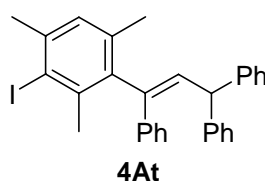

**4At**, obtained as a 98:2 mixture of *E/Z* isomers, white solid; m.p. 70 °C; <sup>1</sup>H NMR (300 MHz, CDCl<sub>3</sub>): δ 7.40-7.09 (m, 15H), 6.94 (s, 1H), 5.91 (d, *J* = 10.5 Hz, 1H), 5.29 (d, *J* = 10.5 Hz, 1H), 2.43 (s, 3H), 2.34 (s, 3H), 2.02 (s, 3H); Partial <sup>1</sup>H NMR for the minor *Z*-isomer: 4.35 (d, *J* = 10.5 Hz, 1H); <sup>13</sup>C NMR (75 MHz, CDCl<sub>3</sub>): δ 144.7, 144.6, 141.2, 140.9, 139.8, 139.7, 138.6, 136.3, 133.8, 129.0, 128.8, 128.4, 128.3, 127.4, 126.6, 126.5, 106.6, 50.6, 30.0, 28.0, 20.4; HRMS (EI): Calcd for C<sub>30</sub>H<sub>27</sub>I (M): 514.1157. Found: 514.1154.



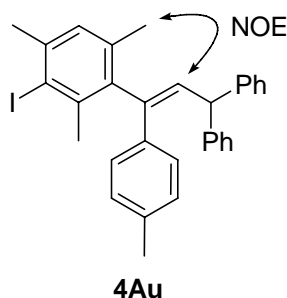

**4Au**, obtained as a 99:1 mixture of *E/Z* isomers, white solid; m.p. 61 °C;  $^1\text{H}$  NMR (300 MHz,  $\text{CDCl}_3$ ):  $\delta$  7.35-7.10 (m, 10H), 7.07 (d,  $J = 8.1$  Hz, 2H), 7.01 (d,  $J = 8.1$  Hz, 2H), 6.93 (s, 1H), 5.86 (d,  $J = 10.5$  Hz, 1H), 5.29 (d,  $J = 10.5$  Hz, 1H), 2.42 (s, 3H), 2.34 (s, 3H), 2.32 (s, 3H), 2.01 (s, 3H); Partial  $^1\text{H}$  NMR for the minor *Z*-isomer: 6.55 (d,  $J = 10.5$  Hz, 1H), 4.32 (d,  $J = 10.5$  Hz, 1H);  $^{13}\text{C}$  NMR (75 MHz,  $\text{CDCl}_3$ ):  $\delta$  144.8, 144.7, 141.4, 140.7, 139.8, 139.6, 137.1, 136.3, 135.6, 133.2, 129.0, 128.8, 128.7, 128.4, 126.5, 106.6, 50.6, 30.0, 27.9, 21.3, 20.3; HRMS (EI): Calcd for  $\text{C}_{31}\text{H}_{29}\text{I}$  (M): 528.1314. Found: 528.1309.

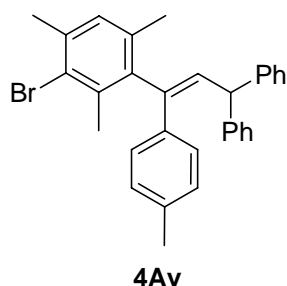

**4Av**, obtained as a 93:7 mixture of *E/Z* isomers, white solid; m.p. 42 °C;  $^1\text{H}$  NMR (300 MHz,  $\text{CDCl}_3$ ):  $\delta$  7.36-7.13 (m, 10H), 7.04 (d,  $J = 8.4$  Hz, 2H), 6.99 (d,  $J = 8.4$  Hz, 2H), 6.91 (s, 1H), 5.88 (d,  $J = 10.5$  Hz, 1H), 5.29 (d,  $J = 10.5$  Hz, 1H), 2.36 (s, 3H), 2.32 (s, 3H), 2.25 (s, 3H), 2.01 (s, 3H); Partial  $^1\text{H}$  NMR for the minor *Z*-isomer: 6.82 (d,  $J = 10.5$  Hz, 1H), 4.36 (d,  $J = 10.5$  Hz, 1H); HRMS (EI): Calcd for  $\text{C}_{31}\text{H}_{29}\text{Br}$  (M): 480.1453. Found: 480.1444.

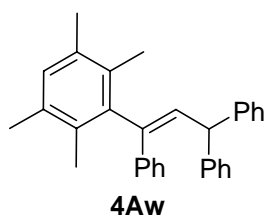

**4Aw**, obtained as a 96:4 mixture of *E/Z* isomers, white solid; m.p. 115 °C;  $^1\text{H}$  NMR (300 MHz,  $\text{CDCl}_3$ ):  $\delta$  7.35-7.10 (m, 15H), 6.90 (s, 1H), 5.93 (d,  $J = 10.5$  Hz, 1H), 5.30 (d,  $J = 10.5$  Hz, 1H), 2.19 (s, 6H), 2.02 (s, 6H); Partial  $^1\text{H}$  NMR for the minor *Z*-isomer: 4.35 (d,  $J = 10.5$  Hz, 1H);  $^{13}\text{C}$  NMR (75 MHz,  $\text{CDCl}_3$ ):  $\delta$  145.0, 143.3, 142.4, 140.3, 139.3, 133.8, 133.0, 132.3, 130.5, 129.8, 129.0, 128.7, 128.5, 128.2, 127.6, 127.4, 127.1, 126.4, 50.7, 20.3, 17.0; HRMS (EI): Calcd for  $\text{C}_{31}\text{H}_{30}$  (M): 402.2348. Found: 402.2342.

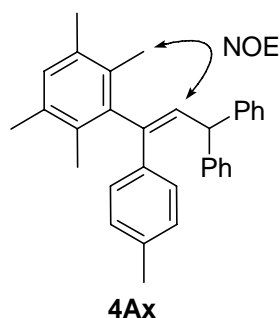

**4Ax**, obtained as a 97:3 mixture of *E/Z* isomers, white solid; m.p. 118 °C;  $^1\text{H}$  NMR (300 MHz,  $\text{CDCl}_3$ ):  $\delta$  7.40-7.15 (m, 10H), 7.08-6.99 (m, 4H), 6.89 (s, 1H), 5.88 (d,  $J = 10.5$  Hz, 1H), 5.30 (d,  $J = 10.5$  Hz, 1H), 2.31 (s, 3H), 2.18 (s, 6H), 2.01 (s, 6H); Partial  $^1\text{H}$  NMR for the minor *Z*-isomer: 6.81 (d,  $J = 10.5$  Hz, 1H), 4.33 (d,  $J = 10.5$  Hz, 1H);  $^{13}\text{C}$  NMR (75 MHz,  $\text{CDCl}_3$ ):  $\delta$  145.1, 143.5, 140.2, 136.8, 136.4, 133.7, 132.5, 132.3, 130.4, 129.0, 128.9, 128.6, 128.5, 127.6, 127.4, 126.3, 50.7, 21.3, 20.3, 17.0; HRMS (EI): Calcd for  $\text{C}_{32}\text{H}_{32}$  (M): 416.2504. Found: 416.2496.

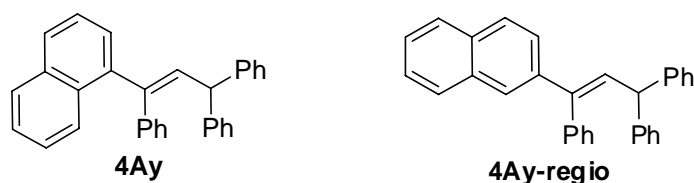

**4Ay**, obtained as a 93:7 mixture of regioisomers (**4Ay-regio** is the minor one) and as a 93:7 mixture of *E/Z* isomers, yellow oil;  $^1\text{H}$  NMR (300 MHz,  $\text{CDCl}_3$ ):  $\delta$  7.88-7.74 (m, 3H), 7.45-7.12 (m, 19H), 6.37 (d,  $J = 10.8$  Hz, 1H), 5.24 (d,  $J = 10.8$  Hz, 1H); Partial  $^1\text{H}$  NMR for the minor regioisomer: 6.64 (d,  $J = 10.8$  Hz, 1H), 4.86 (d,  $J = 10.8$  Hz, 1H); Partial  $^1\text{H}$  NMR for the minor *Z*-isomer: 6.85 (d,  $J = 10.8$  Hz, 1H), 4.46 (d,  $J = 10.8$  Hz, 1H); HRMS (EI): Calcd for  $\text{C}_{31}\text{H}_{24}$  (M): 396.1878. Found: 396.1880.

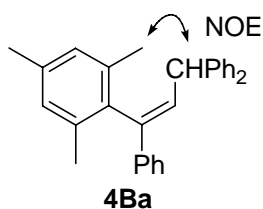

**4Ba**, obtained as a 97:3 mixture of *Z/E* isomers, white solid; m.p. 83 °C;  $^1\text{H}$  NMR (300 MHz,  $\text{CDCl}_3$ ):  $\delta$  7.33-7.08 (m, 15H), 6.89 (s, 2H), 6.86 (d,  $J = 10.2$  Hz, 1H), 4.44 (d,  $J = 10.2$  Hz, 1H), 2.33 (s, 3H), 1.86 (s, 6H); Partial  $^1\text{H}$  NMR for the minor *E*-isomer: 5.95 (d,  $J = 10.2$  Hz, 1H), 5.28 (d,  $J = 10.2$  Hz, 1H);  $^{13}\text{C}$  NMR (75 MHz,  $\text{CDCl}_3$ ):  $\delta$  144.5, 140.2, 139.7, 136.8, 135.3, 130.4, 129.7, 129.0, 128.5, 128.4, 127.3, 126.8, 126.3, 126.1, 50.8, 21.3, 20.6, 20.0; HRMS (EI): Calcd for  $\text{C}_{30}\text{H}_{28}$  (M): 388.2191. Found: 388.2188.

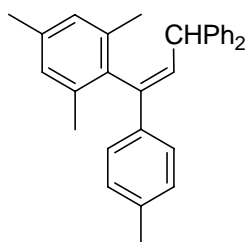

**4Bb**

**4Bb**, obtained as a 97:3 mixture of *Z/E* isomers, yellow oil;  $^1\text{H}$  NMR (300 MHz,  $\text{CDCl}_3$ ):  $\delta$  7.30-6.99 (m, 14H), 6.88 (s, 2H), 6.81 (d,  $J = 10.5$  Hz, 1H), 4.42 (d,  $J = 10.5$  Hz, 1H), 2.33 (s, 3H), 2.30 (s, 3H), 1.85 (s, 6H); Partial  $^1\text{H}$  NMR for the minor *E*-isomer: 5.91 (d,  $J = 10.5$  Hz, 1H), 5.28 (d,  $J = 10.5$  Hz, 1H);  $^{13}\text{C}$  NMR (75 MHz,  $\text{CDCl}_3$ ):  $\delta$  144.7, 139.5, 137.3, 137.1, 136.8, 136.6, 135.4, 129.5, 129.3, 128.9, 128.6, 128.5, 128.4, 128.0, 126.2, 126.0, 50.7, 21.3, 21.2, 20.0; HRMS (EI): Calcd for  $\text{C}_{31}\text{H}_{30}$  (M): 402.2348. Found: 402.2343.

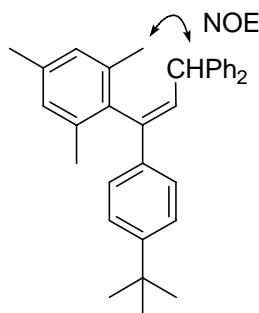

**4Bc**

**4Bc**, obtained as a 97:3 mixture of *Z/E* isomers, white solid; m.p. 135 °C;  $^1\text{H}$  NMR (300 MHz,  $\text{CDCl}_3$ ):  $\delta$  7.30-6.99 (m, 14H), 6.88 (s, 2H), 6.82 (d,  $J = 10.5$  Hz, 1H), 4.42 (d,  $J = 10.5$  Hz, 1H), 2.33 (s, 3H), 1.86 (s, 6H), 1.28 (s, 9H); Partial  $^1\text{H}$  NMR for the minor *E*-isomer: 5.92 (d,  $J = 10.5$  Hz, 1H), 5.32 (d,  $J = 10.5$  Hz, 1H);  $^{13}\text{C}$  NMR (75 MHz,  $\text{CDCl}_3$ ):  $\delta$  150.2, 144.7, 139.5, 137.3, 136.8, 136.6, 135.4, 129.6, 128.6, 128.5, 128.4, 128.0, 126.2, 125.8, 125.4, 125.1, 50.7, 34.6, 31.4, 21.3, 20.1; HRMS (EI): Calcd for  $\text{C}_{34}\text{H}_{36}$  (M): 444.2817. Found: 444.2811.

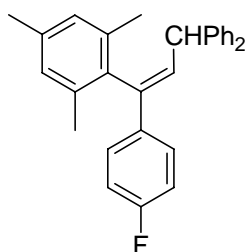

**4Bf**

**4Bf**, obtained as a 94:6 mixture of *Z/E* isomers, white solid; m.p. 72 °C;  $^1\text{H}$  NMR (300 MHz,  $\text{CDCl}_3$ ):  $\delta$  7.30-7.05 (m, 12H), 6.97-6.85 (m, 4H), 6.78 (d,  $J = 10.5$  Hz, 1H), 4.41 (d,  $J = 10.5$  Hz, 1H), 2.34 (s, 3H), 1.84 (s, 6H); Partial  $^1\text{H}$  NMR for the minor *E*-isomer: 5.94 (d,  $J = 10.5$  Hz, 1H), 5.20 (d,  $J = 10.5$  Hz, 1H), 2.27 (s, 3H), 2.04 (s,

3H); HRMS (EI): Calcd for C<sub>30</sub>H<sub>27</sub>F (M): 406.2097. Found: 406.2094.

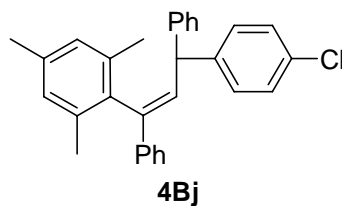

**4Bj**, obtained as a 93:7 mixture of *Z/E* isomers, white solid; m.p. 40 °C; <sup>1</sup>H NMR (300 MHz, CDCl<sub>3</sub>): δ 7.34-6.98 (m, 14H), 6.89 (s, 2H), 6.78 (d, *J* = 10.5 Hz, 1H), 4.40 (d, *J* = 10.5 Hz, 1H), 2.33 (s, 3H), 1.85 (s, 6H); Partial <sup>1</sup>H NMR for the minor *E*-isomer: 5.90 (d, *J* = 10.5 Hz, 1H), 5.24 (d, *J* = 10.5 Hz, 1H), 2.26 (s, 3H), 2.05 (s, 3H); HRMS (EI): Calcd for C<sub>30</sub>H<sub>27</sub>Cl (M): 422.1801. Found: 422.1794.

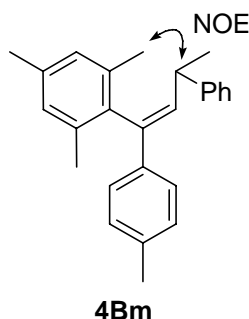

**4Bm**, obtained as a 99:1 mixture of *Z/E* isomers, white solid; m.p. 98 °C; <sup>1</sup>H NMR (300 MHz, CDCl<sub>3</sub>): δ 7.33-6.98 (m, 9H), 6.95 (s, 1H), 6.86 (s, 1H), 6.41 (d, *J* = 9.9 Hz, 1H), 3.28-3.09 (m, 1H), 2.34 (s, 3H), 2.29 (s, 3H), 2.16 (s, 3H), 1.74 (s, 3H), 1.32 (d, *J* = 6.9 Hz, 3H); Partial <sup>1</sup>H NMR for the minor *E*-isomer: 5.66 (d, *J* = 9.9 Hz, 1H); <sup>13</sup>C NMR (75 MHz, CDCl<sub>3</sub>): δ 146.4, 137.6, 137.5, 136.8, 136.7, 136.4, 136.1, 135.9, 132.3, 129.2, 128.5, 128.4, 128.2, 127.1, 126.0, 125.9, 40.2, 22.7, 21.3, 21.2, 20.2, 19.9; HRMS (EI): Calcd for C<sub>26</sub>H<sub>28</sub> (M): 340.2191. Found: 340.2184.

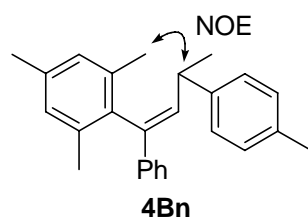

**4Bn**, obtained as a 98:2 mixture of *Z/E* isomers, yellow oil; <sup>1</sup>H NMR (300 MHz, CDCl<sub>3</sub>): δ 7.35-7.10 (m, 5H), 7.10-6.92 (m, 5H), 6.88 (s, 1H), 6.43 (d, *J* = 9.9 Hz, 1H), 3.26-3.11 (m, 1H), 2.34 (s, 3H), 2.29 (s, 3H), 2.16 (s, 3H), 1.78 (s, 3H), 1.31 (d, *J* = 6.9 Hz, 3H); Partial <sup>1</sup>H NMR for the minor *E*-isomer: 5.69 (d, *J* = 9.9 Hz, 1H); <sup>13</sup>C NMR (75 MHz, CDCl<sub>3</sub>): δ 143.2, 140.4, 137.5, 136.9, 136.5, 136.2, 135.8, 135.5, 133.5, 129.2, 128.4, 128.3, 127.0, 126.0, 39.8, 22.6, 21.3, 21.1, 20.2, 20.0; HRMS (EI): Calcd for C<sub>26</sub>H<sub>28</sub> (M): 340.2191. Found: 340.2192.

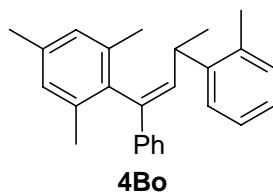

**4Bo**, obtained as a 97:3 mixture of *Z/E* isomers, white solid; m.p. 131 °C;  $^1\text{H}$  NMR (300 MHz,  $\text{CDCl}_3$ ):  $\delta$  7.33-7.07 (m, 7H), 7.07-6.88 (m, 3H), 6.79 (s, 1H), 6.64 (d,  $J = 9.6$  Hz, 1H), 3.52-3.37 (m, 1H), 2.32 (s, 3H), 2.18 (s, 3H), 1.78 (s, 3H), 1.47 (s, 3H), 1.29 (d,  $J = 6.9$  Hz, 3H); Partial  $^1\text{H}$  NMR for the minor *E*-isomer: 5.74 (d,  $J = 9.6$  Hz, 1H);  $^{13}\text{C}$  NMR (75 MHz,  $\text{CDCl}_3$ ):  $\delta$  145.2, 140.3, 138.2, 137.0, 136.5, 136.0, 135.9, 135.0, 133.4, 130.2, 128.5, 128.4, 128.2, 127.0, 126.6, 126.3, 126.0, 125.6, 35.2, 23.3, 21.2, 20.1, 19.3, 18.9; HRMS (EI): Calcd for  $\text{C}_{26}\text{H}_{28}$  (M): 340.2191. Found: 340.2184.

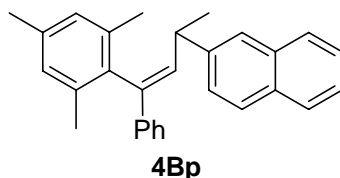

**4Bp**, obtained as a 95:5 mixture of *Z/E* isomers, yellow oil;  $^1\text{H}$  NMR (300 MHz,  $\text{CDCl}_3$ ):  $\delta$  7.83-7.69 (m, 3H), 7.52-7.34 (m, 3H), 7.34-7.11 (m, 6H), 6.98 (s, 1H), 6.87 (s, 1H), 6.54 (d,  $J = 9.9$  Hz, 1H), 3.46-3.32 (m, 1H), 2.36 (s, 3H), 2.20 (s, 3H), 1.70 (s, 3H), 1.42 (d,  $J = 6.9$  Hz, 3H); Partial  $^1\text{H}$  NMR for the minor *E*-isomer: 5.81 (d,  $J = 10.5$  Hz, 1H); HRMS (EI): Calcd for  $\text{C}_{29}\text{H}_{28}$  (M): 376.2191. Found: 376.2187.

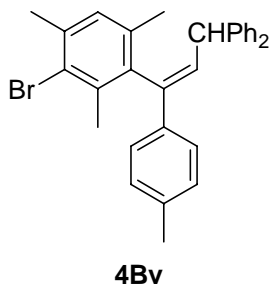

**4Bv**, obtained as a 96:4 mixture of *Z/E* isomers, white solid; m.p. 42 °C;  $^1\text{H}$  NMR (300 MHz,  $\text{CDCl}_3$ ):  $\delta$  7.30-7.02 (m, 14H), 7.00 (s, 1H), 6.82 (d,  $J = 10.2$  Hz, 1H), 4.36 (d,  $J = 10.2$  Hz, 1H), 2.44 (s, 3H), 2.30 (s, 3H), 2.00 (s, 3H), 1.81 (s, 3H); Partial  $^1\text{H}$  NMR for the minor *E*-isomer: 5.88 (d,  $J = 10.2$  Hz, 1H), 5.29 (d,  $J = 10.2$  Hz, 1H);  $^{13}\text{C}$  NMR (75 MHz,  $\text{CDCl}_3$ ):  $\delta$  144.3, 144.2, 139.7, 137.4, 137.1, 136.8, 135.6, 130.0, 129.4, 129.0, 128.7, 128.6, 128.4, 128.3, 126.4, 126.0, 50.8, 24.1, 21.4, 21.2, 19.8; HRMS (EI): Calcd for  $\text{C}_{31}\text{H}_{29}\text{Br}$  (M): 480.1453. Found: 480.1448.

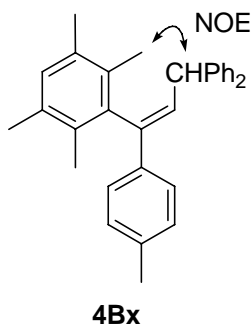

**4Bx**, obtained as a 98:2 mixture of *Z/E* isomers, white solid; m.p. 110 °C; <sup>1</sup>H NMR (300 MHz, CDCl<sub>3</sub>): δ 7.32-7.10 (m, 10H), 7.10-6.98 (m, 4H), 6.97 (s, 1H), 6.81 (d, *J* = 10.2 Hz, 1H), 4.33 (d, *J* = 10.2 Hz, 1H), 2.30 (s, 3H), 2.20 (s, 6H), 1.75 (s, 6H); Partial <sup>1</sup>H NMR for the minor *Z/E* isomer: 5.88 (d, *J* = 10.2 Hz, 1H), 5.30 (d, *J* = 10.2 Hz, 1H); <sup>13</sup>C NMR (75 MHz, CDCl<sub>3</sub>): δ 144.6, 141.0, 137.6, 137.0, 133.8, 132.5, 130.4, 129.4, 129.2, 129.0, 128.6, 128.5, 128.4, 126.2, 126.1, 50.7, 21.2, 20.3, 16.6; HRMS (EI): Calcd for C<sub>32</sub>H<sub>32</sub> (M): 416.2504. Found: 416.2498.

**Reaction of (*R*)-1-phenylethanol with phenylacetylene (**1a**) and mesitylene (**3a**)**

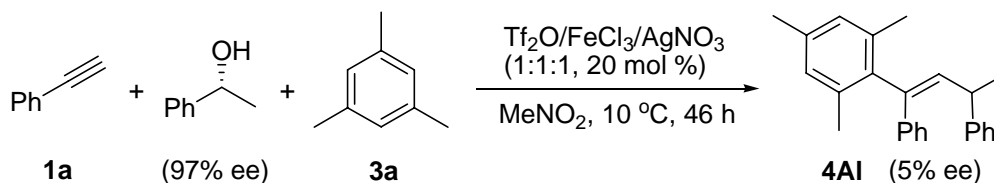

To a stirred solution of phenylacetylene (**1a**, 20.4 mg, 22 μL, 0.20 mmol) in nitromethane (0.20 mL) at 10 °C were added successively mesitylene (**3a**, 48.0 mg, 55 μL, 0.40 mmol), (*R*)-1-phenylethanol (97% ee, 36.6 mg, 0.30 mmol), AgNO<sub>3</sub> (6.8 mg, 20 mol %), FeCl<sub>3</sub> (6.6 mg, 20 mol %), and Tf<sub>2</sub>O (11.3 mg, 20 mol %). The resulting mixture was stirred at 10 °C for 46 h. The mixture was directly purified by silica gel column chromatography, eluting with petroleum ether, to give alkene **4AI** (31.1 mg, 47%) as a 96:4 mixture of *E/Z* isomers. The ee of alkene **4AI** was determined to be 5% by chiral HPLC [Chiralpak OD column, *n*-hexane/*i*-PrOH = 99.9:0.1, flow rate = 0.4 mL/min, *t*<sub>1</sub> = 17.4 min (minor), *t*<sub>2</sub> = 18.7 min (major)].

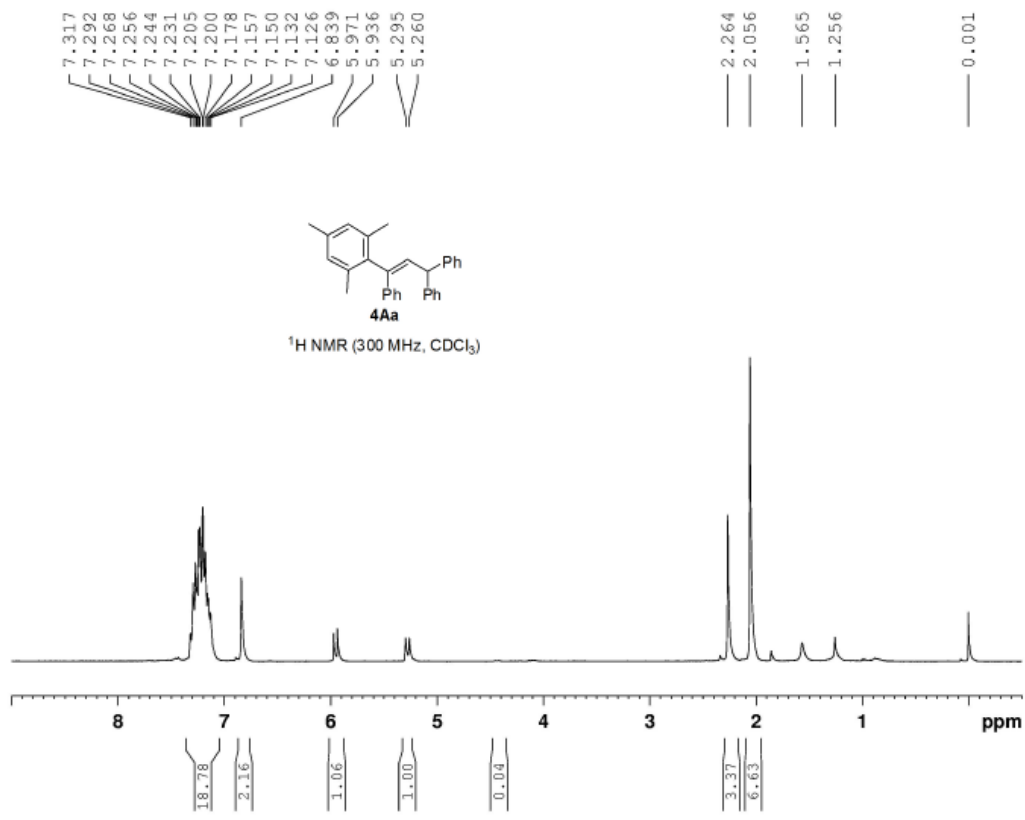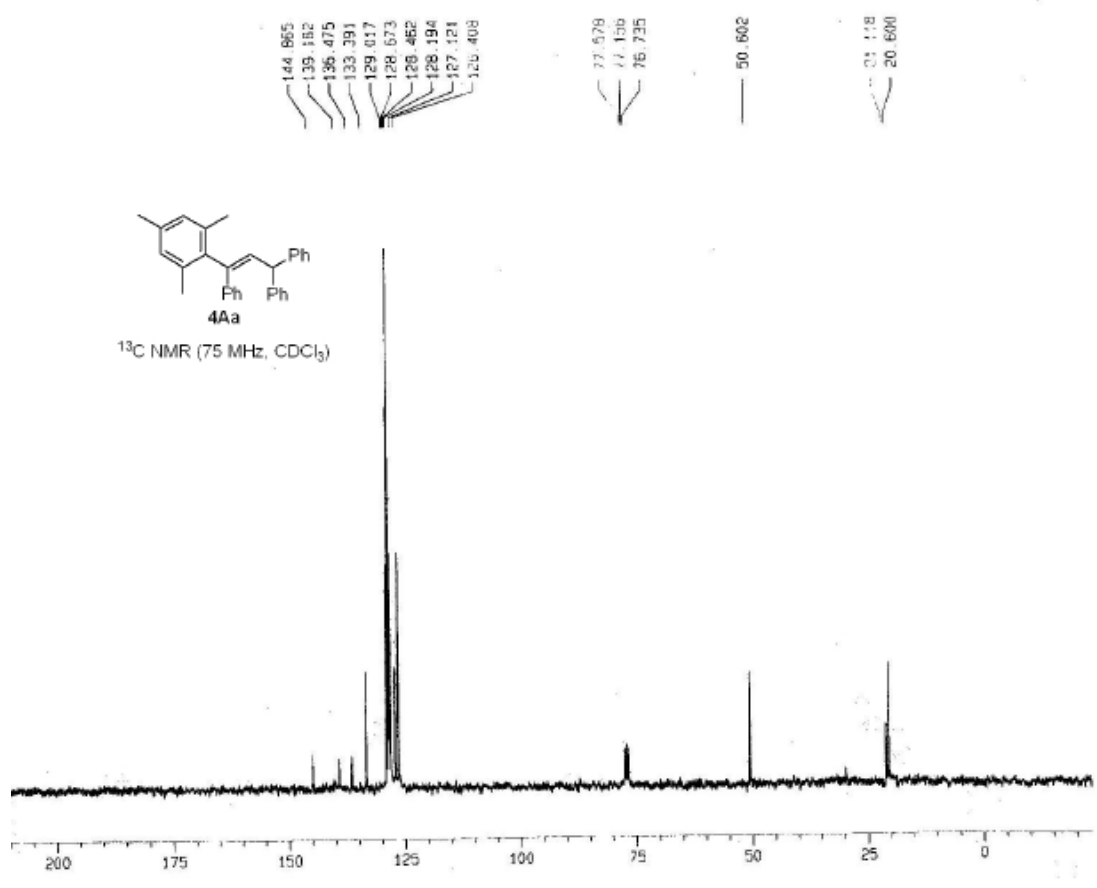

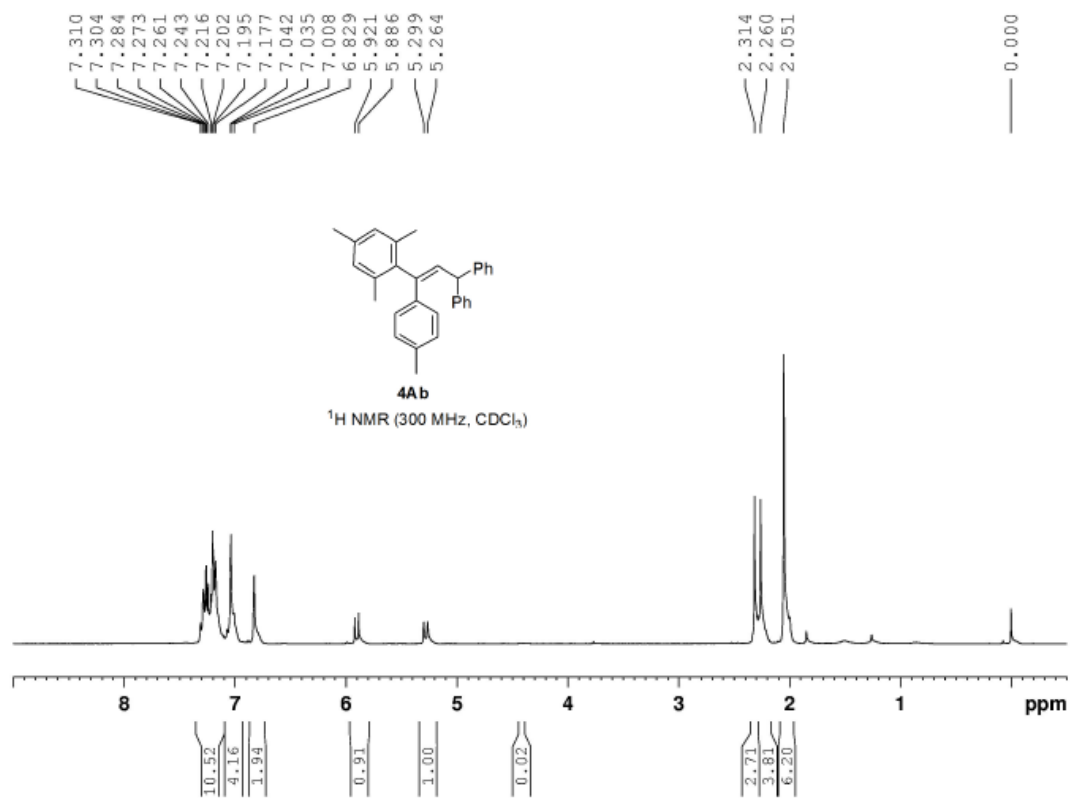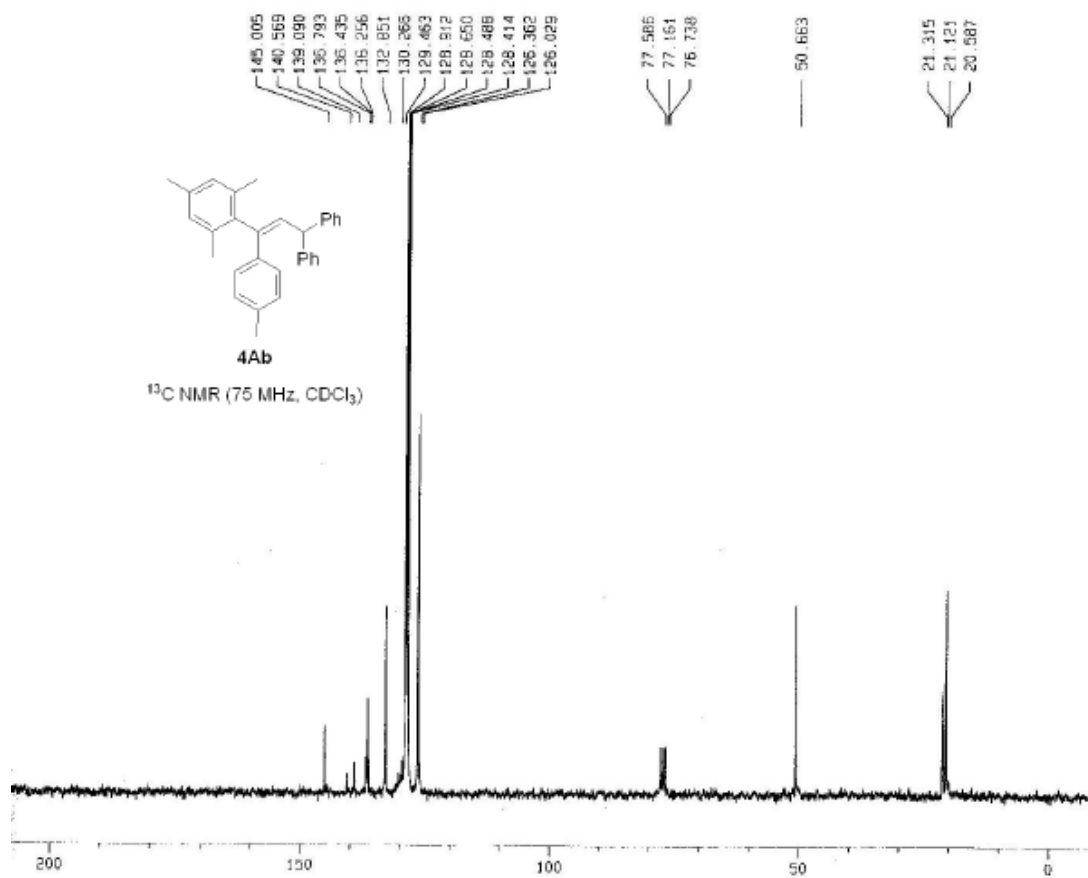



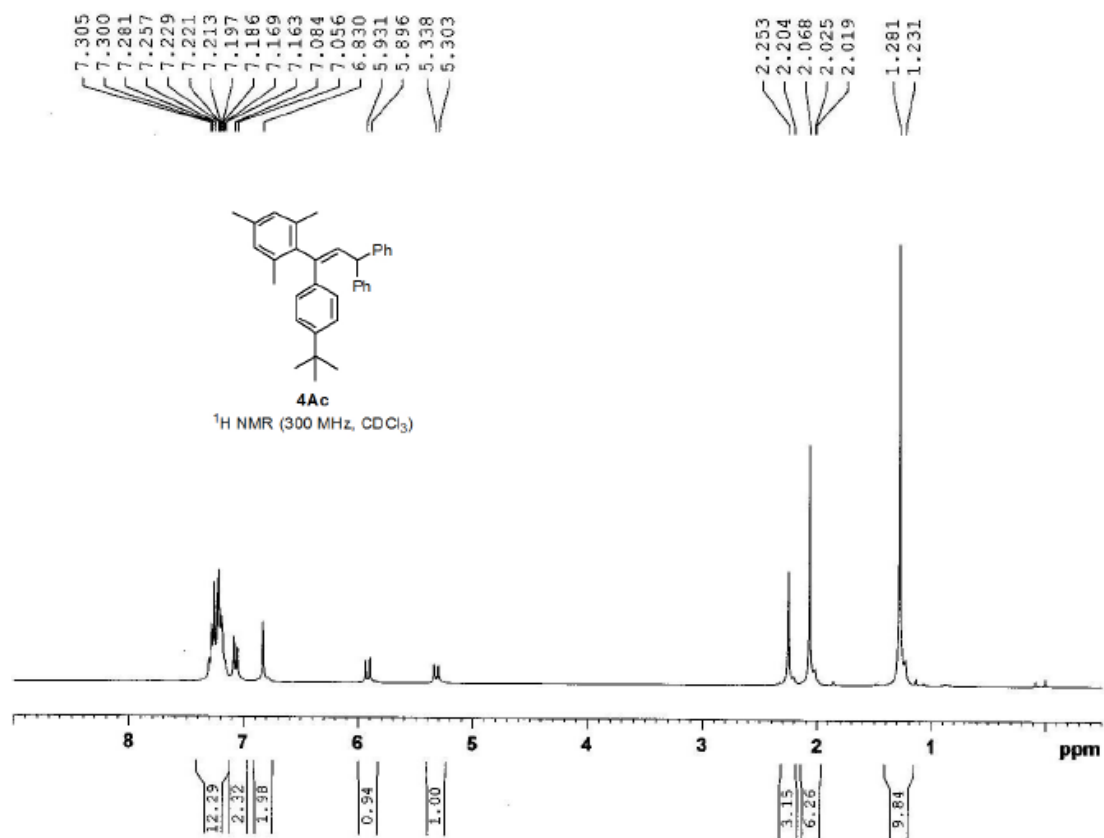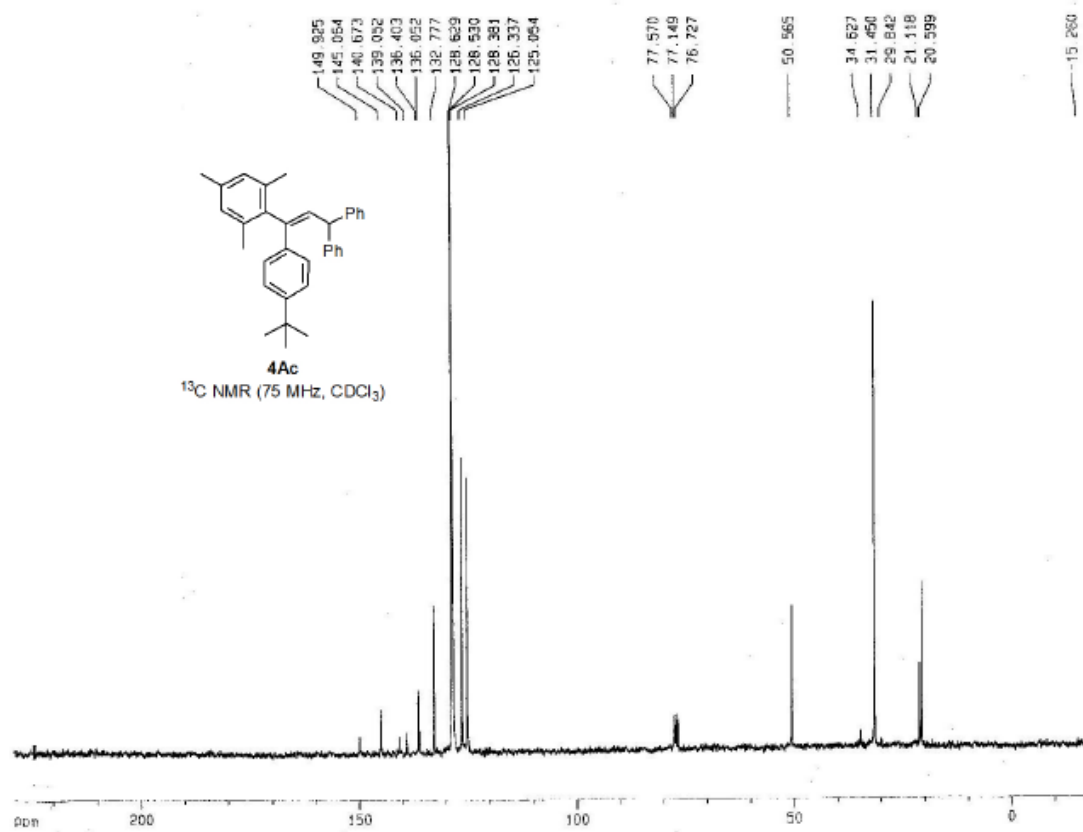

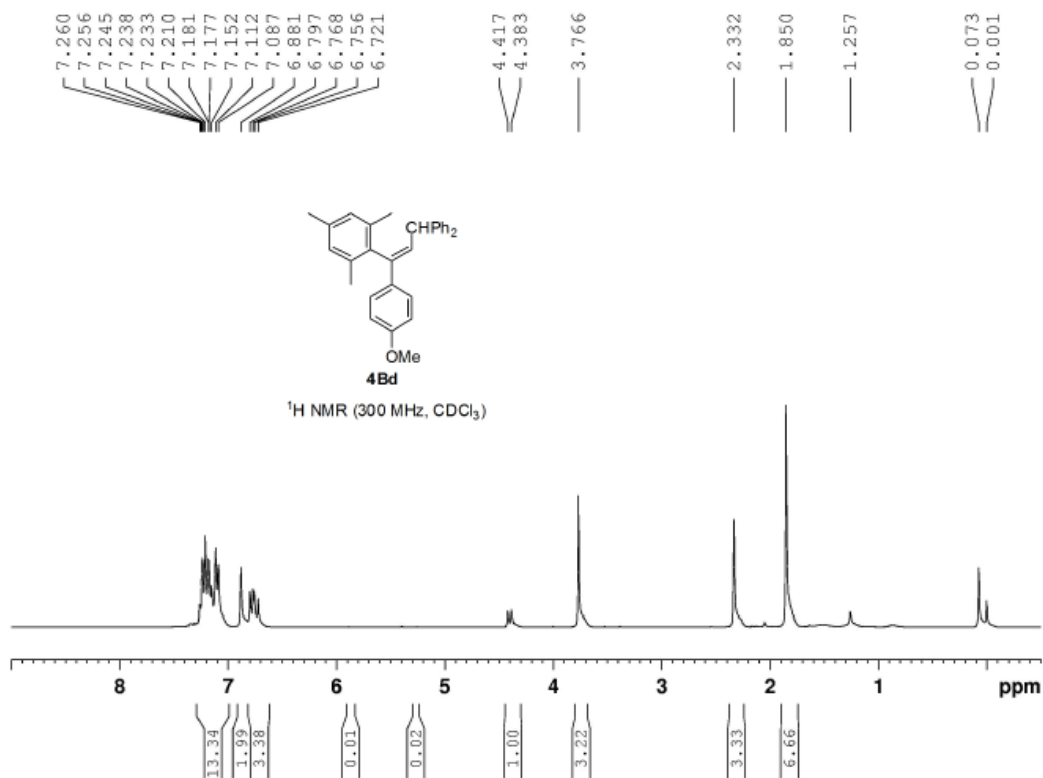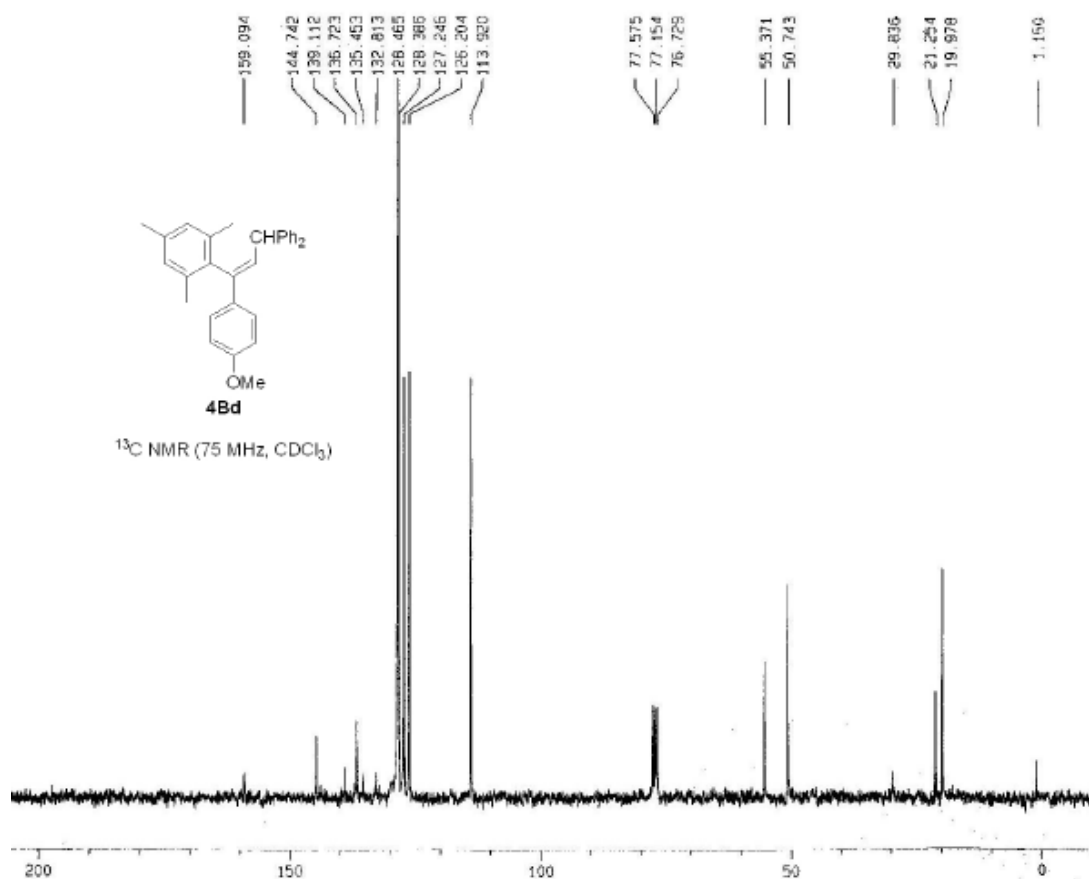

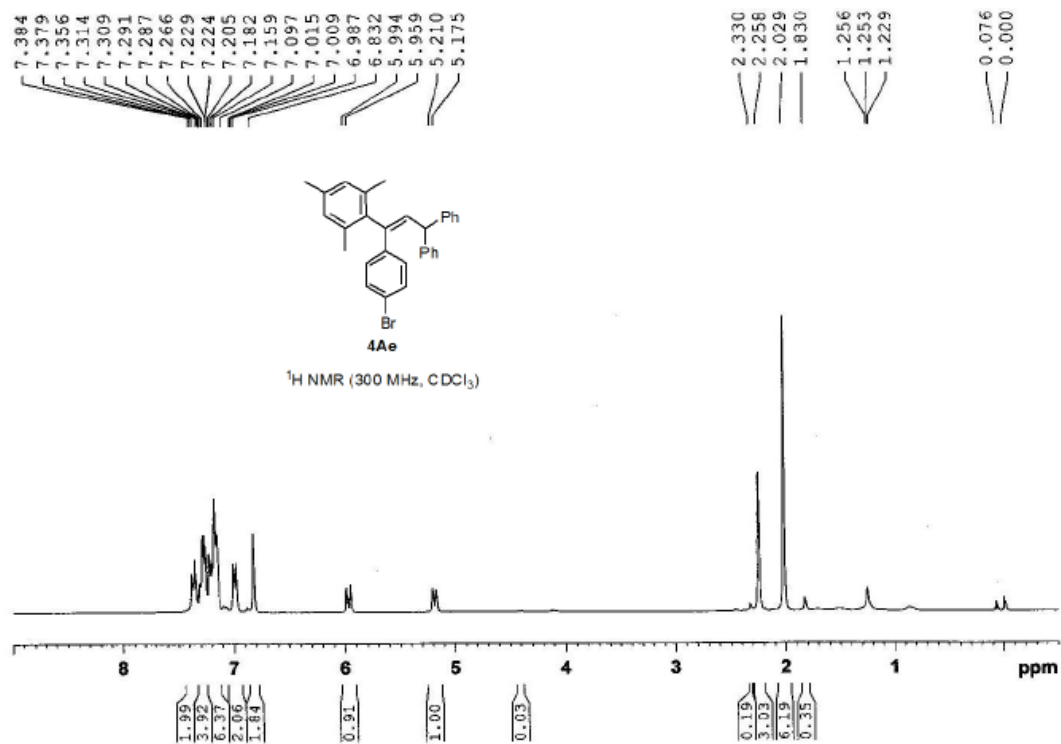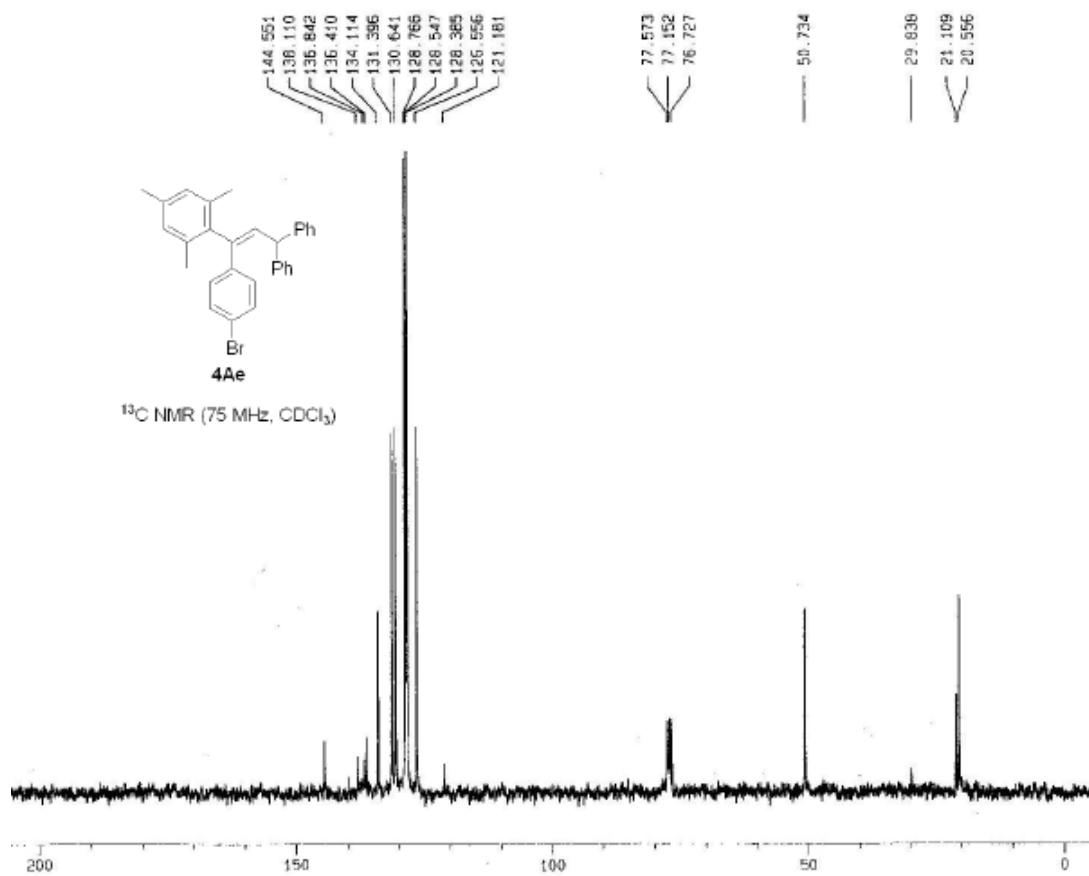

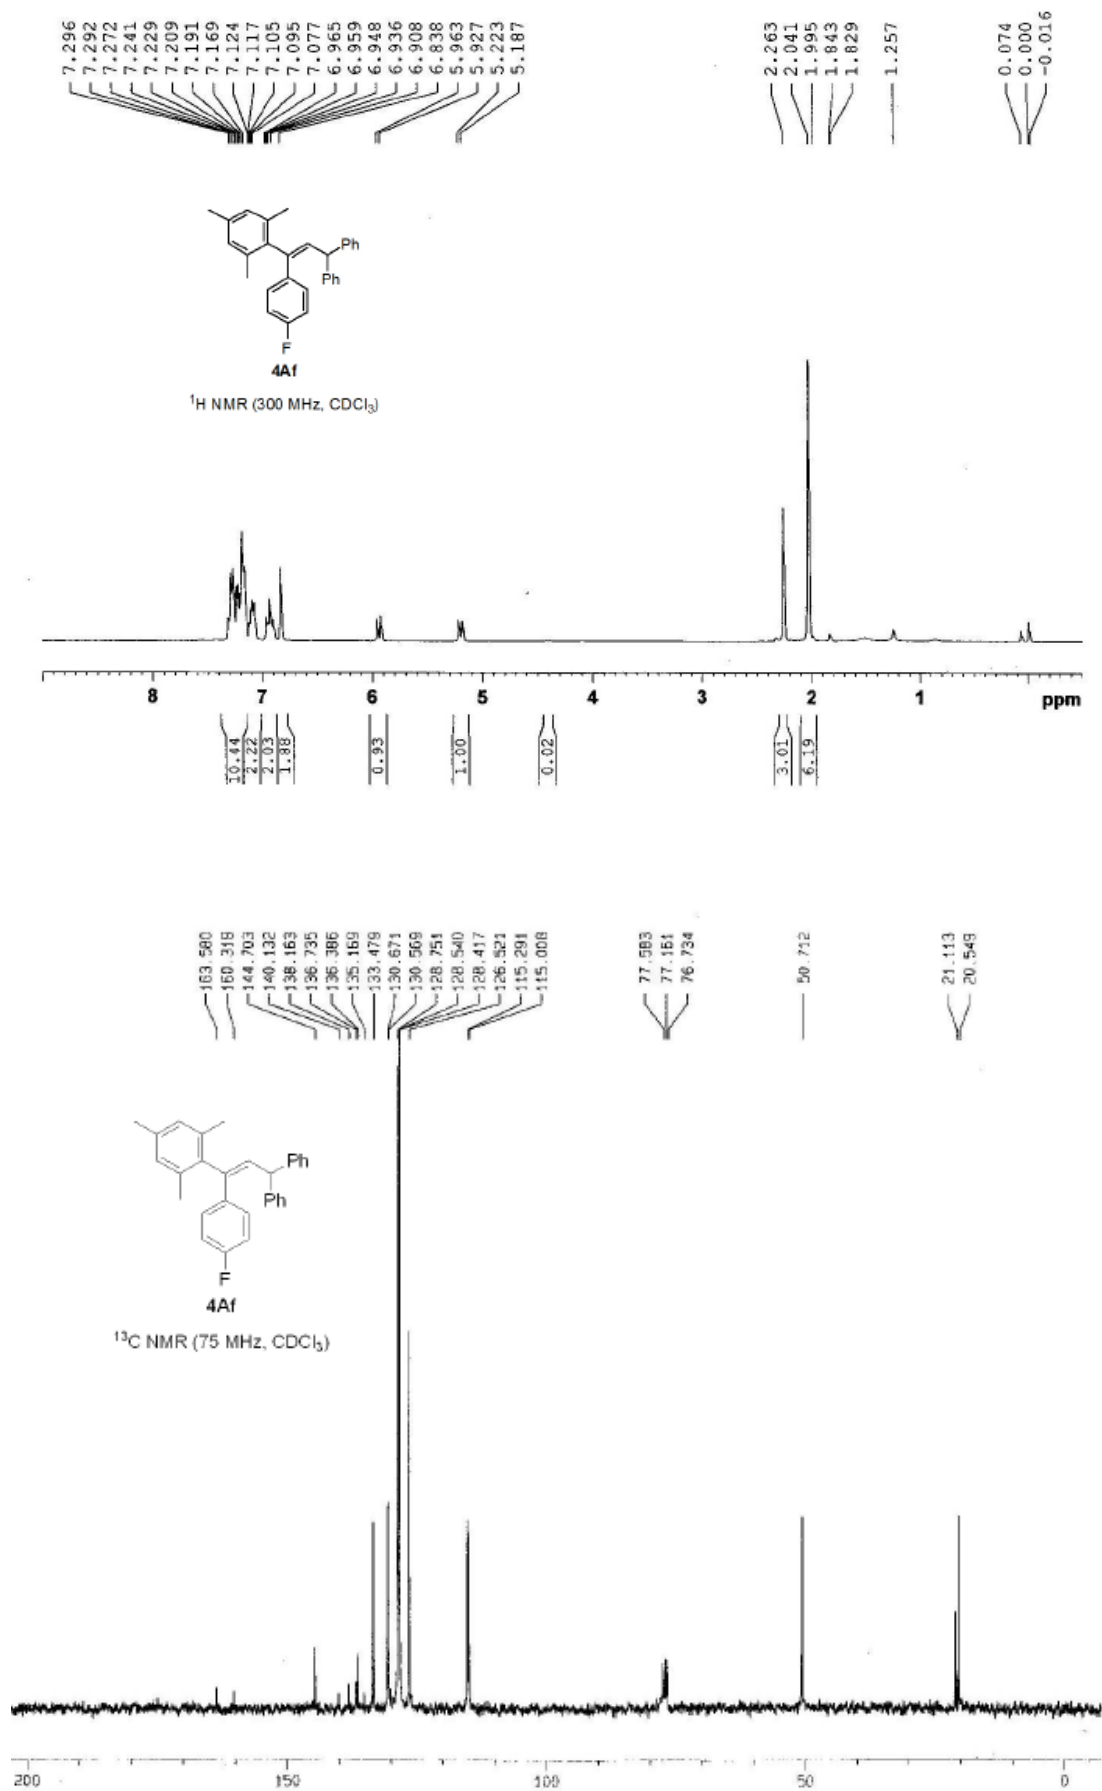

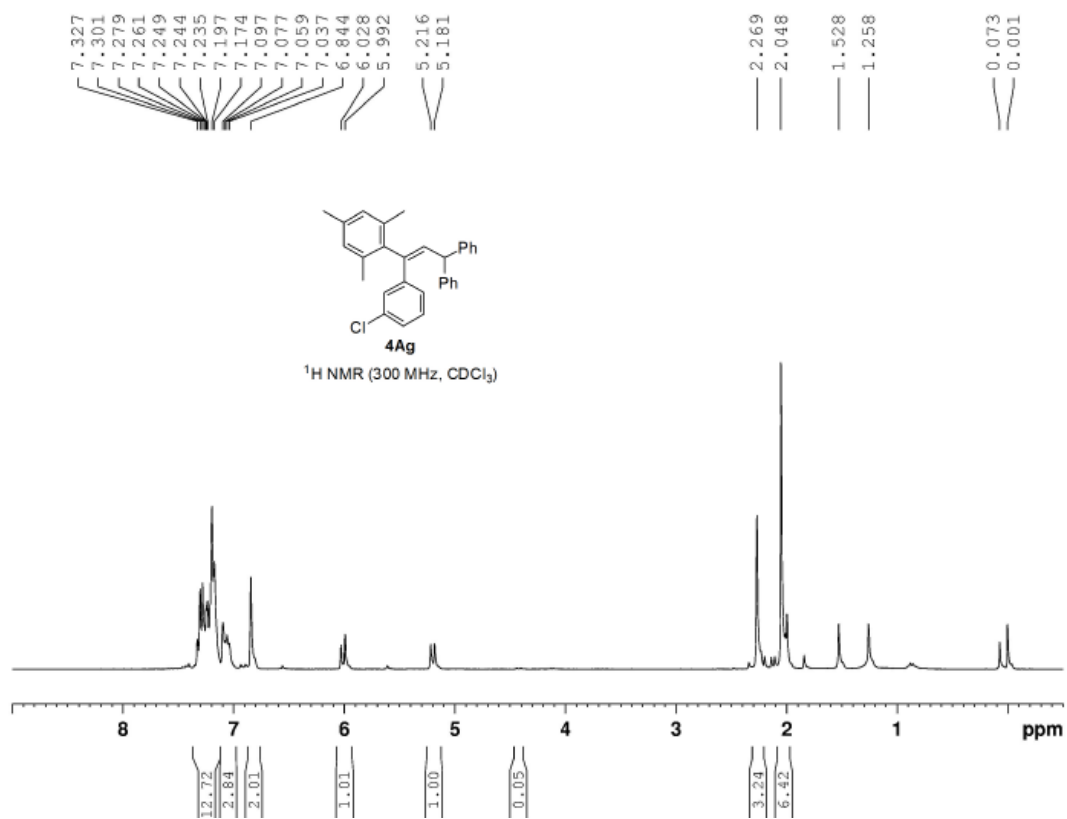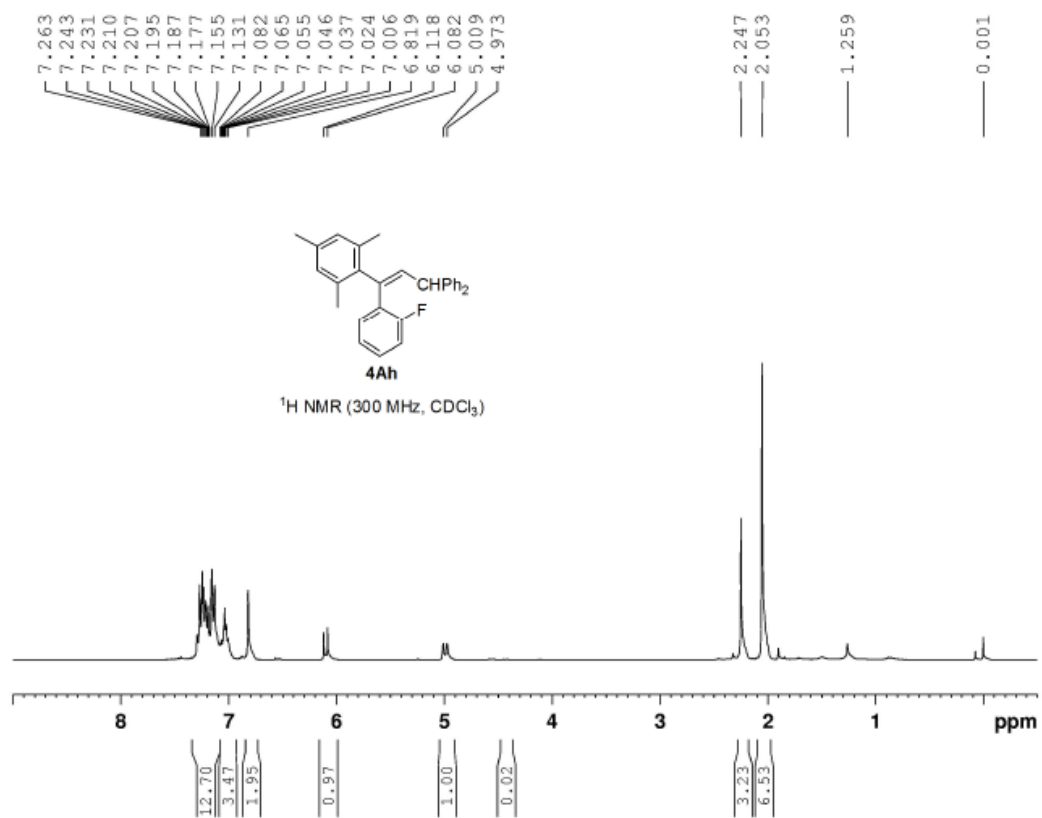

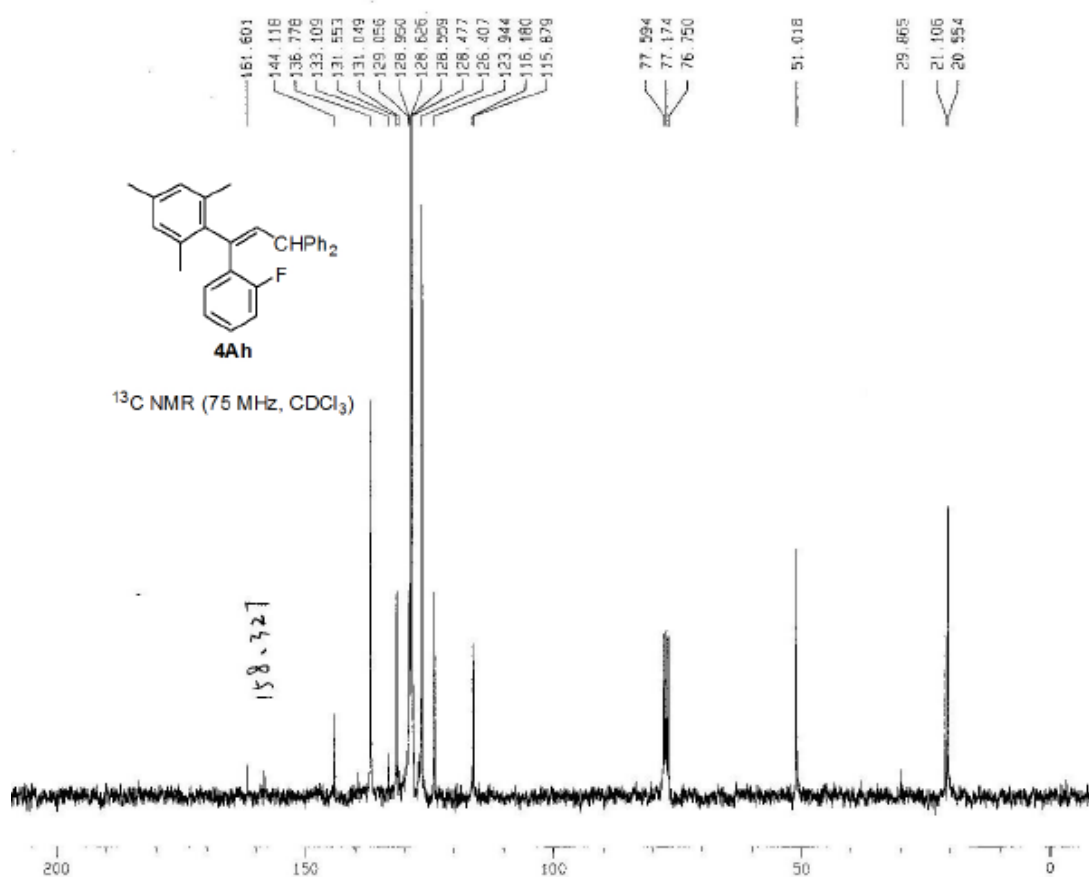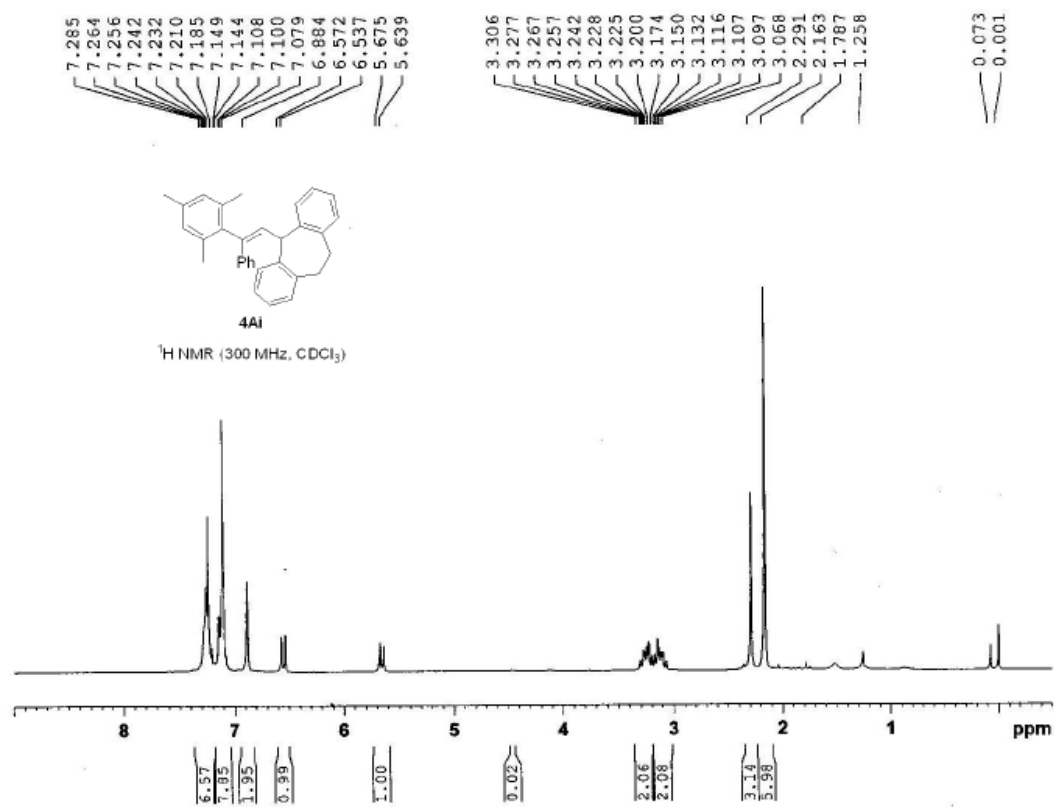

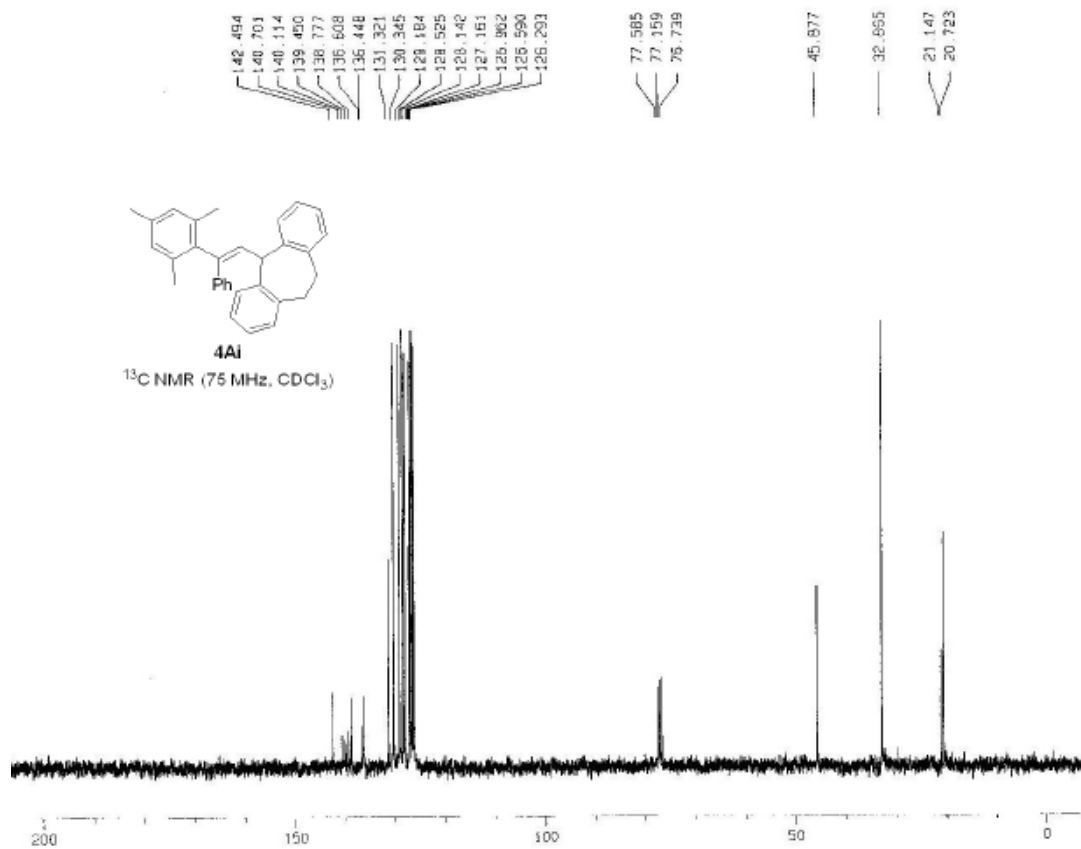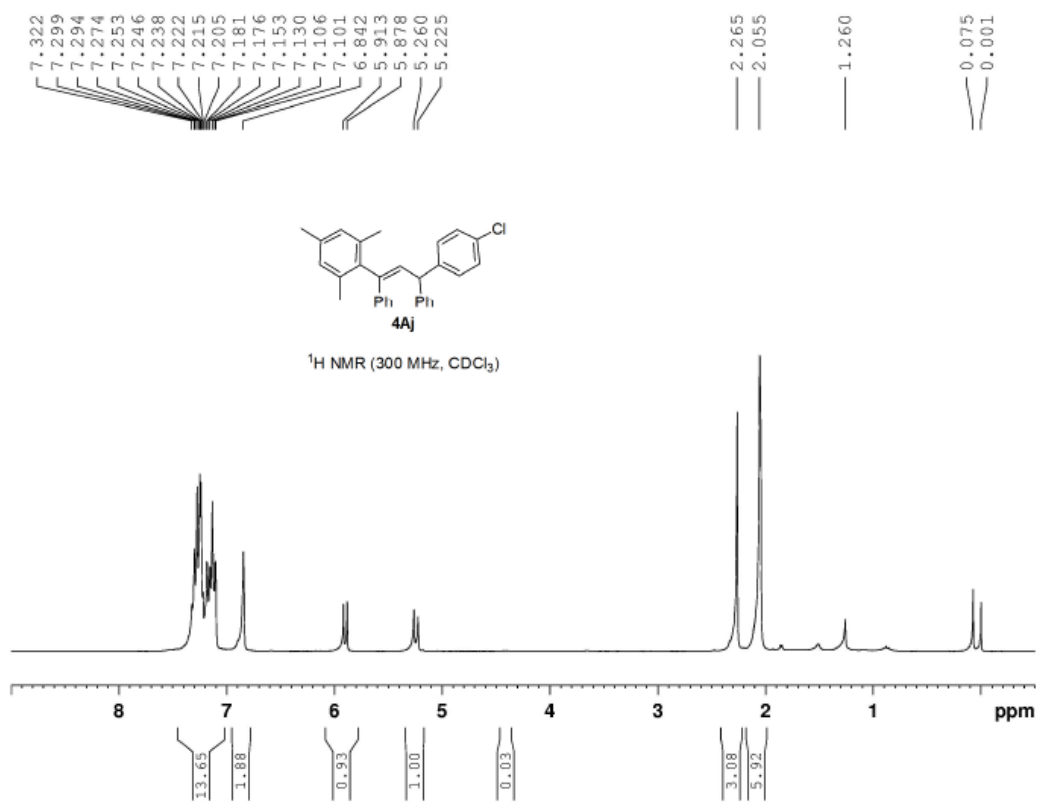

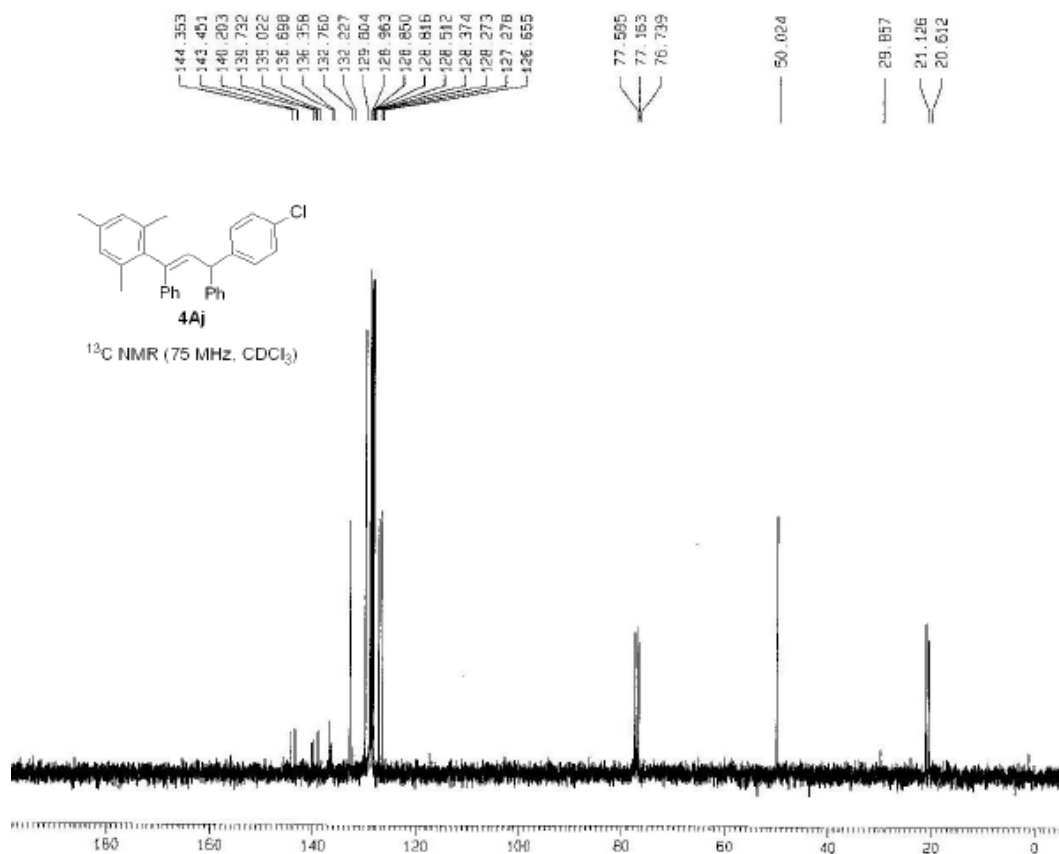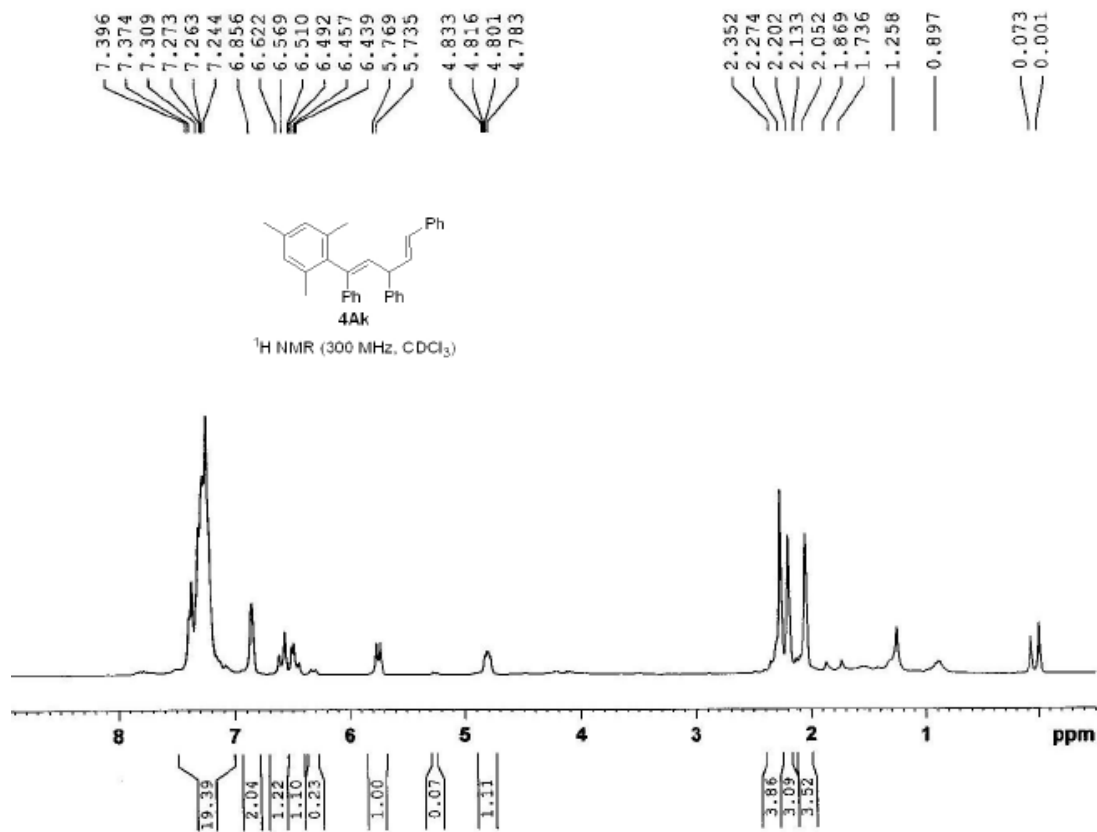



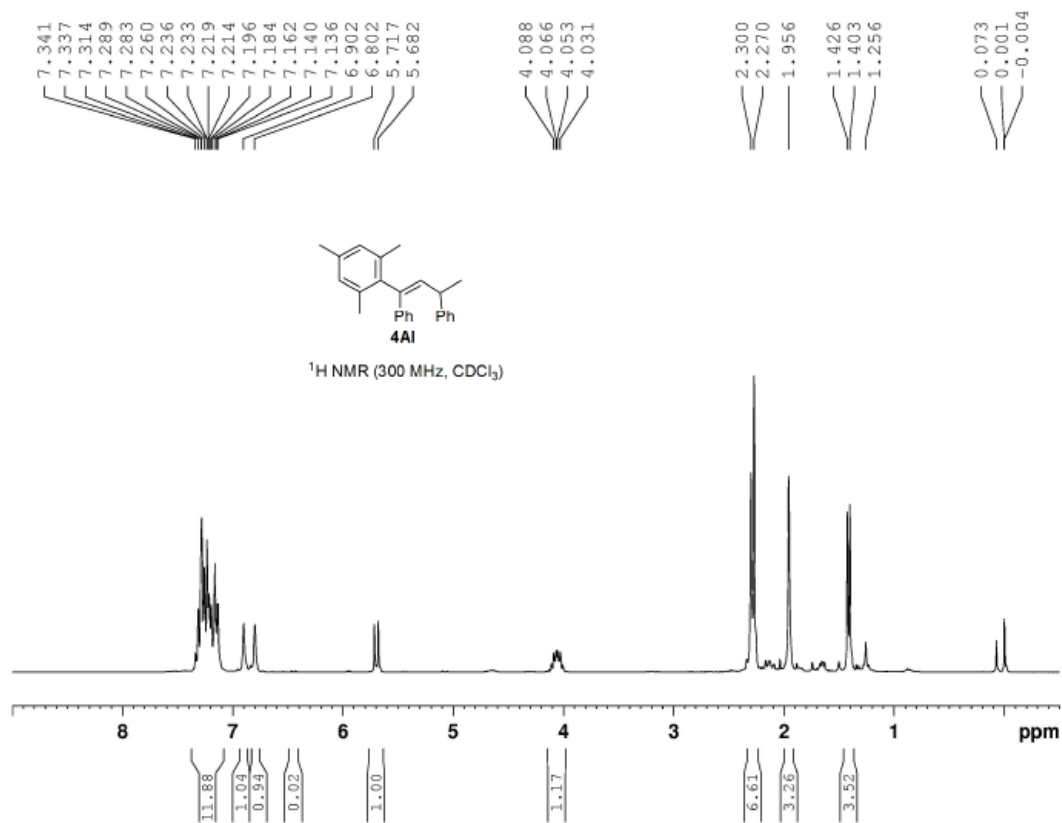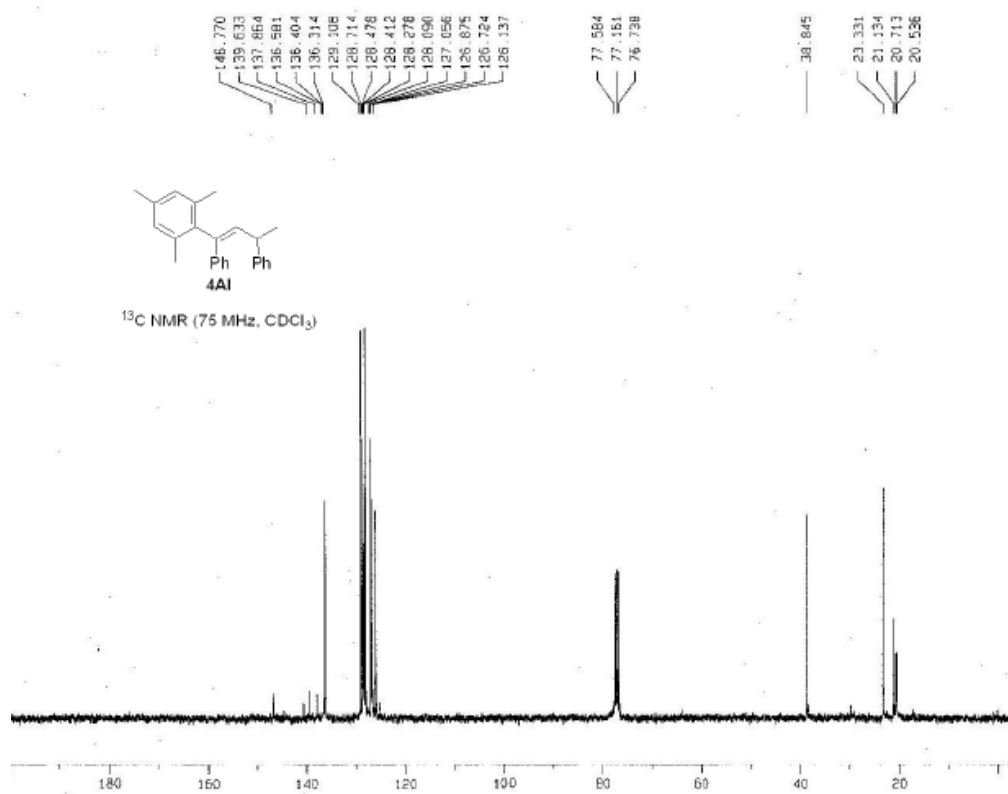

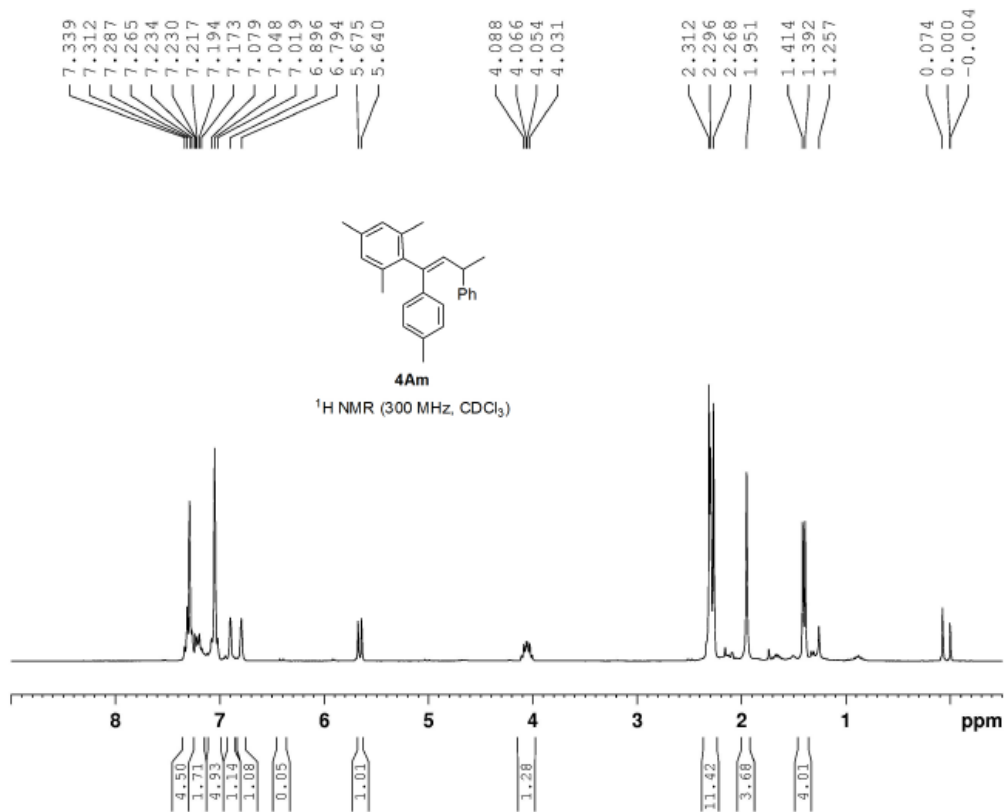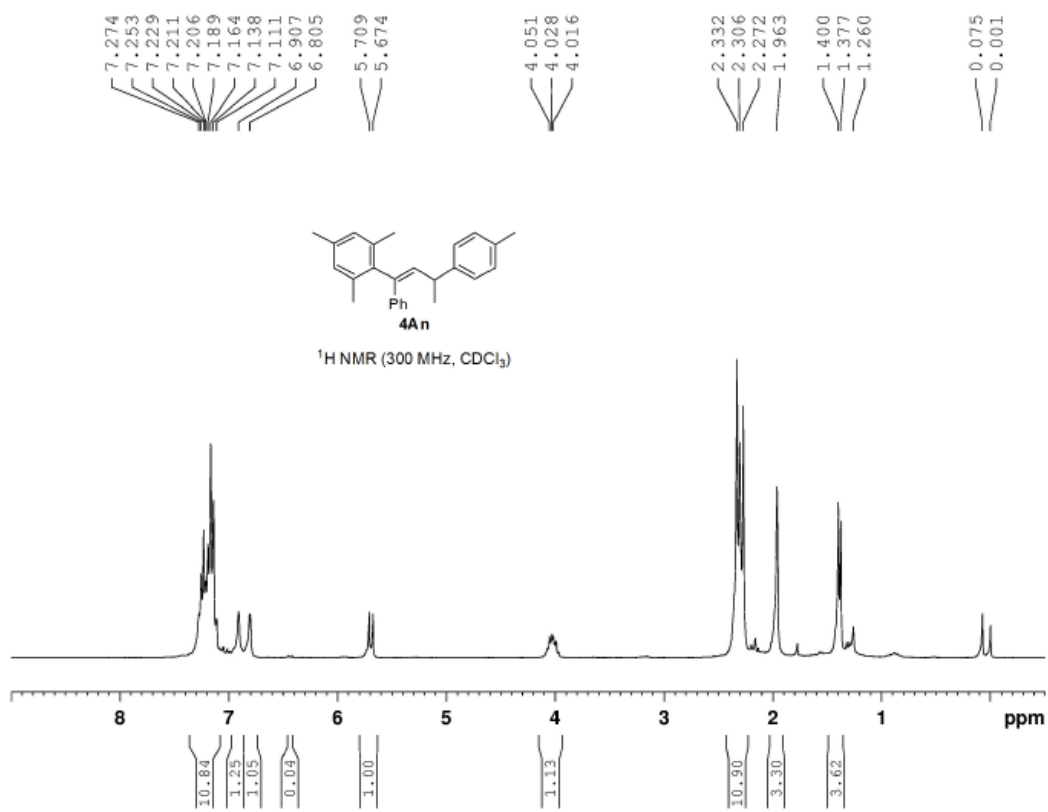

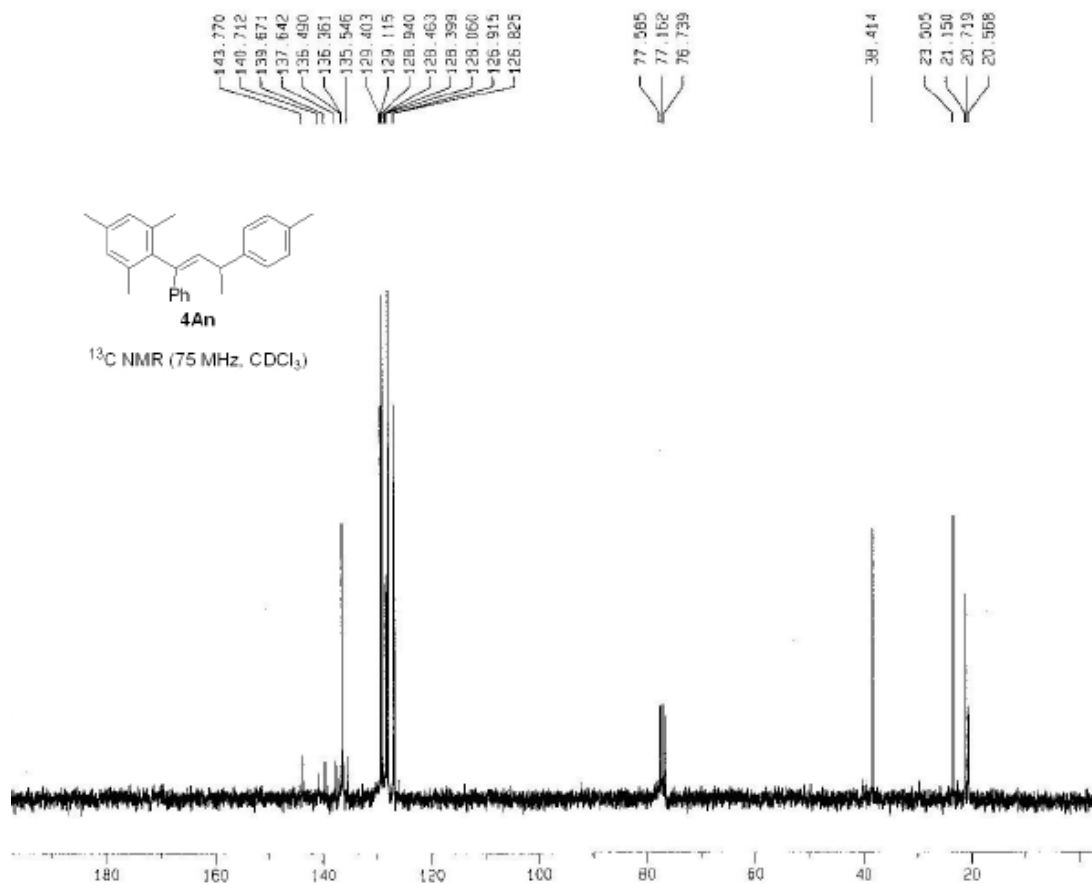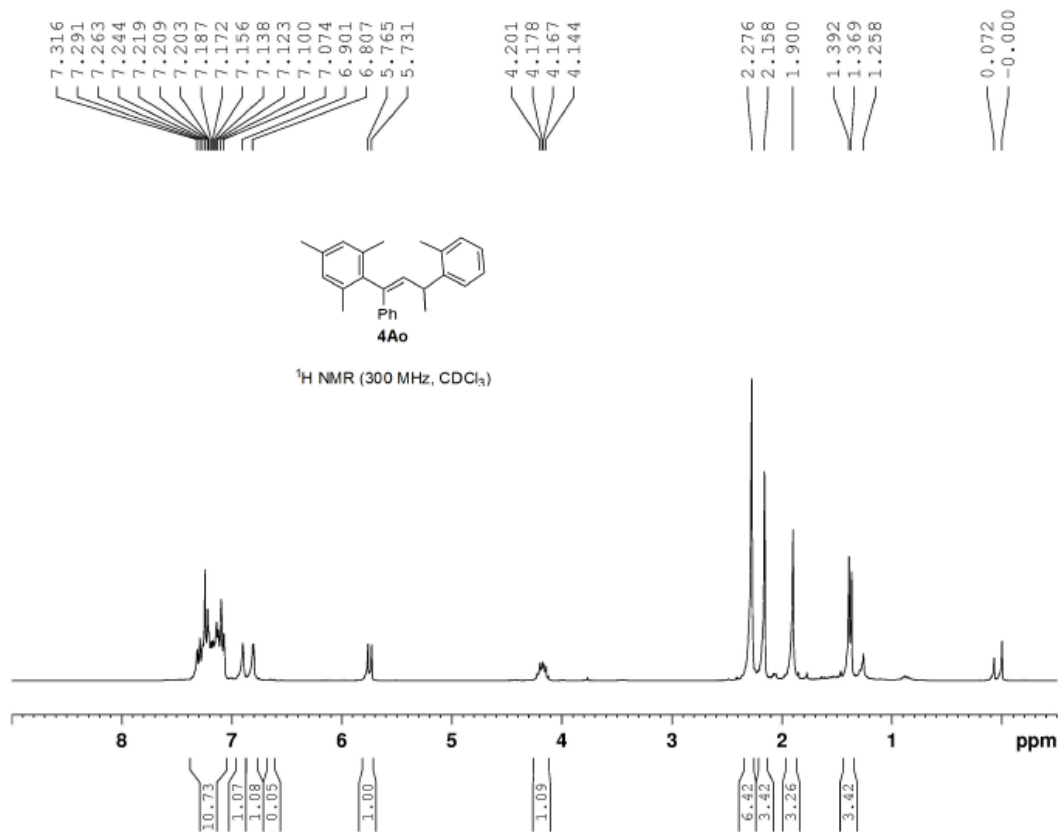

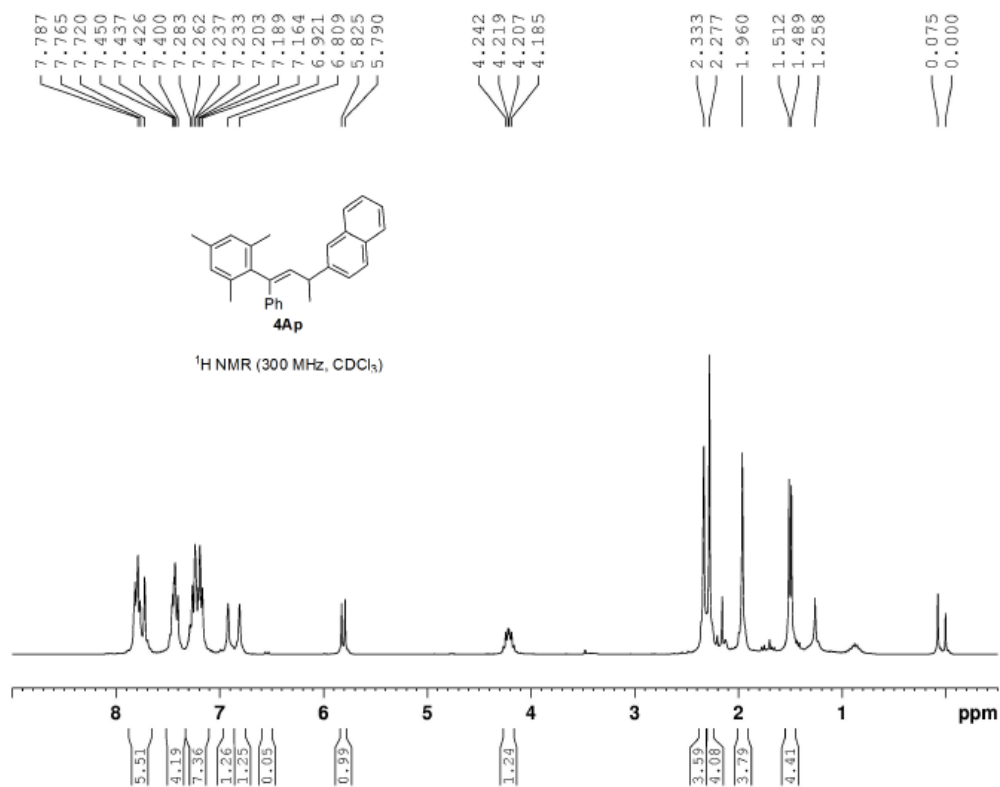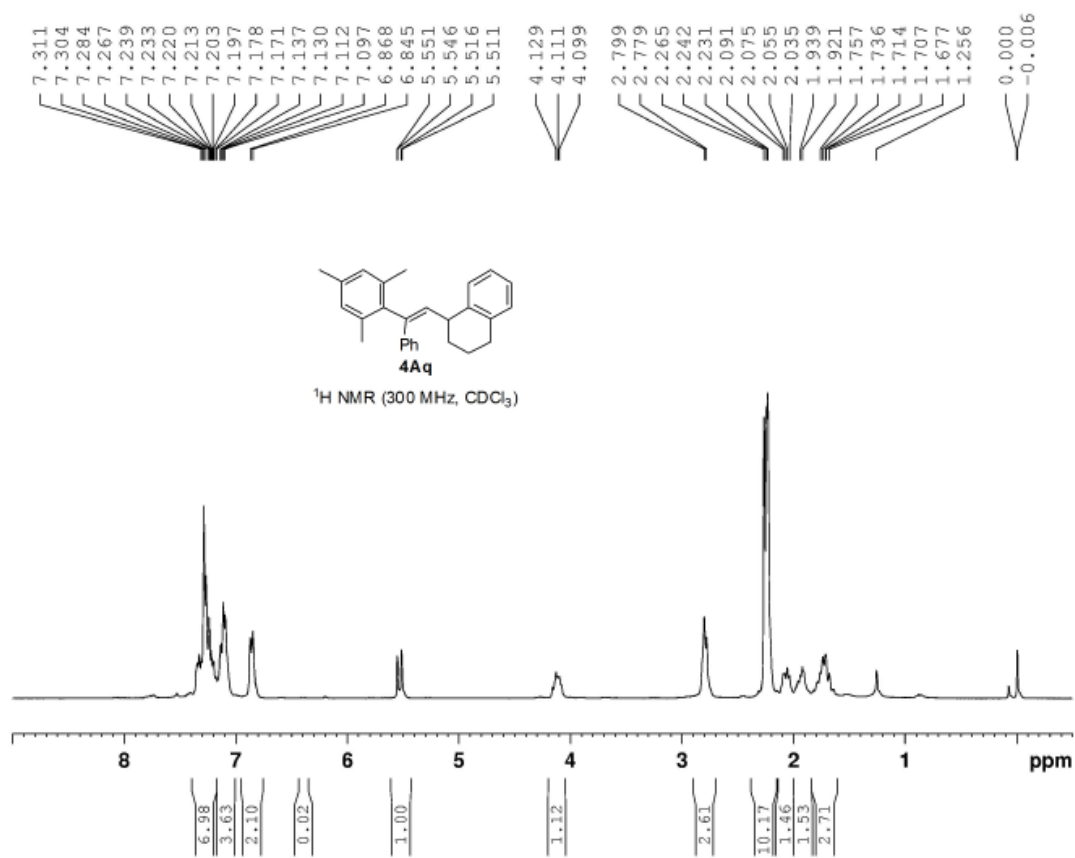

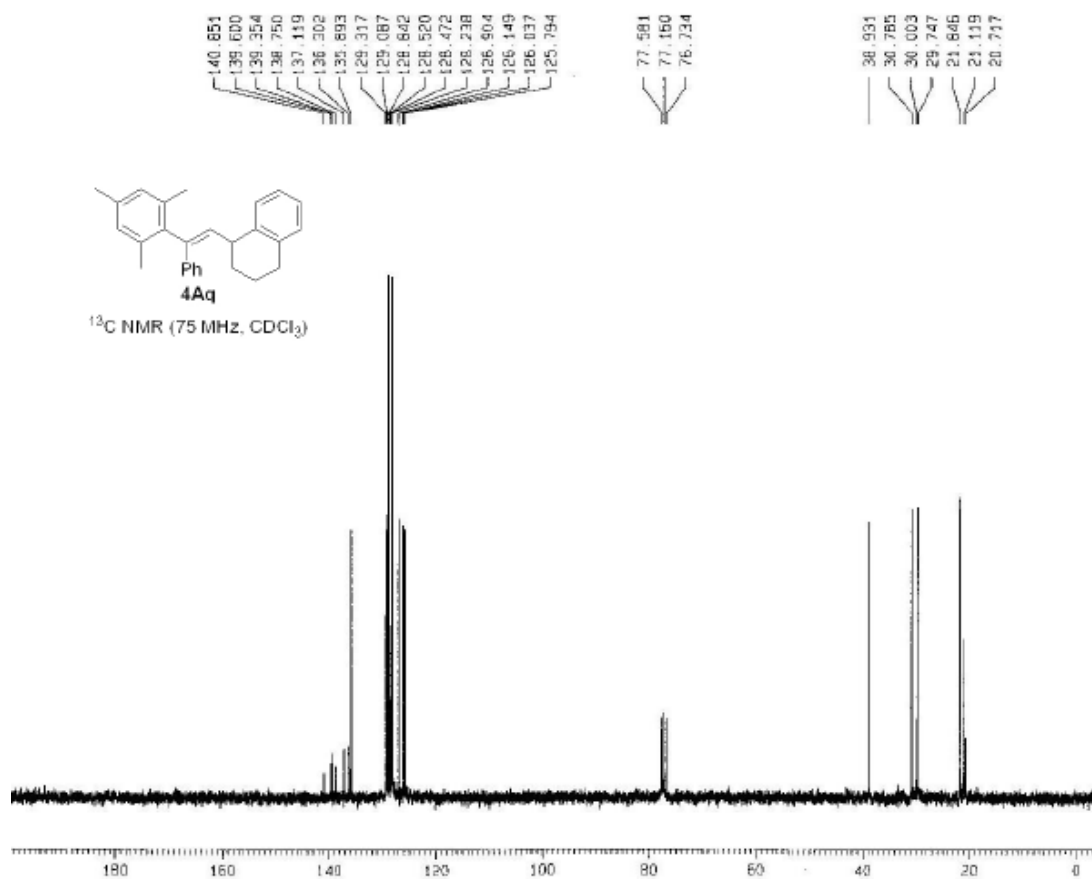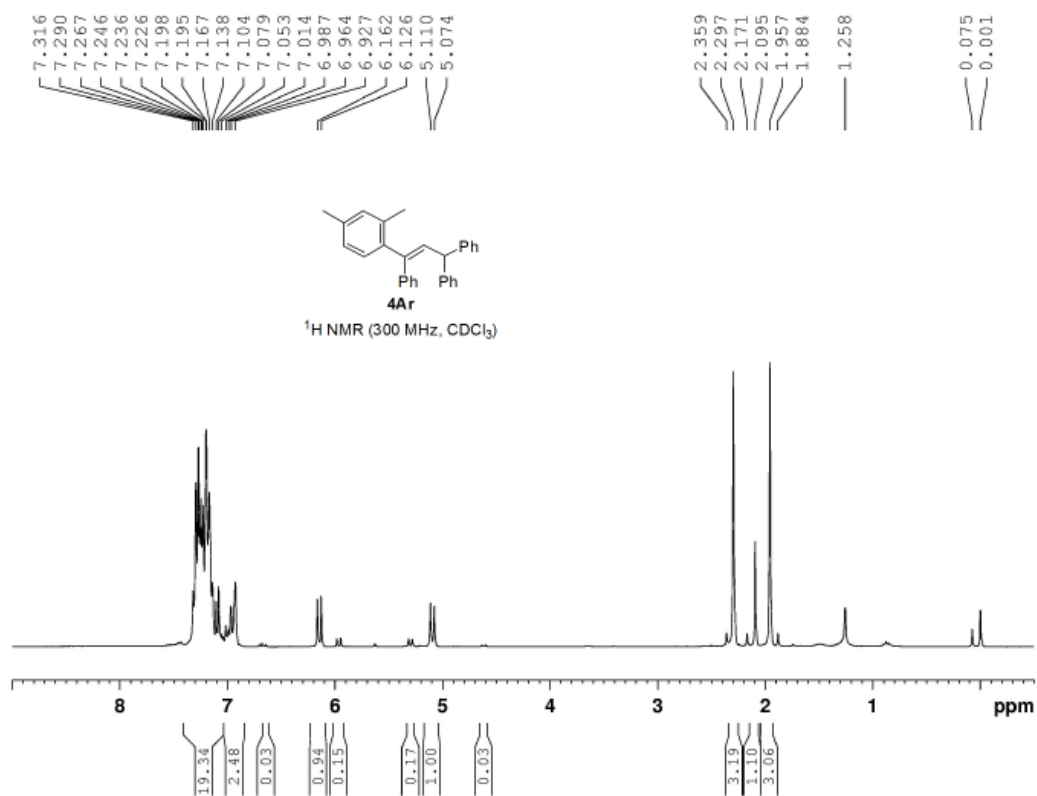

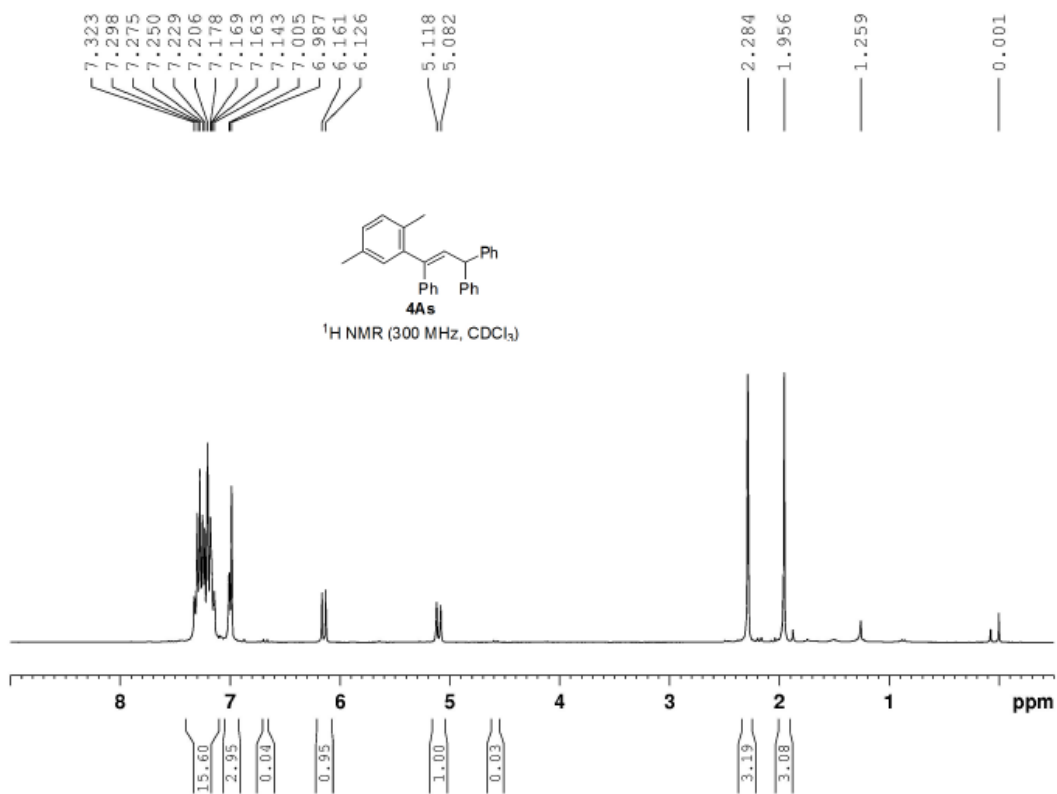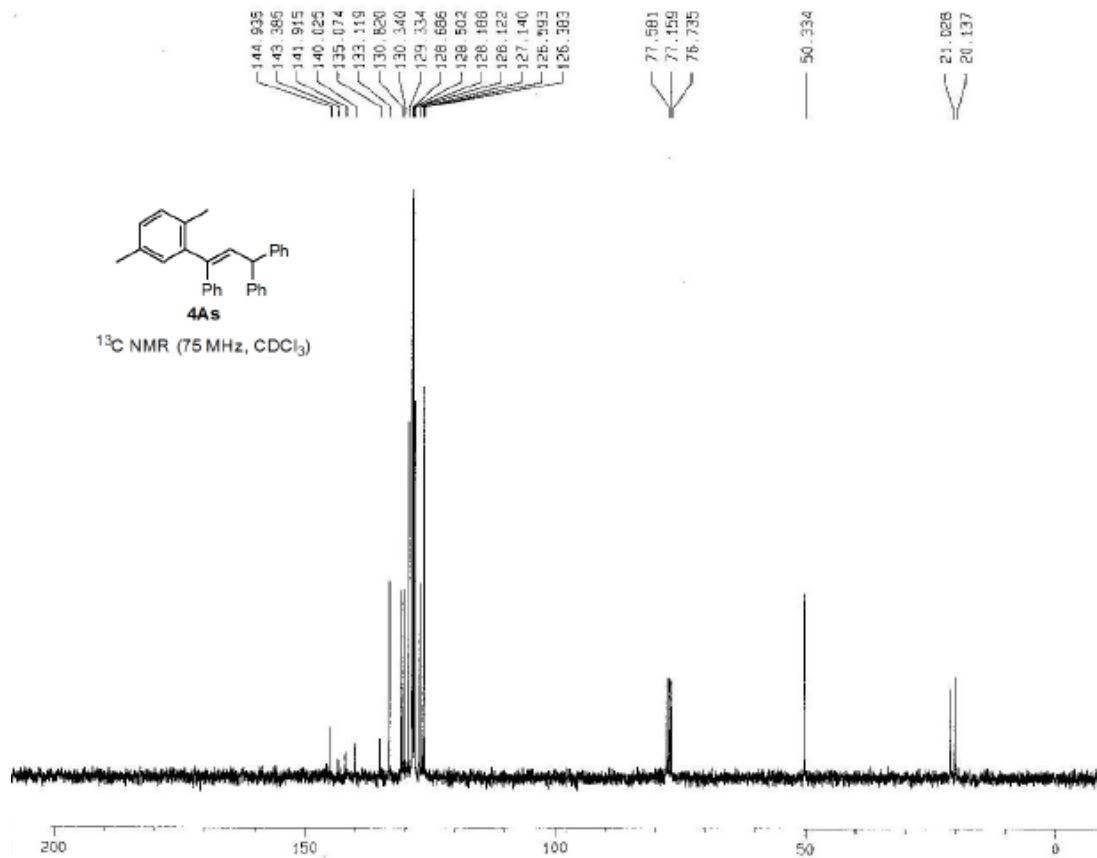

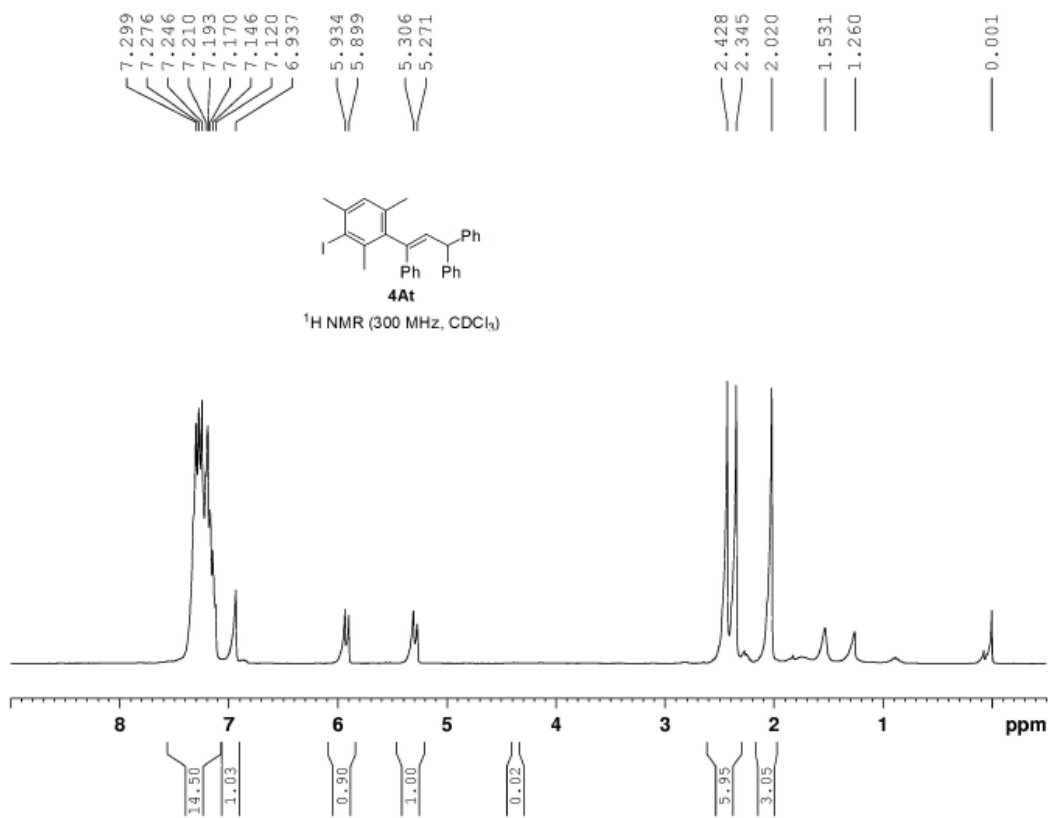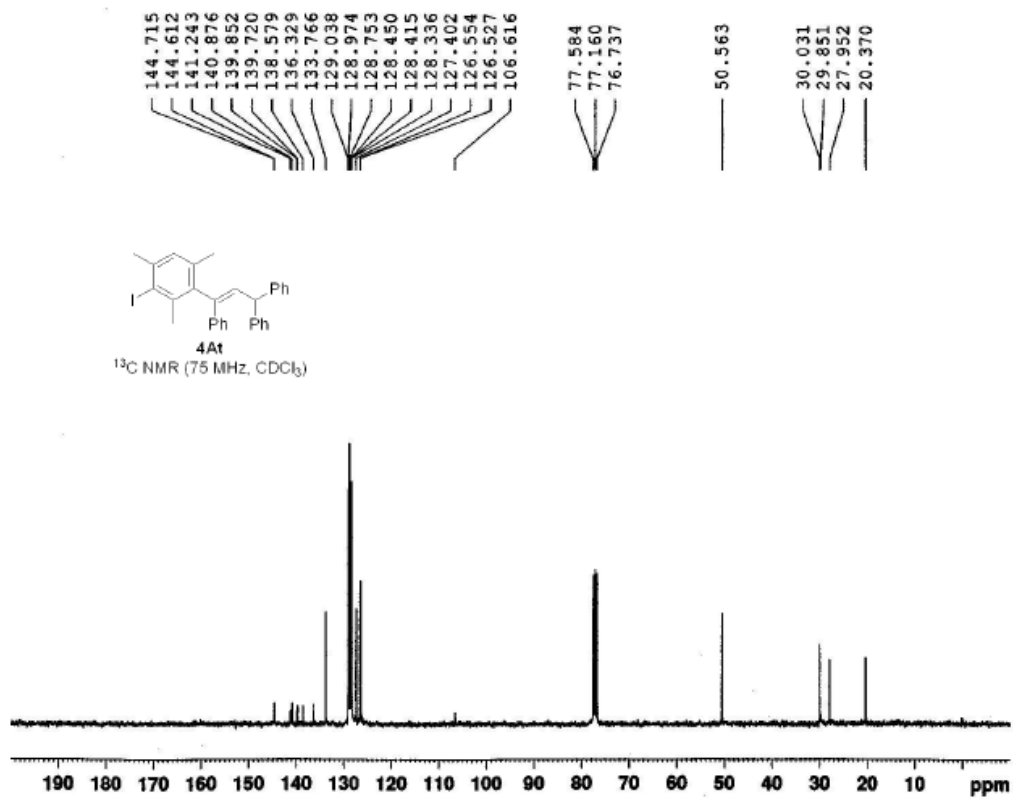

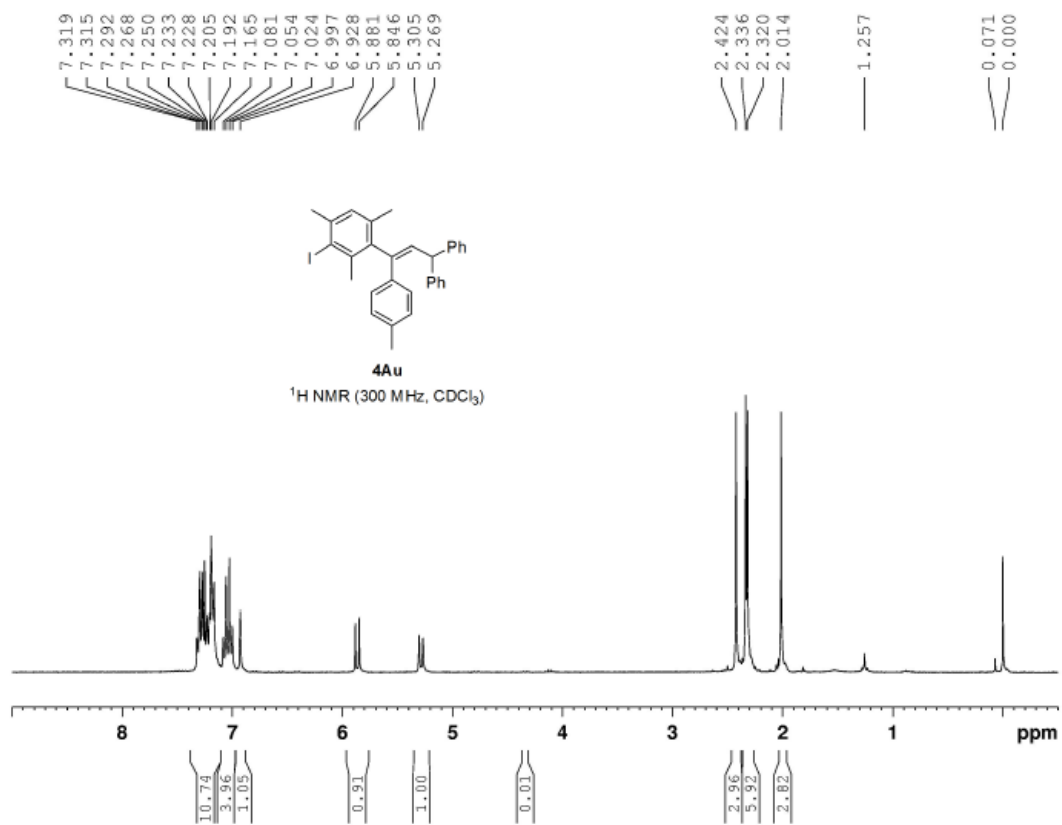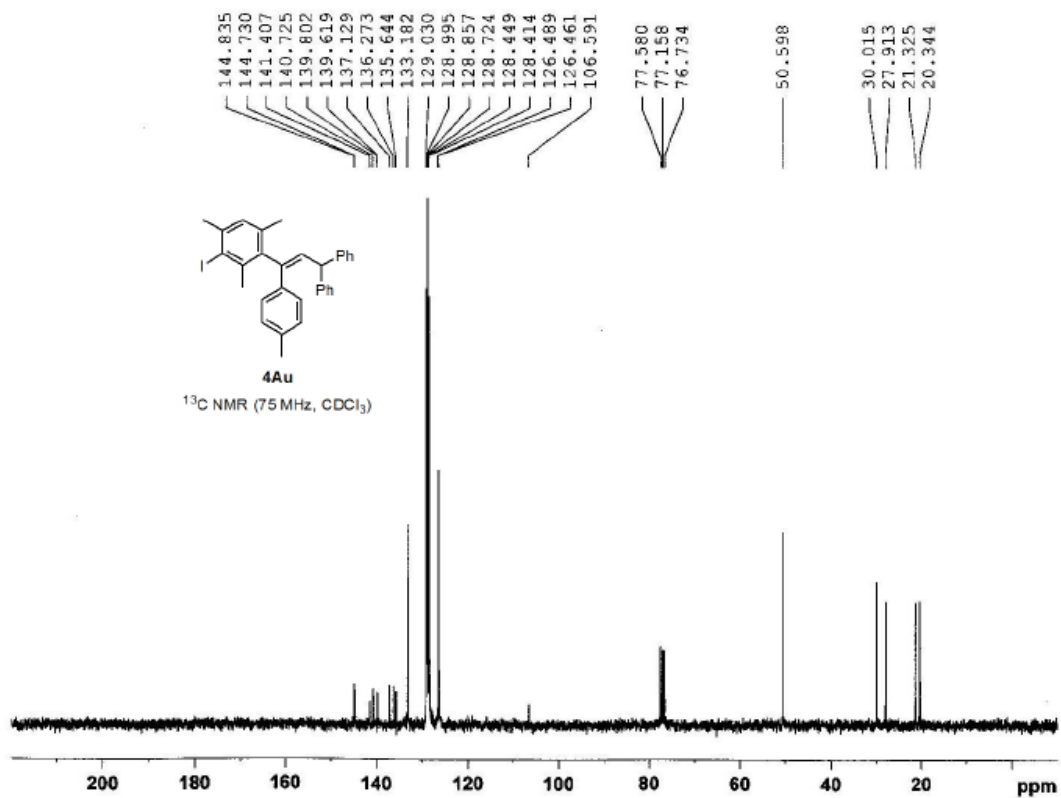



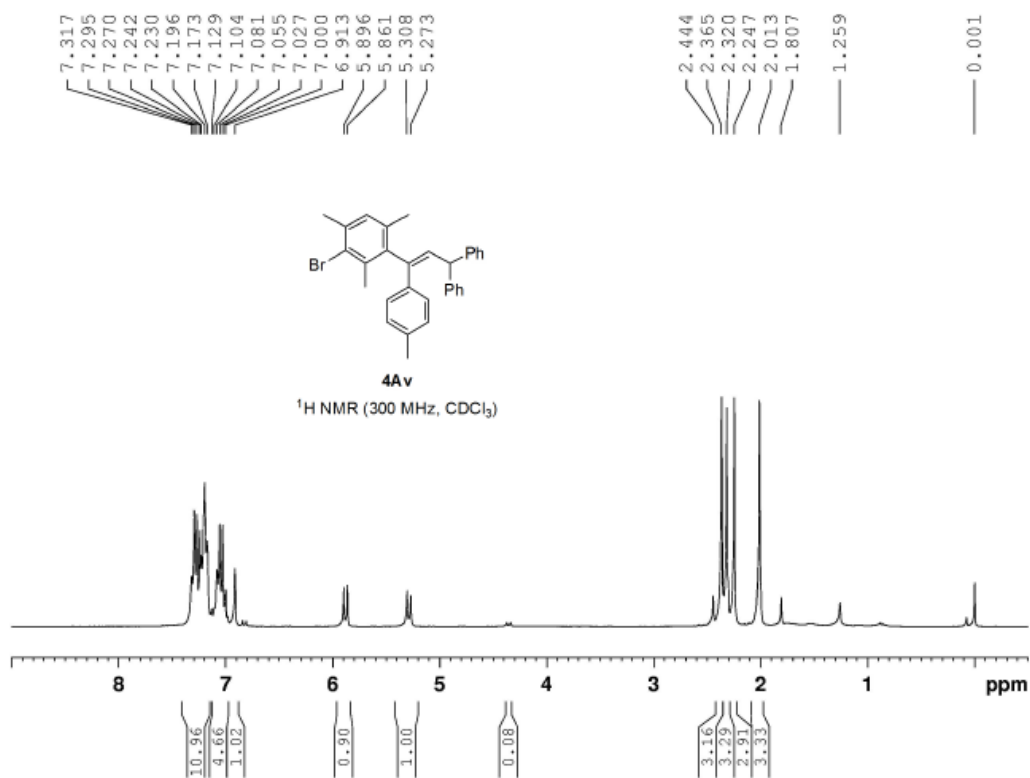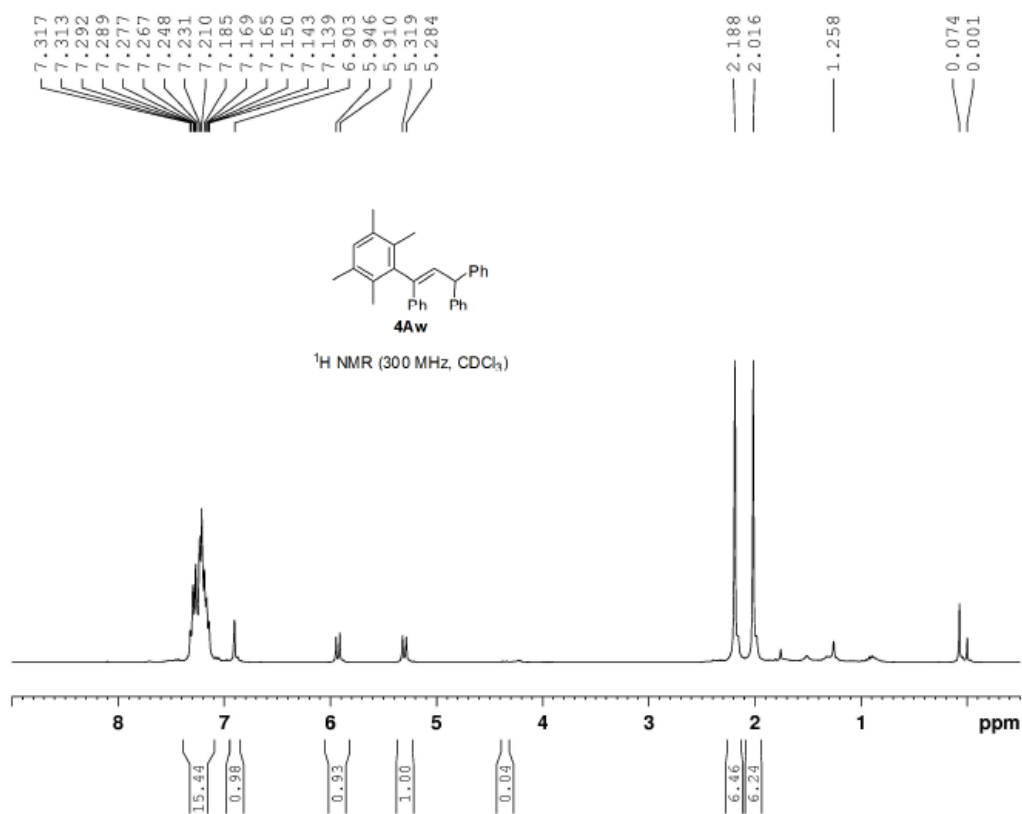

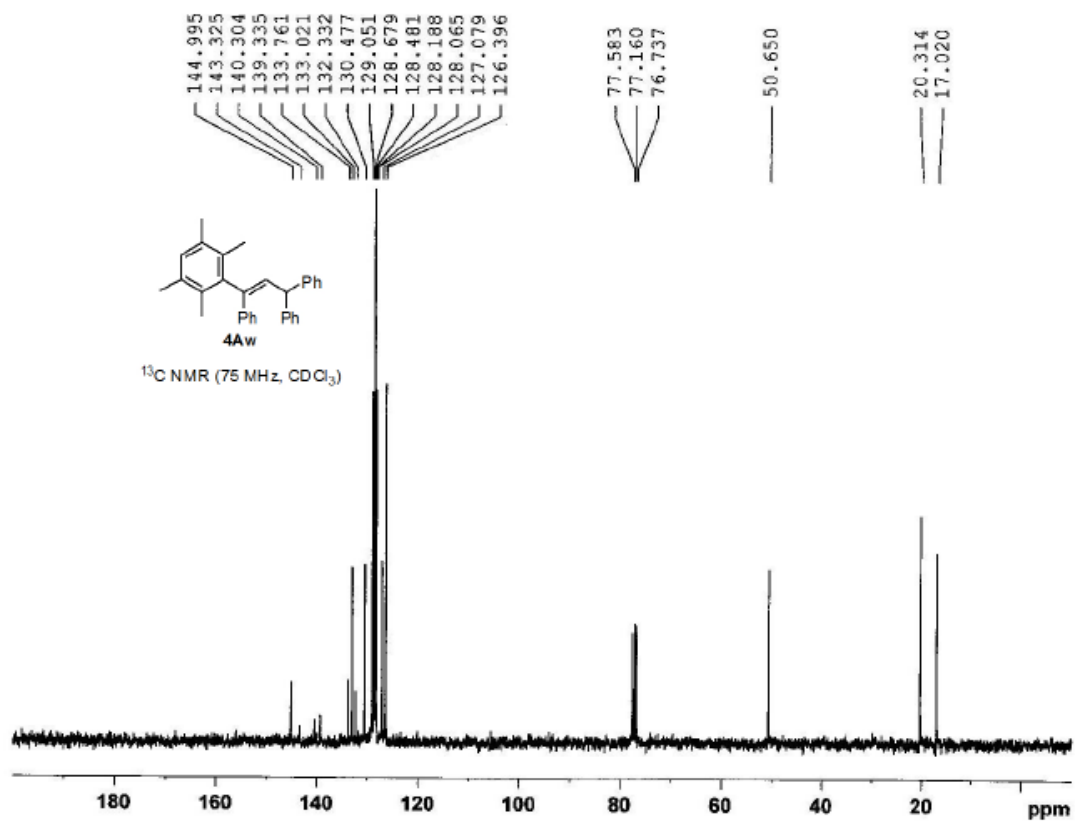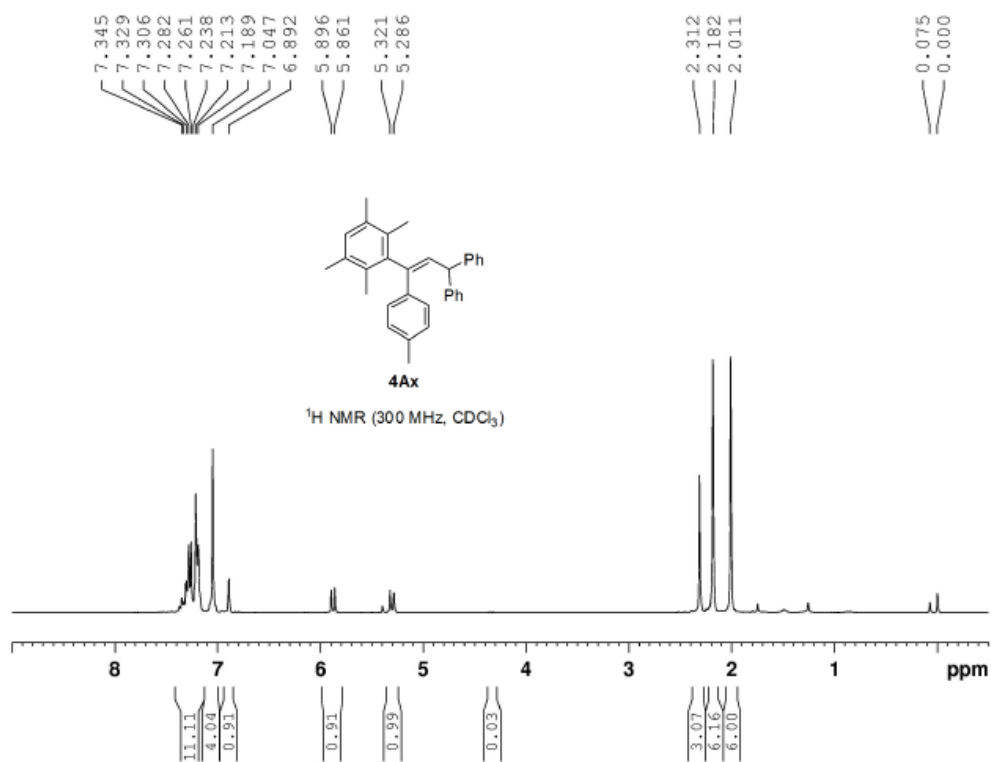

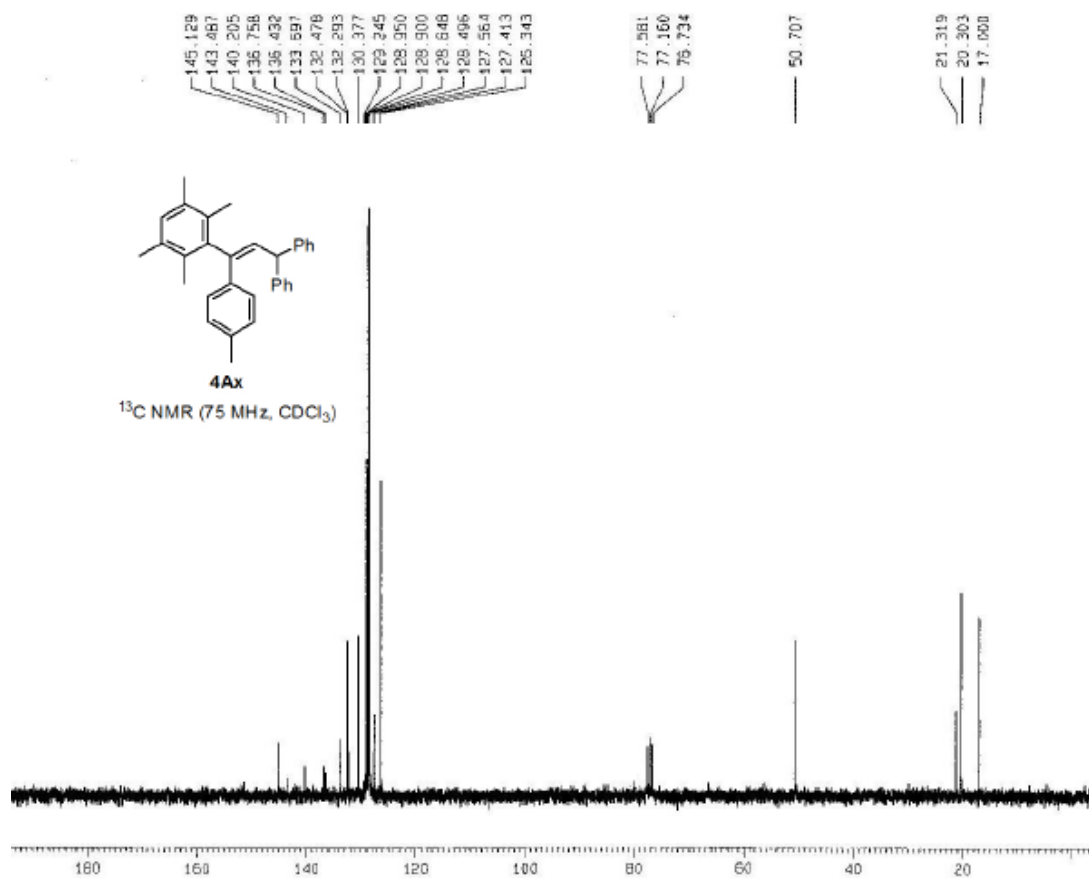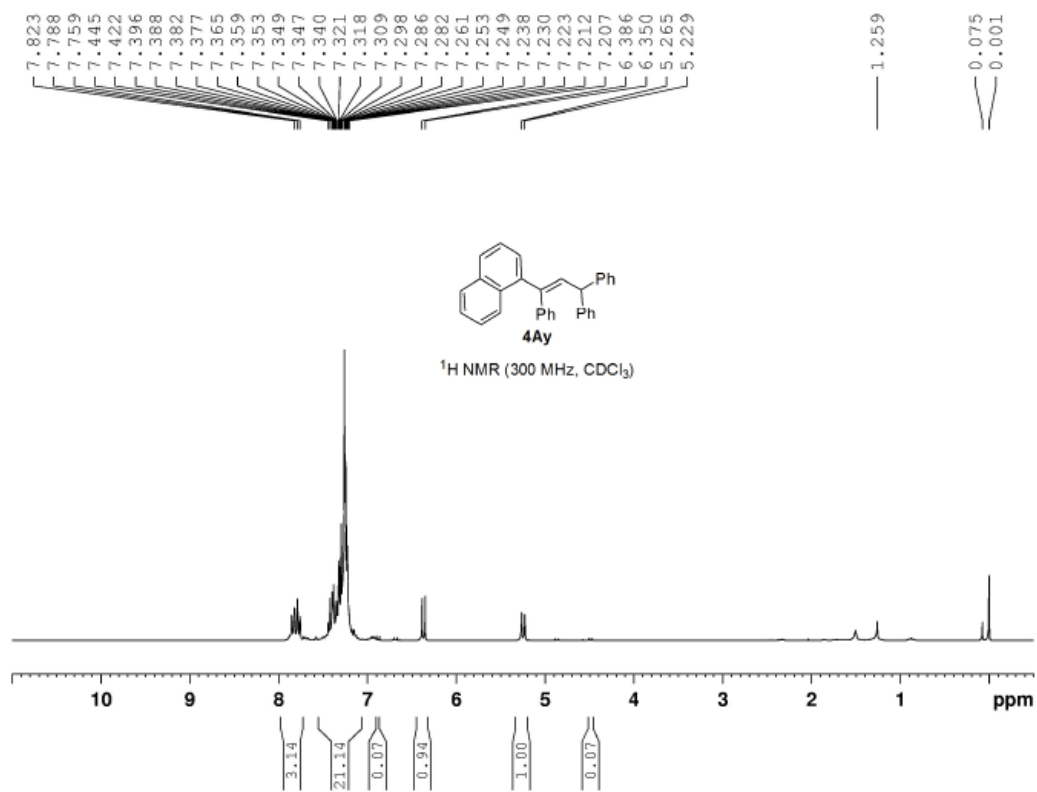

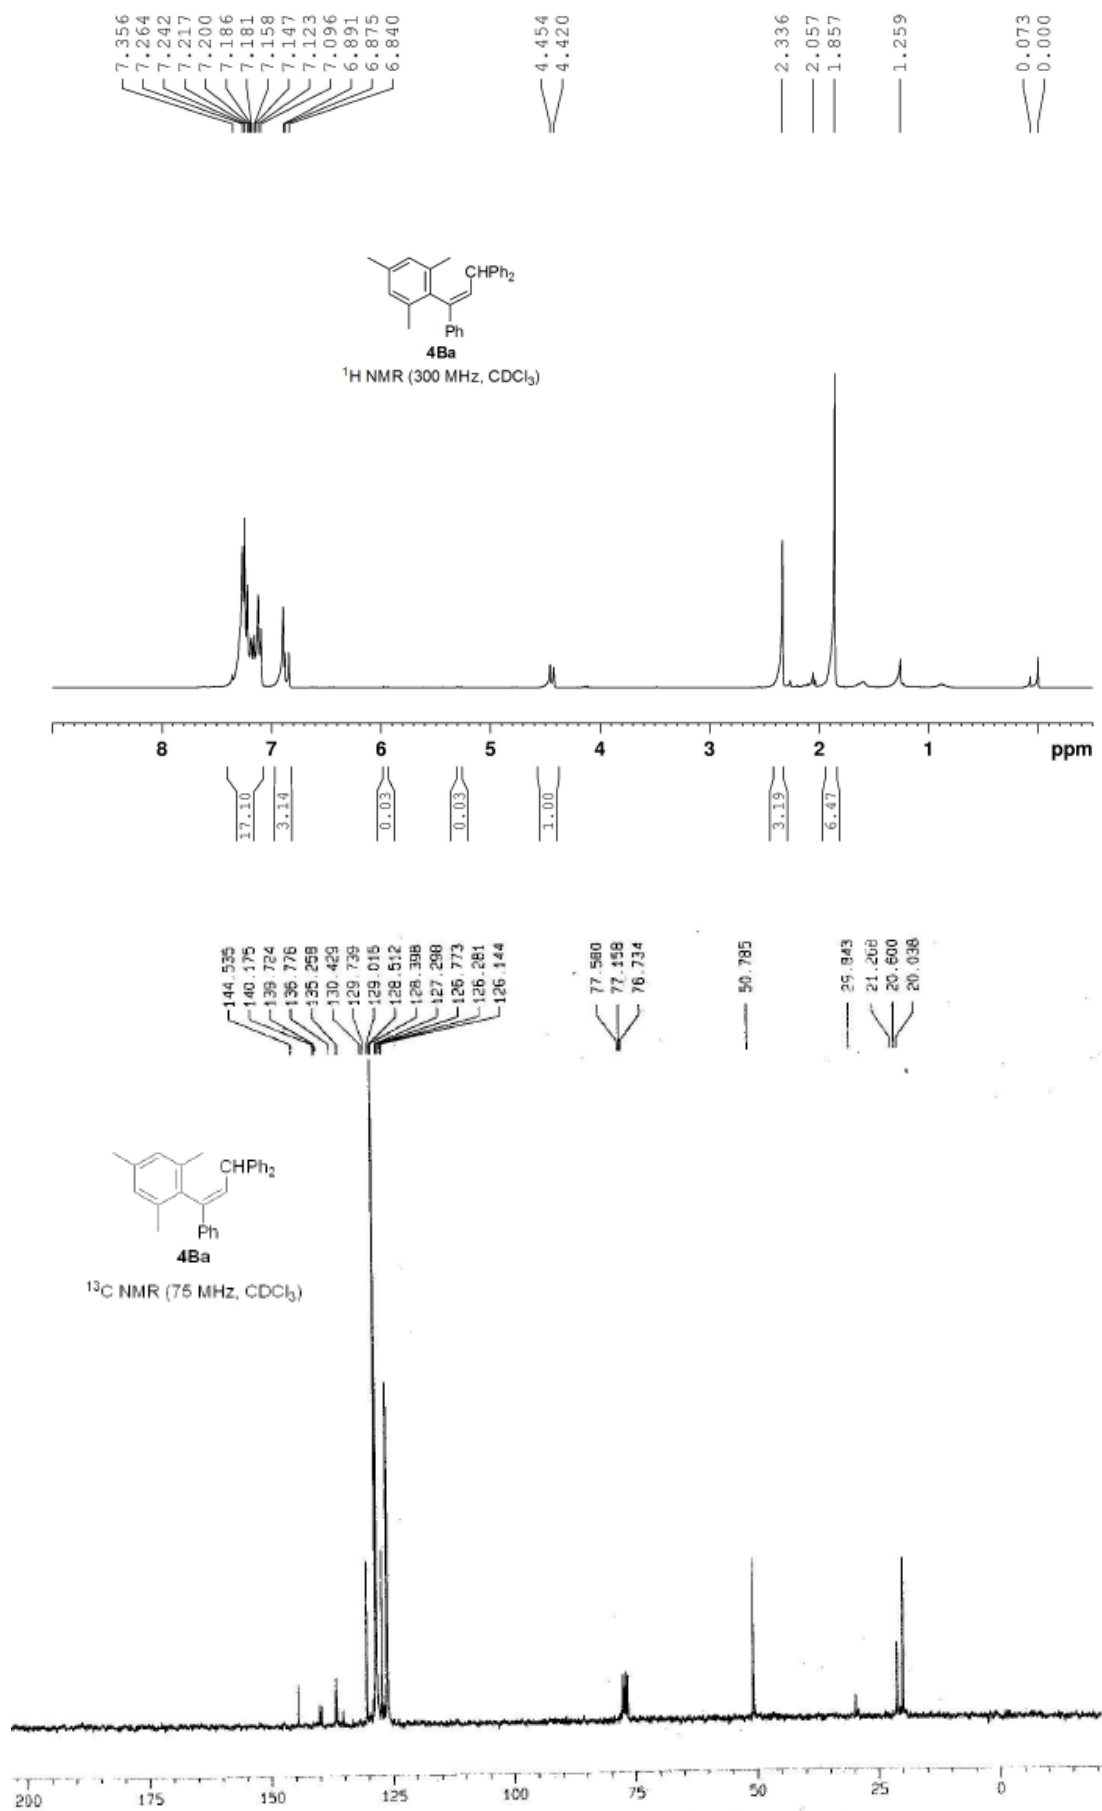

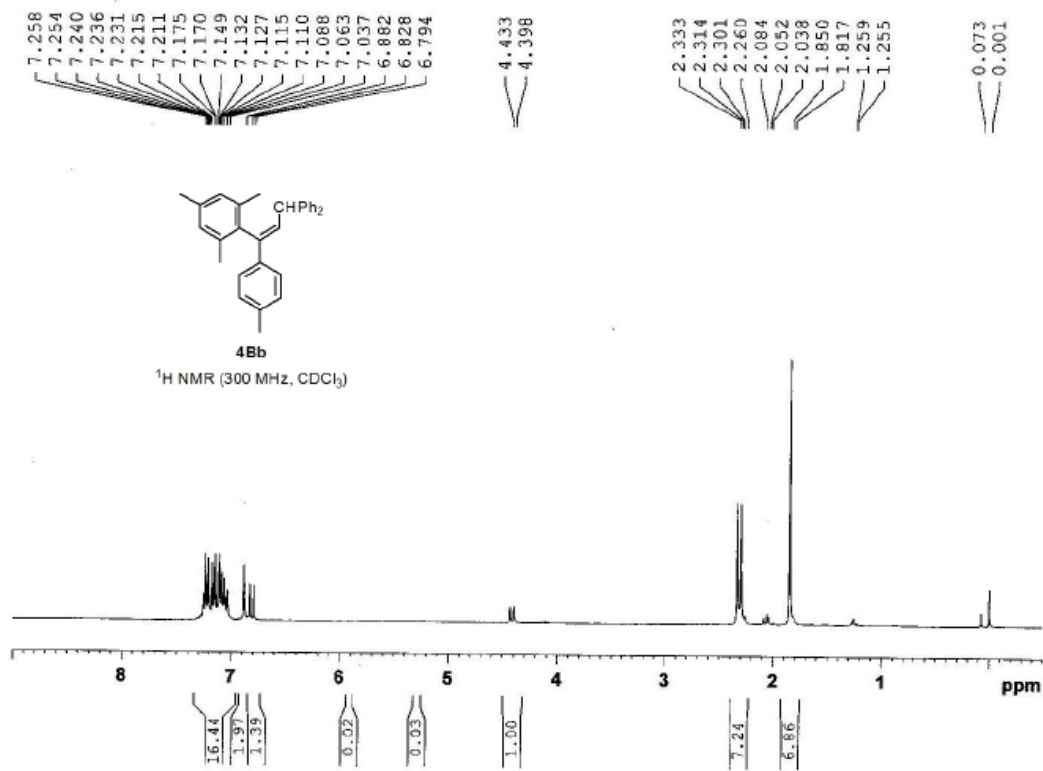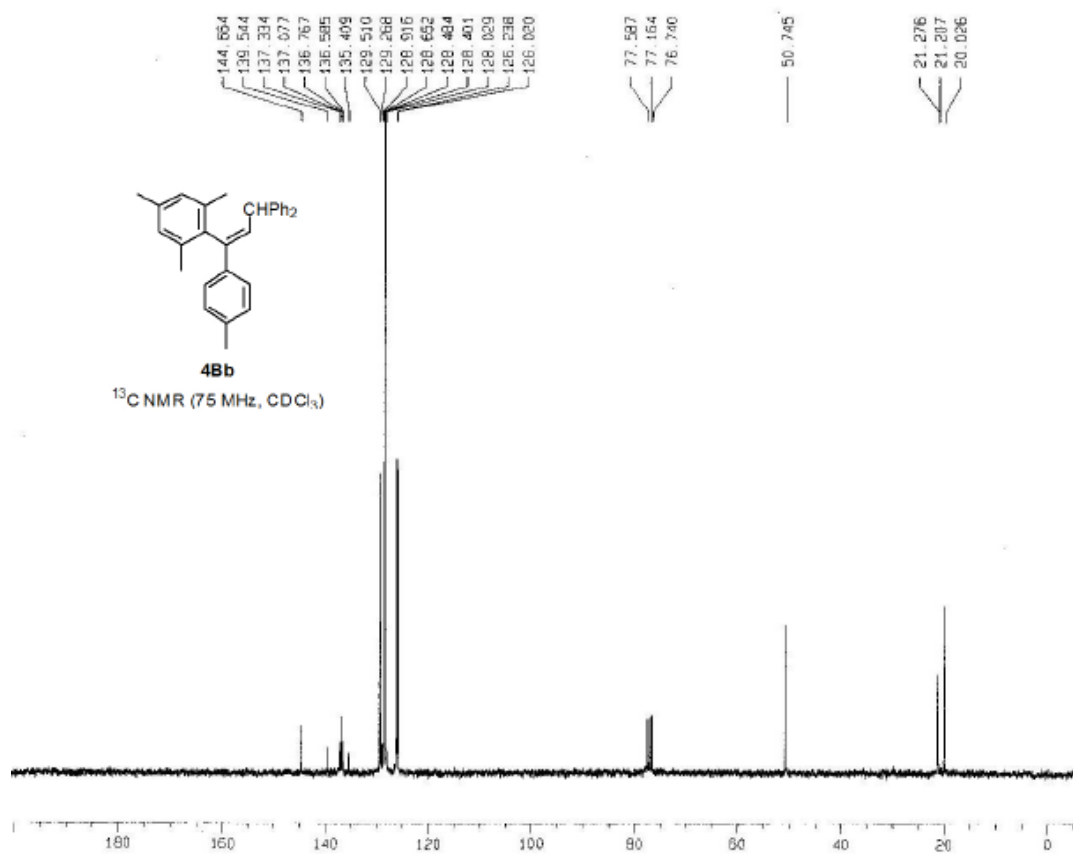

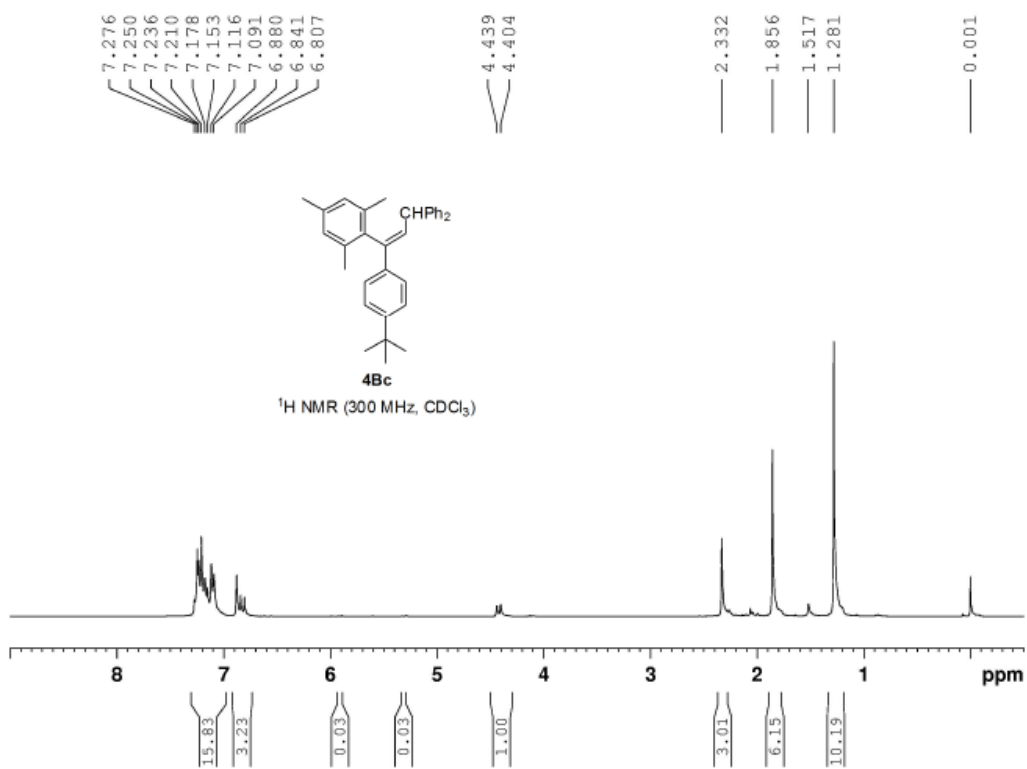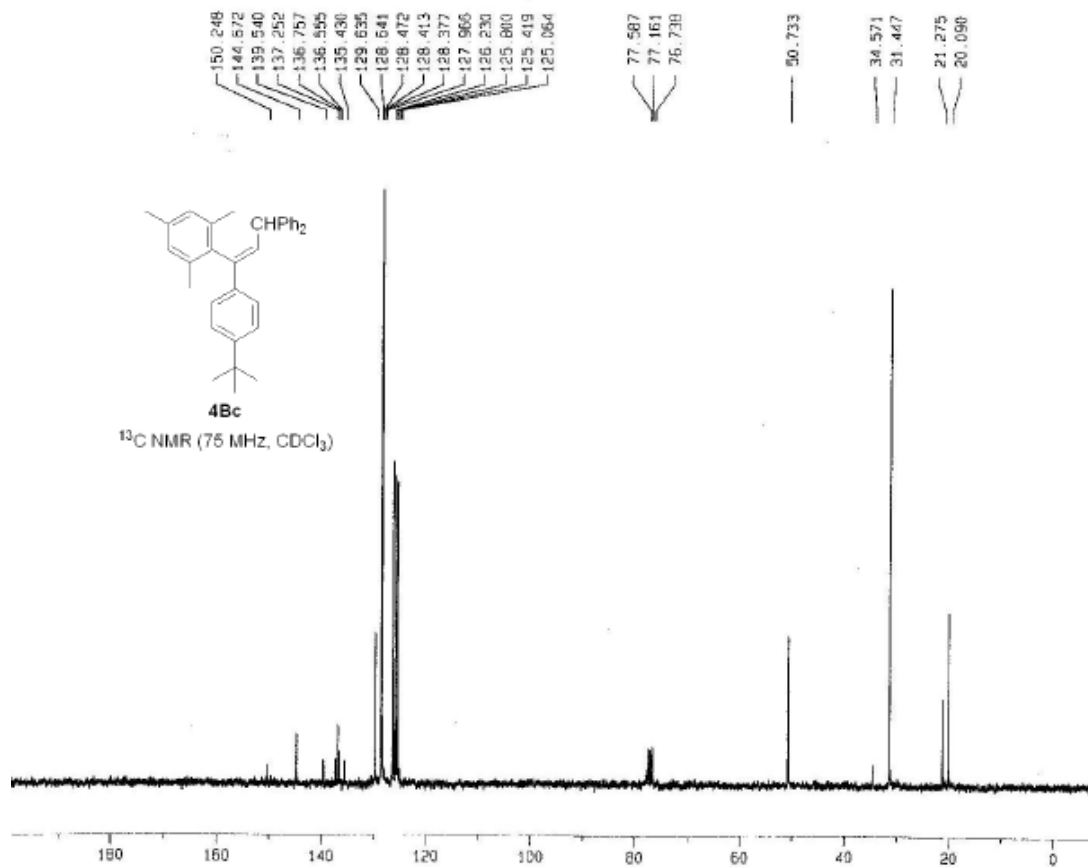

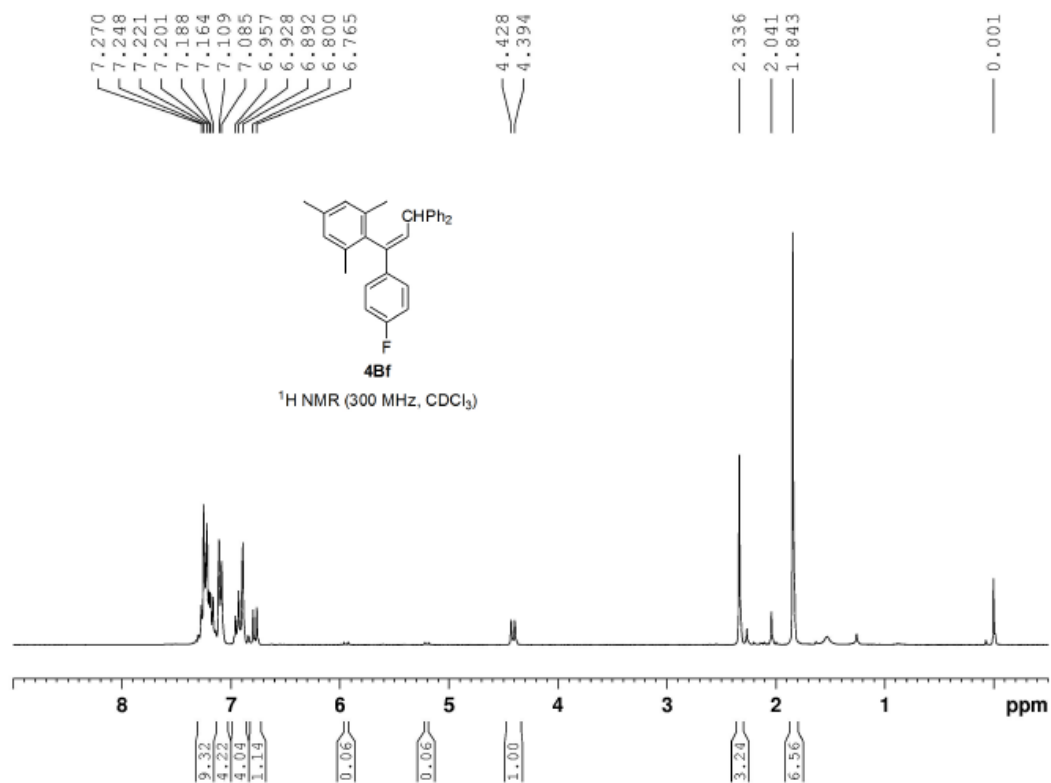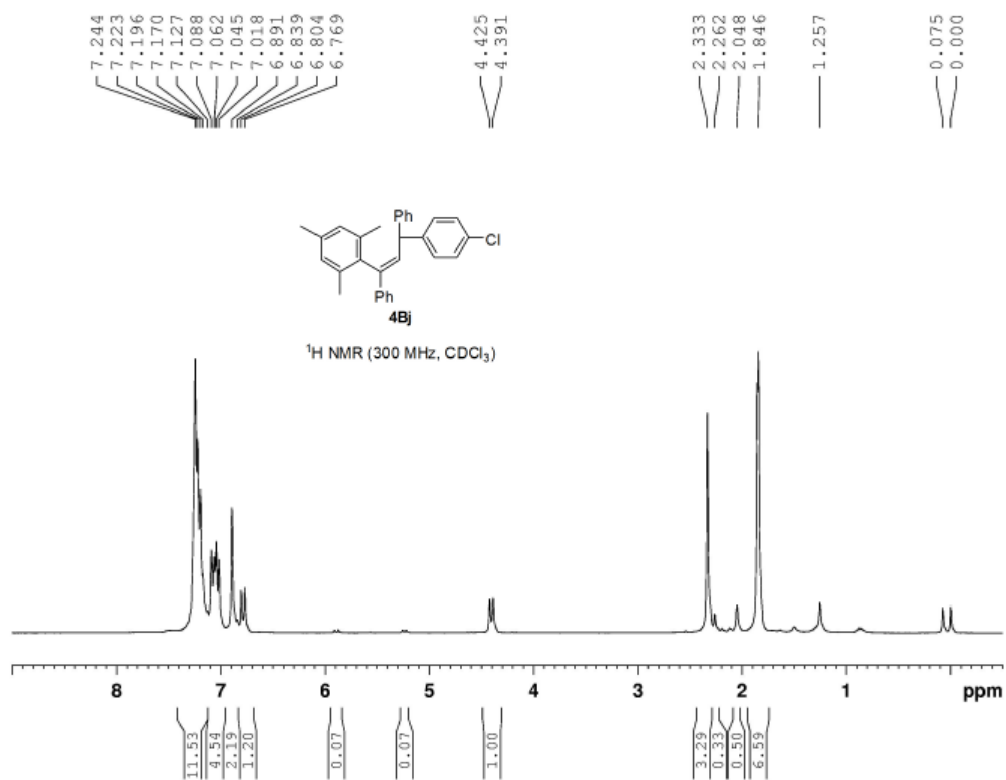

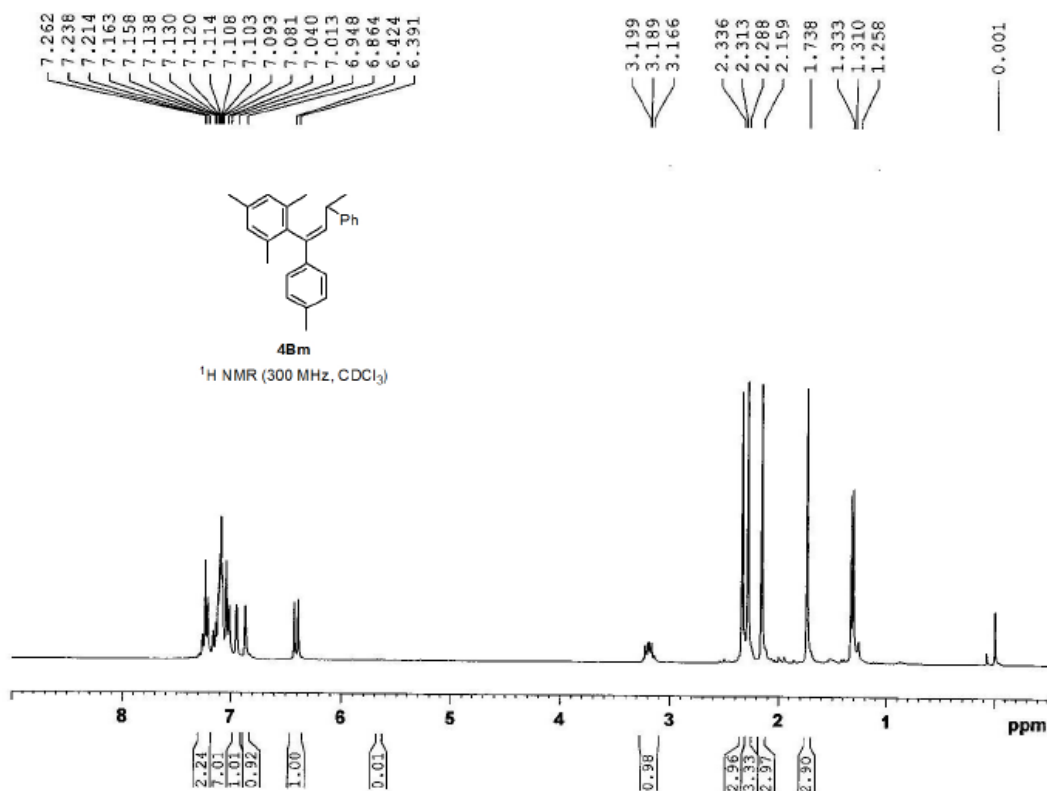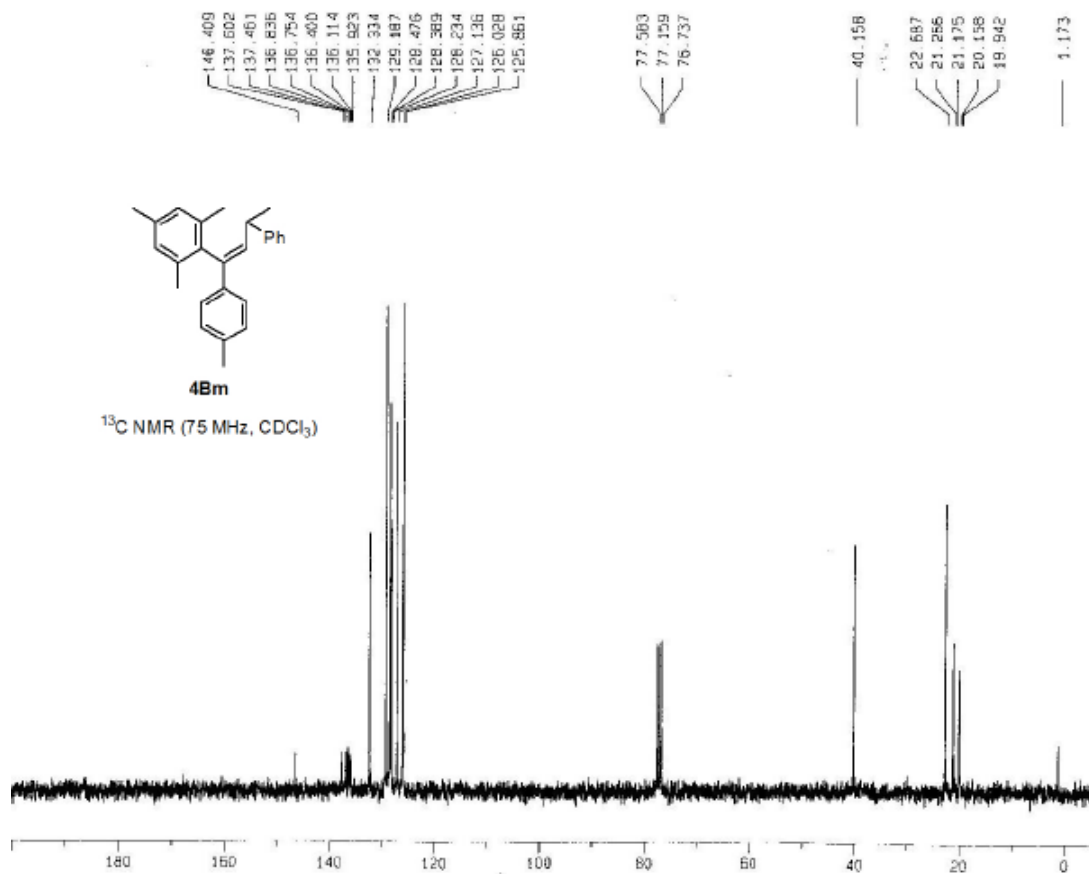



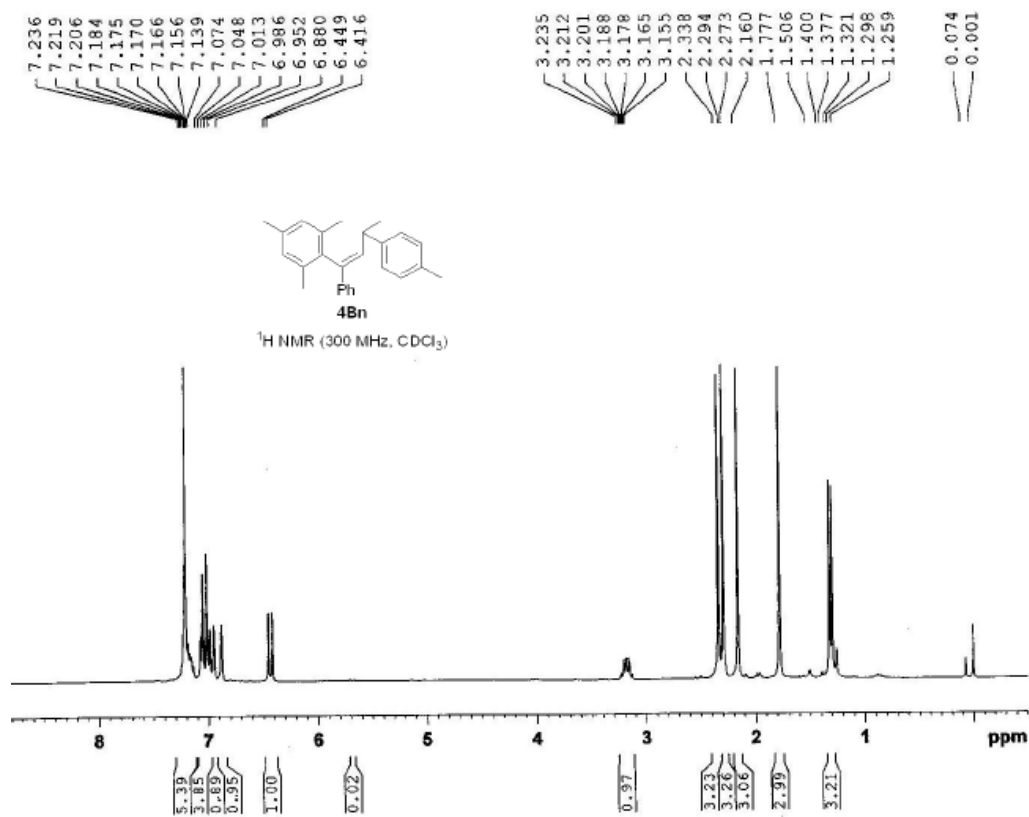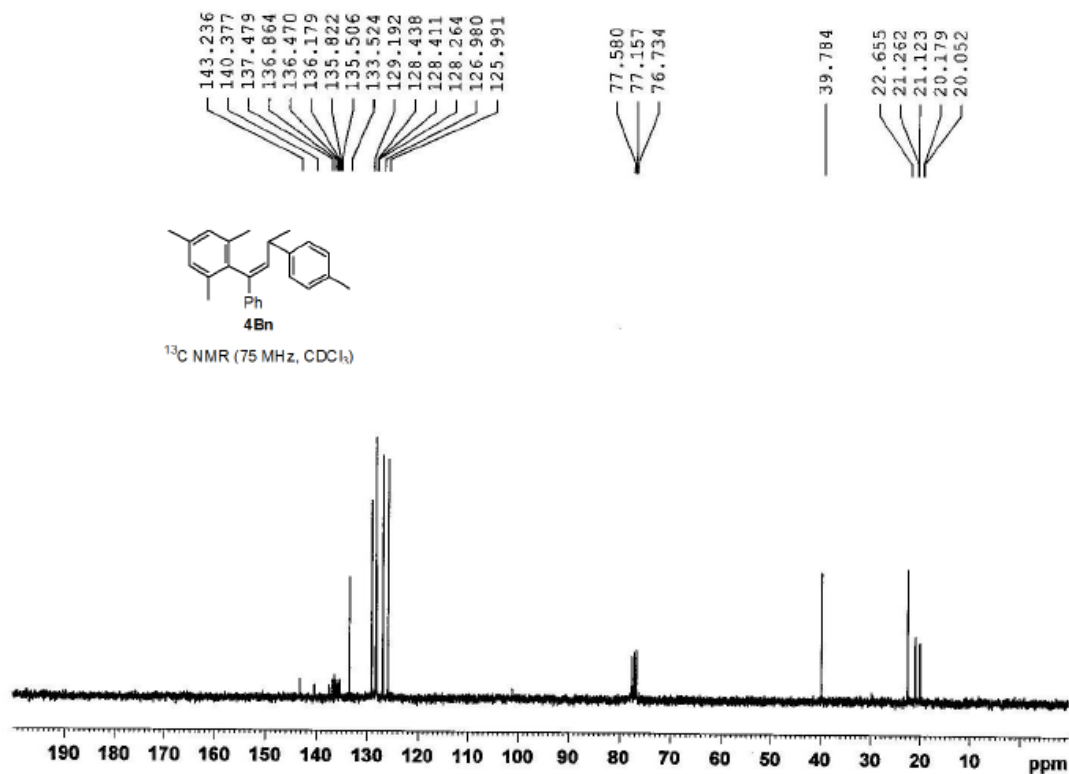

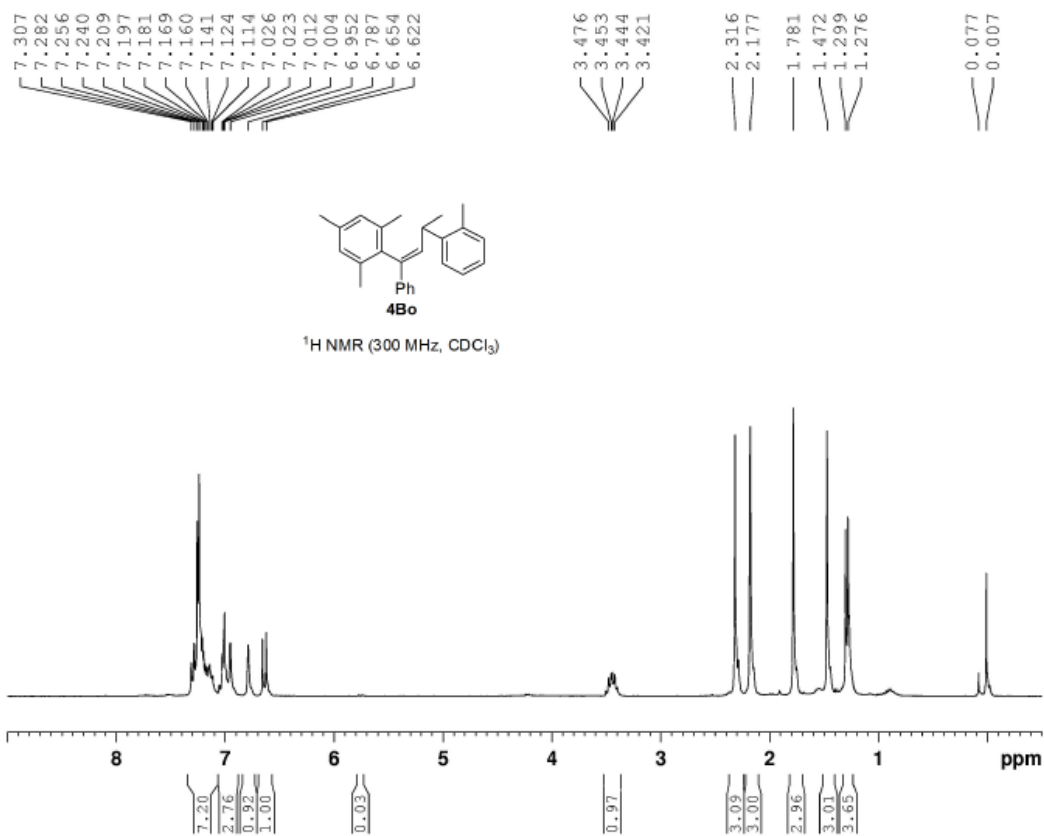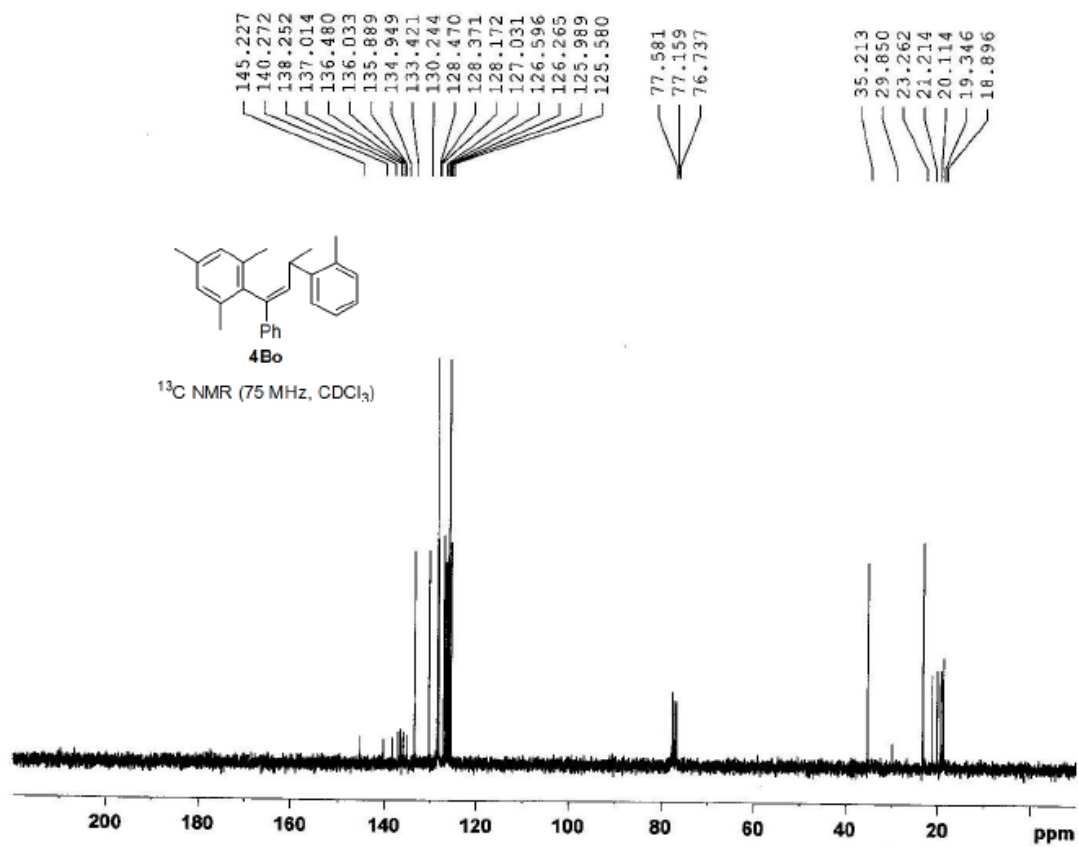

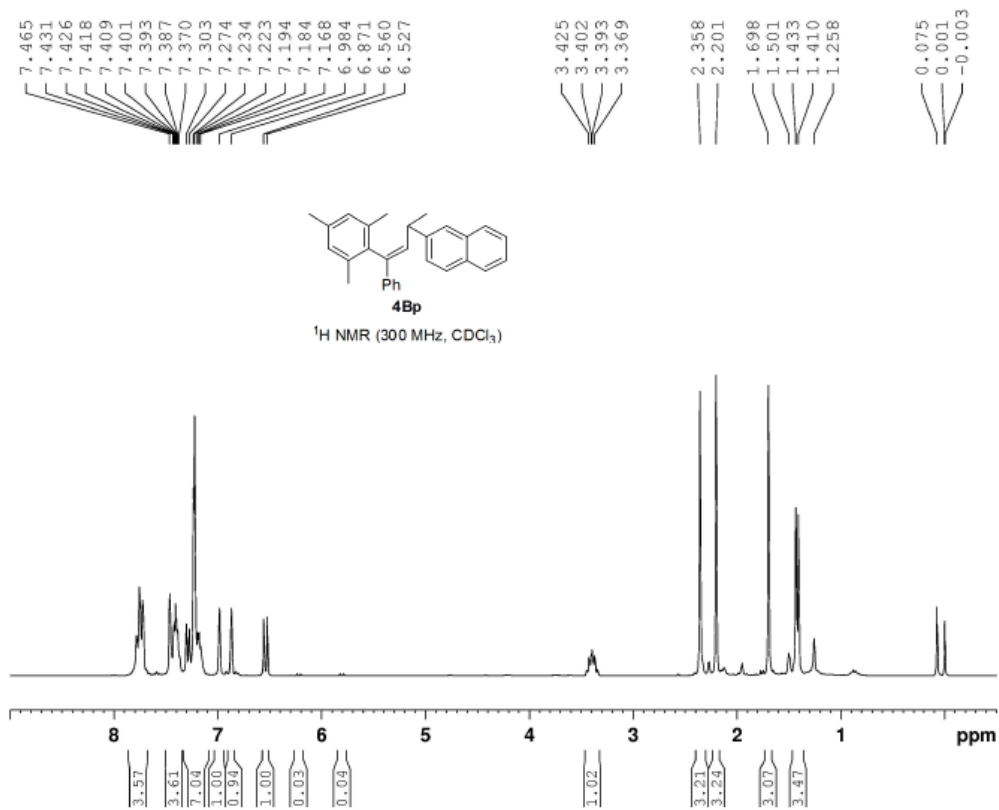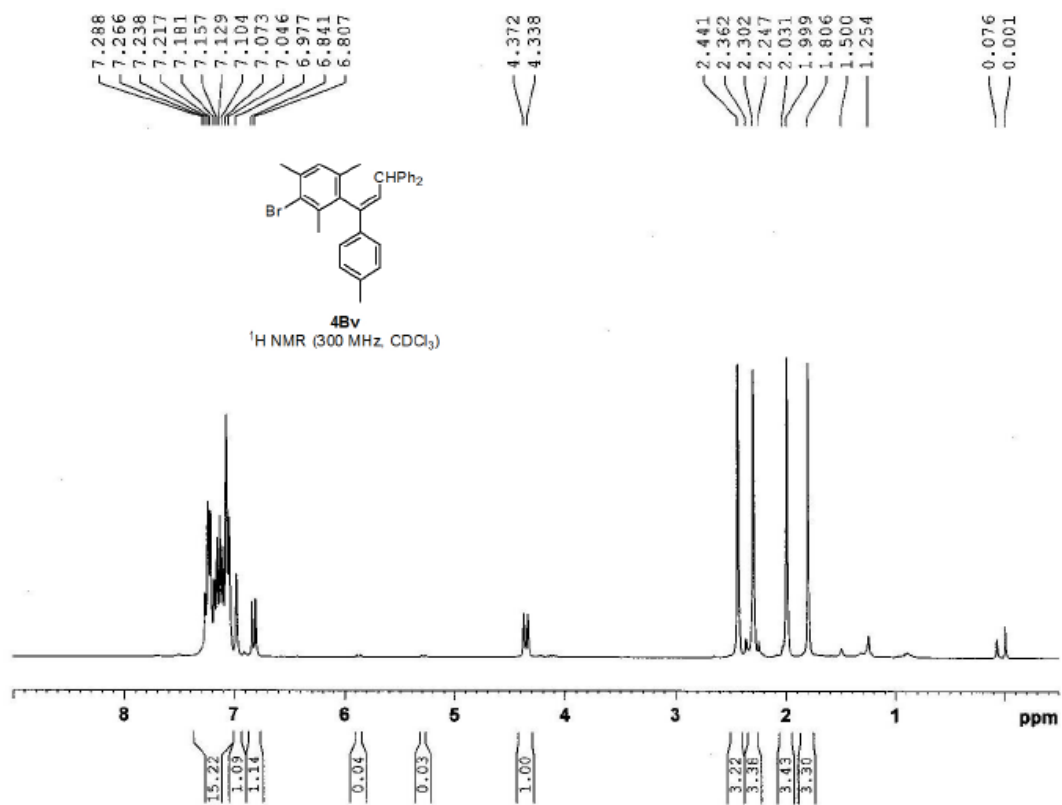

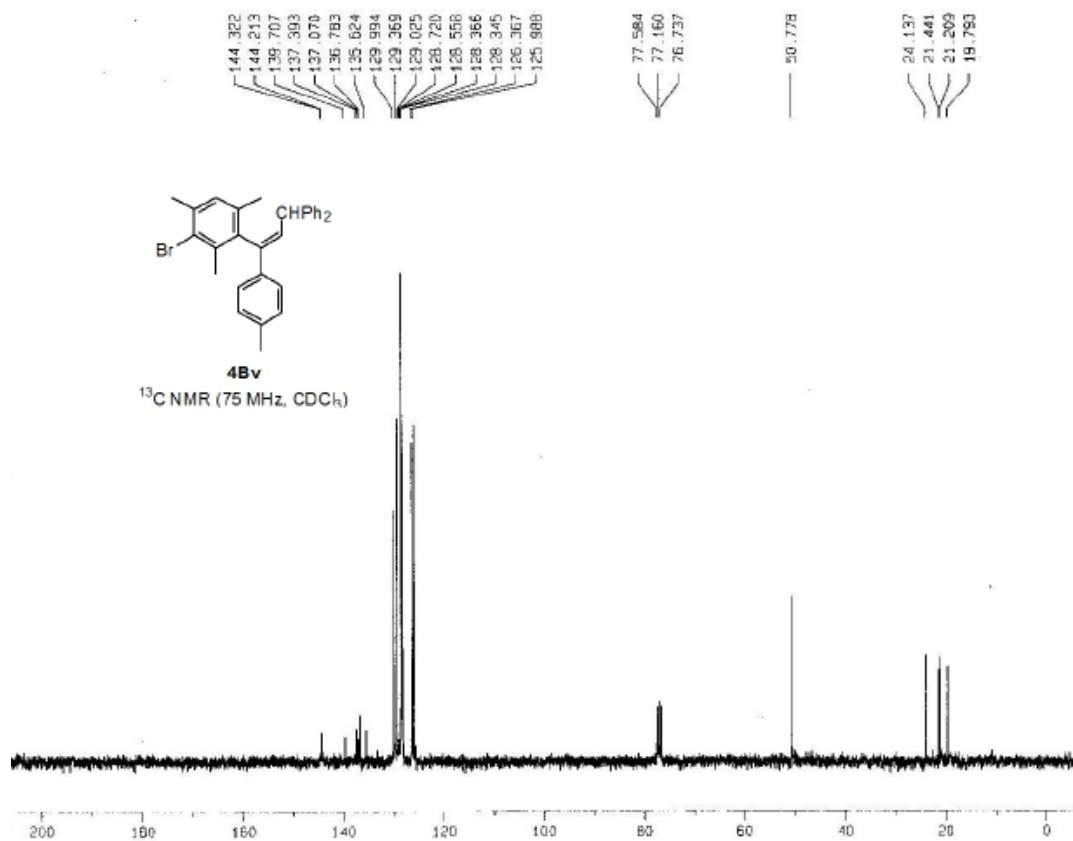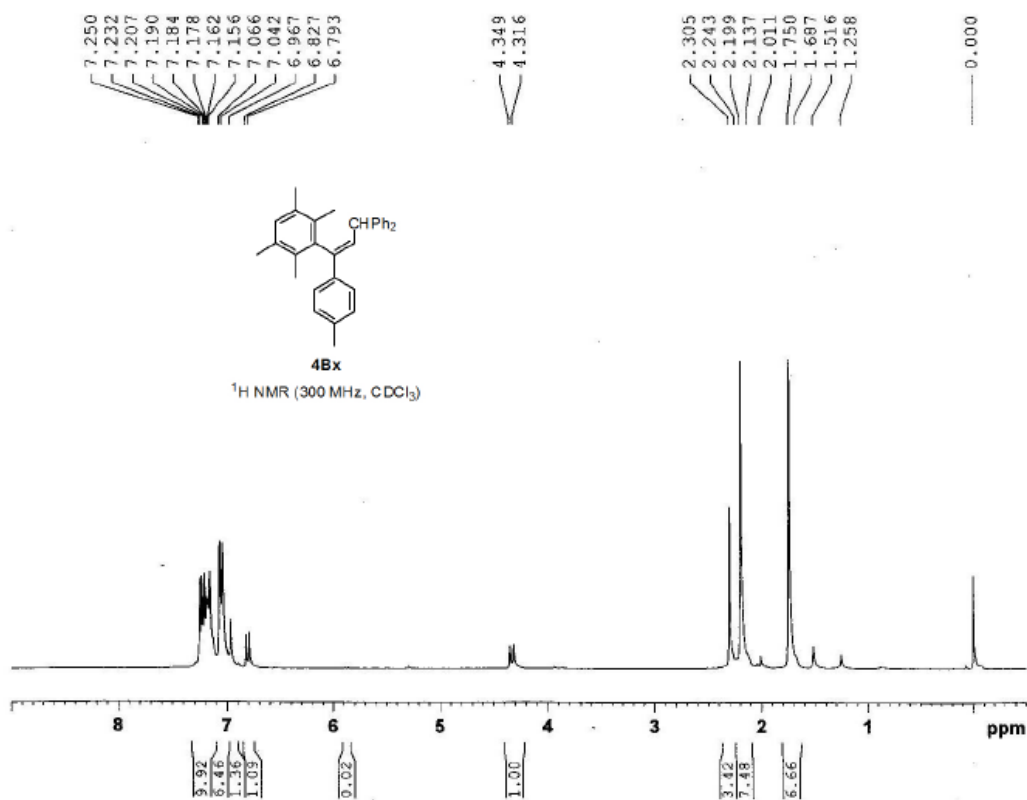

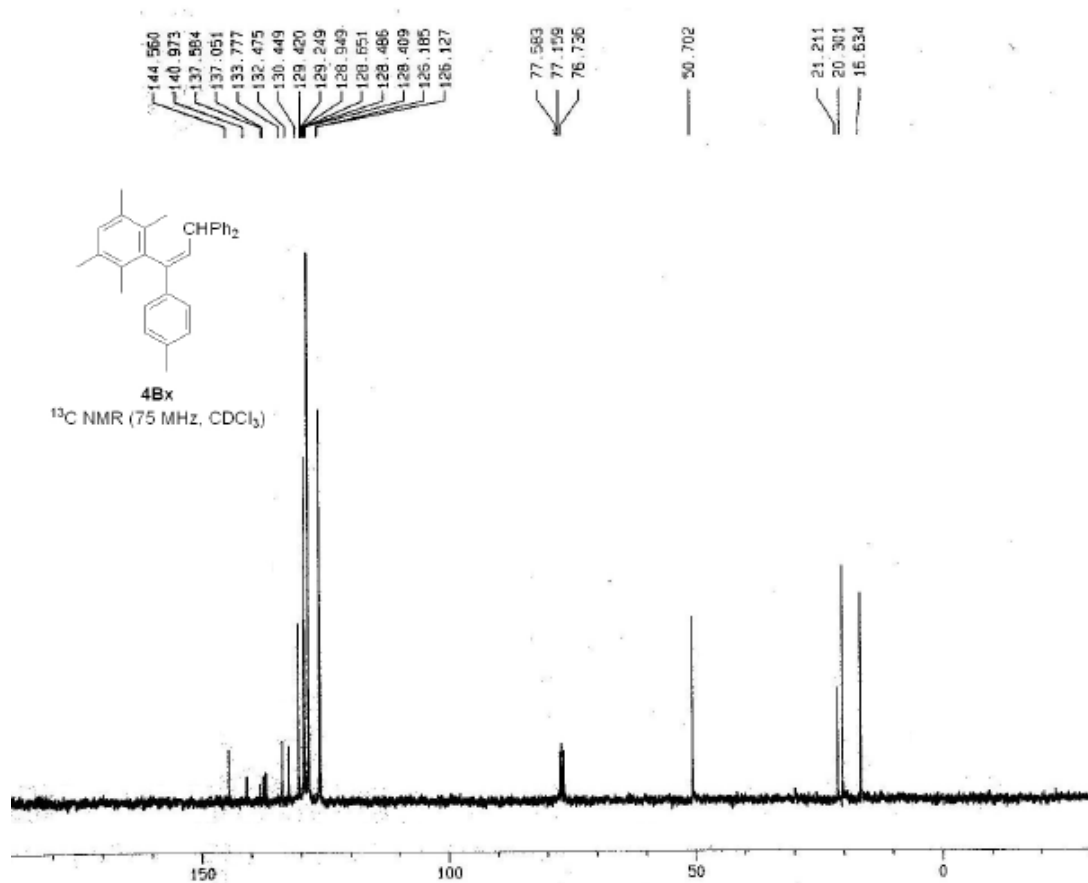

Supplement: b911954j.pdf [file b911954j.pdf]
